# Supplementary material for: Natural variation in C. elegans short tandem repeats
Source: HighWire-hosted journal article supplement (doi:10.1101/gr.277067.122), 2022-10-04
Supplement: Supplemental_Table_S3.xlsx [file Supplemental_Table_S3.xlsx]

## Sheet: pSTRs
Chr	start	ref_STR	geno	n_st	n_STR	allele_frequency	He
I	10890	STR_5	0	All	9691	0.998054	0.00388348
I	10890	STR_5	1	All	9691	0.00194553	0.00388348
I	34681	STR_10	0	All	9691	0.978175	0.0426981
I	34681	STR_10	1	All	9691	0.0218254	0.0426981
I	39863	STR_11	0	All	9691	0.791992	0.336359
I	39863	STR_11	3	All	9691	0.19043	0.336359
I	39863	STR_11	4	All	9691	0.0078125	0.336359
I	39863	STR_11	1	All	9691	0.0078125	0.336359
I	39863	STR_11	2	All	9691	0.00195312	0.336359
I	42127	STR_12	0	All	9691	0.756461	0.393383
I	42127	STR_12	4	All	9691	0.180915	0.393383
I	42127	STR_12	3	All	9691	0.0308151	0.393383
I	42127	STR_12	2	All	9691	0.0258449	0.393383
I	42127	STR_12	1	All	9691	0.00596421	0.393383
I	44770	STR_13	0	All	9691	0.216216	0.378712
I	44770	STR_13	2	All	9691	0.757722	0.378712
I	44770	STR_13	3	All	9691	0.0183398	0.378712
I	44770	STR_13	1	All	9691	0.00772201	0.378712
I	57133	STR_17	0	All	9691	0.873016	0.22749
I	57133	STR_17	3	All	9691	0.0992063	0.22749
I	57133	STR_17	2	All	9691	0.0218254	0.22749
I	57133	STR_17	1	All	9691	0.00595238	0.22749
I	57657	STR_18	0	All	9691	0.994318	0.0112991
I	57657	STR_18	1	All	9691	0.00568182	0.0112991
I	69031	STR_21	0	All	9691	0.995211	0.00953267
I	69031	STR_21	1	All	9691	0.00478927	0.00953267
I	69751	STR_23	0	All	9691	0.996262	0.00745567
I	69751	STR_23	1	All	9691	0.00186916	0.00745567
I	69751	STR_23	2	All	9691	0.00186916	0.00745567
I	79278	STR_25	0	All	9691	0.785433	0.345943
I	79278	STR_25	2	All	9691	0.191929	0.345943
I	79278	STR_25	1	All	9691	0.0167323	0.345943
I	79278	STR_25	3	All	9691	0.00590551	0.345943
I	82371	STR_27	0	All	9691	0.818089	0.316999
I	82371	STR_27	4	All	9691	0.00203252	0.316999
I	82371	STR_27	3	All	9691	0.0995935	0.316999
I	82371	STR_27	5	All	9691	0.00711382	0.316999
I	82371	STR_27	7	All	9691	0.0609756	0.316999
I	82371	STR_27	8	All	9691	0.00203252	0.316999
I	82371	STR_27	1	All	9691	0.00304878	0.316999
I	82371	STR_27	6	All	9691	0.00406504	0.316999
I	82371	STR_27	2	All	9691	0.00304878	0.316999
I	85908	STR_29	0	All	9691	0.489152	0.613587
I	85908	STR_29	4	All	9691	0.374753	0.613587
I	85908	STR_29	8	All	9691	0.0749507	0.613587
I	85908	STR_29	6	All	9691	0.0118343	0.613587
I	85908	STR_29	7	All	9691	0.0118343	0.613587
I	85908	STR_29	5	All	9691	0.00197239	0.613587
I	85908	STR_29	3	All	9691	0.0276134	0.613587
I	85908	STR_29	2	All	9691	0.00197239	0.613587
I	85908	STR_29	1	All	9691	0.00591716	0.613587
I	97214	STR_35	0	All	9691	0.992218	0.0154658
I	97214	STR_35	2	All	9691	0.00194553	0.0154658
I	97214	STR_35	1	All	9691	0.00583658	0.0154658
I	108460	STR_40	0	All	9691	0.994036	0.0118731
I	108460	STR_40	2	All	9691	0.00397614	0.0118731
I	108460	STR_40	1	All	9691	0.00198807	0.0118731
I	109243	STR_41	0	All	9691	0.387795	0.495885
I	109243	STR_41	2	All	9691	0.594488	0.495885
I	109243	STR_41	1	All	9691	0.0177165	0.495885
I	109450	STR_42	0	All	9691	0.142185	0.547599
I	109450	STR_42	5	All	9691	0.618644	0.547599
I	109450	STR_42	4	All	9691	0.222222	0.547599
I	109450	STR_42	2	All	9691	0.00376648	0.547599
I	109450	STR_42	1	All	9691	0.00188324	0.547599
I	109450	STR_42	3	All	9691	0.00564972	0.547599
I	109450	STR_42	6	All	9691	0.00564972	0.547599
I	122431	STR_46	0	All	9691	0.148148	0.259378
I	122431	STR_46	1	All	9691	0.847737	0.259378
I	122431	STR_46	2	All	9691	0.00411523	0.259378
I	128436	STR_49	0	All	9691	0.408397	0.496562
I	128436	STR_49	2	All	9691	0.580153	0.496562
I	128436	STR_49	1	All	9691	0.00381679	0.496562
I	128436	STR_49	3	All	9691	0.00763359	0.496562
I	133877	STR_51	0	All	9691	0.998081	0.0038314
I	133877	STR_51	1	All	9691	0.00191939	0.0038314
I	145145	STR_54	0	All	9691	0.984375	0.0308151
I	145145	STR_54	2	All	9691	0.0136719	0.0308151
I	145145	STR_54	1	All	9691	0.00195312	0.0308151
I	146126	STR_56	0	All	9691	0.995183	0.00959493
I	162858	STR_60	0	All	9691	0.949136	0.0967411
I	162858	STR_60	1	All	9691	0.0489443	0.0967411
I	162858	STR_60	2	All	9691	0.00191939	0.0967411
I	163697	STR_61	0	All	9691	0.985075	0.0294052
I	163697	STR_61	1	All	9691	0.0149254	0.0294052
I	165047	STR_62	0	All	9691	0.996169	0.00764082
I	165047	STR_62	2	All	9691	0.00191571	0.00764082
I	165047	STR_62	1	All	9691	0.00191571	0.00764082
I	184265	STR_65	0	All	9691	0.820717	0.294281
I	184265	STR_65	1	All	9691	0.179283	0.294281
I	188621	STR_69	0	All	9691	0.991329	0.0172055
I	188621	STR_69	2	All	9691	0.000963391	0.0172055
I	188621	STR_69	1	All	9691	0.00770713	0.0172055
I	188725	STR_70	0	All	9691	0.995893	0.00818615
I	204111	STR_74	0	All	9691	0.998077	0.00383876
I	204111	STR_74	1	All	9691	0.00192308	0.00383876
I	204244	STR_75	0	All	9691	0.33237	0.476082
I	204244	STR_75	2	All	9691	0.642582	0.476082
I	204244	STR_75	3	All	9691	0.0231214	0.476082
I	204244	STR_75	1	All	9691	0.000963391	0.476082
I	206617	STR_76	0	All	9691	0.15415	0.267431
I	206617	STR_76	2	All	9691	0.841897	0.267431
I	206617	STR_76	1	All	9691	0.00395257	0.267431
I	242068	STR_80	3	All	9691	0.529532	0.597218
I	242068	STR_80	0	All	9691	0.150713	0.597218
I	242068	STR_80	2	All	9691	0.315682	0.597218
I	242068	STR_80	1	All	9691	0.00203666	0.597218
I	242068	STR_80	4	All	9691	0.00203666	0.597218
I	256067	STR_82	0	All	9691	0.909962	0.166432
I	256067	STR_82	1	All	9691	0.0153257	0.166432
I	256067	STR_82	3	All	9691	0.00191571	0.166432
I	256067	STR_82	2	All	9691	0.0727969	0.166432
I	260318	STR_84	0	All	9691	0.992141	0.0156167
I	260318	STR_84	2	All	9691	0.00196464	0.0156167
I	260318	STR_84	1	All	9691	0.00589391	0.0156167
I	267948	STR_87	0	All	9691	0.831028	0.280841
I	267948	STR_87	1	All	9691	0.168972	0.280841
I	271001	STR_91	0	All	9691	0.9846	0.0304403
I	271001	STR_91	3	All	9691	0.0102669	0.0304403
I	275883	STR_96	0	All	9691	0.983962	0.0316145
I	275883	STR_96	2	All	9691	0.0141509	0.0316145
I	275883	STR_96	1	All	9691	0.00188679	0.0316145
I	277190	STR_97	0	All	9691	0.996139	0.00769219
I	277190	STR_97	1	All	9691	0.003861	0.00769219
I	291798	STR_104	0	All	9691	0.902132	0.178334
I	291798	STR_104	1	All	9691	0.00387597	0.178334
I	291798	STR_104	3	All	9691	0.0881783	0.178334
I	291798	STR_104	2	All	9691	0.00581395	0.178334
I	297019	STR_106	0	All	9691	0.998117	0.00375939
I	297019	STR_106	1	All	9691	0.00188324	0.00375939
I	305288	STR_107	0	All	9691	0.999033	0.00193237
I	310958	STR_108	0	All	9691	0.221281	0.344631
I	310958	STR_108	1	All	9691	0.778719	0.344631
I	311574	STR_110	0	All	9691	0.998095	0.00380227
I	311574	STR_110	1	All	9691	0.00190476	0.00380227
I	318380	STR_113	0	All	9691	0.995059	0.00984041
I	318380	STR_113	1	All	9691	0.00395257	0.00984041
I	318638	STR_114	0	All	9691	0.997164	0.00565857
I	318638	STR_114	1	All	9691	0.00189036	0.00565857
I	323520	STR_116	0	All	9691	0.998058	0.00387595
I	378104	STR_144	0	All	9691	0.77381	0.350057
I	378104	STR_144	1	All	9691	0.22619	0.350057
I	379911	STR_145	0	All	9691	0.8119	0.309504
I	379911	STR_145	2	All	9691	0.176583	0.309504
I	379911	STR_145	1	All	9691	0.0115163	0.309504
I	391368	STR_148	0	All	9691	0.799197	0.328053
I	391368	STR_148	3	All	9691	0.181727	0.328053
I	391368	STR_148	2	All	9691	0.0140562	0.328053
I	391368	STR_148	4	All	9691	0.00200803	0.328053
I	391368	STR_148	5	All	9691	0.00200803	0.328053
I	393311	STR_150	0	All	9691	0.97561	0.0478794
I	393311	STR_150	2	All	9691	0.0168856	0.0478794
I	393311	STR_150	4	All	9691	0.00375235	0.0478794
I	393311	STR_150	3	All	9691	0.00187617	0.0478794
I	393311	STR_150	1	All	9691	0.00187617	0.0478794
I	398033	STR_153	0	All	9691	0.306883	0.433298
I	398033	STR_153	1	All	9691	0.68738	0.433298
I	398033	STR_153	2	All	9691	0.00573614	0.433298
I	423707	STR_166	0	All	9691	0.914062	0.15727
I	423707	STR_166	1	All	9691	0.0849609	0.15727
I	428886	STR_169	0	All	9691	0.965844	0.0663164
I	428886	STR_169	3	All	9691	0.00189753	0.0663164
I	428886	STR_169	2	All	9691	0.028463	0.0663164
I	428886	STR_169	1	All	9691	0.00379507	0.0663164
I	429186	STR_170	0	All	9691	0.982922	0.0336299
I	429186	STR_170	2	All	9691	0.0151803	0.0336299
I	429186	STR_170	1	All	9691	0.00189753	0.0336299
I	433691	STR_172	0	All	9691	0.908644	0.16602
I	433691	STR_172	1	All	9691	0.0913556	0.16602
I	433734	STR_173	0	All	9691	0.157371	0.405646
I	433734	STR_173	3	All	9691	0.749004	0.405646
I	433734	STR_173	1	All	9691	0.0926295	0.405646
I	433734	STR_173	2	All	9691	0.000996016	0.405646
I	436327	STR_177	0	All	9691	0.800766	0.319079
I	436327	STR_177	1	All	9691	0.199234	0.319079
I	441495	STR_180	0	All	9691	0.996101	0.00776687
I	441495	STR_180	1	All	9691	0.00389864	0.00776687
I	448462	STR_184	0	All	9691	0.642308	0.522313
I	448462	STR_184	1	All	9691	0.202885	0.522313
I	448462	STR_184	2	All	9691	0.154808	0.522313
I	449416	STR_185	0	All	9691	0.809886	0.309358
I	449416	STR_185	1	All	9691	0.186312	0.309358
I	449416	STR_185	2	All	9691	0.00380228	0.309358
I	449583	STR_186	0	All	9691	0.996176	0.00762625
I	449583	STR_186	2	All	9691	0.00191205	0.00762625
I	449583	STR_186	1	All	9691	0.00191205	0.00762625
I	454886	STR_188	0	All	9691	0.992395	0.0150935
I	454886	STR_188	1	All	9691	0.00760456	0.0150935
I	461537	STR_194	0	All	9691	0.90566	0.170879
I	461537	STR_194	1	All	9691	0.0943396	0.170879
I	461608	STR_195	0	All	9691	0.991228	0.0174356
I	461608	STR_195	1	All	9691	0.00389864	0.0174356
I	461608	STR_195	3	All	9691	0.00389864	0.0174356
I	469325	STR_198	0	All	9691	0.498004	0.572091
I	469325	STR_198	1	All	9691	0.416168	0.572091
I	469325	STR_198	3	All	9691	0.0818363	0.572091
I	469325	STR_198	2	All	9691	0.00199601	0.572091
I	486087	STR_205	0	All	9691	0.816568	0.303701
I	486087	STR_205	2	All	9691	0.171598	0.303701
I	486087	STR_205	1	All	9691	0.00591716	0.303701
I	486087	STR_205	3	All	9691	0.00591716	0.303701
I	518514	STR_224	0	All	9691	0.775148	0.348587
I	518514	STR_224	1	All	9691	0.224852	0.348587
I	521541	STR_226	0	All	9691	0.927291	0.136619
I	521541	STR_226	4	All	9691	0.0587649	0.136619
I	521541	STR_226	1	All	9691	0.00199203	0.136619
I	521541	STR_226	5	All	9691	0.00398406	0.136619
I	521541	STR_226	3	All	9691	0.0059761	0.136619
I	521541	STR_226	2	All	9691	0.00199203	0.136619
I	521641	STR_227	0	All	9691	0.990872	0.0180889
I	521641	STR_227	1	All	9691	0.00912779	0.0180889
I	526599	STR_229	0	All	9691	0.910208	0.163459
I	526599	STR_229	1	All	9691	0.0897921	0.163459
I	528016	STR_230	0	All	9691	0.227533	0.379069
I	528016	STR_230	3	All	9691	0.754302	0.379069
I	528016	STR_230	2	All	9691	0.0124283	0.379069
I	528016	STR_230	1	All	9691	0.00573614	0.379069
I	530727	STR_233	0	All	9691	0.992467	0.0149524
I	530727	STR_233	1	All	9691	0.00753296	0.0149524
I	541802	STR_238	0	All	9691	0.913168	0.159513
I	541802	STR_238	2	All	9691	0.00572519	0.159513
I	541802	STR_238	1	All	9691	0.0811069	0.159513
I	542345	STR_239	0	All	9691	0.998127	0.0037383
I	542345	STR_239	1	All	9691	0.00187266	0.0037383
I	543553	STR_240	0	All	9691	0.90159	0.179051
I	543553	STR_240	1	All	9691	0.0894632	0.179051
I	543553	STR_240	2	All	9691	0.00894632	0.179051
I	548130	STR_245	0	All	9691	0.998117	0.00376116
I	548891	STR_246	0	All	9691	0.989362	0.0211213
I	548891	STR_246	2	All	9691	0.00193424	0.0211213
I	548891	STR_246	4	All	9691	0.00193424	0.0211213
I	548891	STR_246	1	All	9691	0.00580271	0.0211213
I	551351	STR_247	0	All	9691	0.816306	0.317432
I	551351	STR_247	1	All	9691	0.0854617	0.317432
I	551351	STR_247	3	All	9691	0.0943026	0.317432
I	551351	STR_247	2	All	9691	0.00392927	0.317432
I	559487	STR_251	3	All	9691	0.924125	0.14107
I	559487	STR_251	2	All	9691	0.0700389	0.14107
I	559487	STR_251	1	All	9691	0.00389105	0.14107
I	559487	STR_251	0	All	9691	0.00194553	0.14107
I	569770	STR_255	0	All	9691	0.98998	0.0199116
I	569770	STR_255	2	All	9691	0.00400802	0.0199116
I	569770	STR_255	3	All	9691	0.00200401	0.0199116
I	569770	STR_255	1	All	9691	0.00200401	0.0199116
I	570229	STR_256	0	All	9691	0.976789	0.0454265
I	570229	STR_256	1	All	9691	0.0212766	0.0454265
I	570229	STR_256	2	All	9691	0.00193424	0.0454265
I	573949	STR_261	0	All	9691	0.804924	0.314774
I	573949	STR_261	1	All	9691	0.193182	0.314774
I	573949	STR_261	2	All	9691	0.00189394	0.314774
I	575237	STR_263	0	All	9691	0.774257	0.356804
I	575237	STR_263	3	All	9691	0.208911	0.356804
I	575237	STR_263	6	All	9691	0.00693069	0.356804
I	575237	STR_263	4	All	9691	0.0029703	0.356804
I	575237	STR_263	2	All	9691	0.0039604	0.356804
I	575237	STR_263	5	All	9691	0.0019802	0.356804
I	575308	STR_264	0	All	9691	0.363985	0.465429
I	575308	STR_264	1	All	9691	0.6341	0.465429
I	575308	STR_264	2	All	9691	0.00191571	0.465429
I	577002	STR_265	0	All	9691	0.34593	0.483311
I	577002	STR_265	3	All	9691	0.629845	0.483311
I	577002	STR_265	2	All	9691	0.00872093	0.483311
I	577002	STR_265	1	All	9691	0.0155039	0.483311
I	587829	STR_269	0	All	9691	0.984586	0.0303812
I	587829	STR_269	2	All	9691	0.0144509	0.0303812
I	588356	STR_270	0	All	9691	0.997126	0.00573428
I	588356	STR_270	2	All	9691	0.00191571	0.00573428
I	588776	STR_271	0	All	9691	0.387984	0.647942
I	588776	STR_271	2	All	9691	0.421589	0.647942
I	588776	STR_271	3	All	9691	0.151731	0.647942
I	588776	STR_271	1	All	9691	0.0162933	0.647942
I	588776	STR_271	4	All	9691	0.0224033	0.647942
I	608954	STR_278	0	All	9691	0.988462	0.0228476
I	608954	STR_278	2	All	9691	0.00961538	0.0228476
I	608954	STR_278	1	All	9691	0.00192308	0.0228476
I	613217	STR_283	0	All	9691	0.991903	0.0160939
I	613217	STR_283	2	All	9691	0.00506073	0.0160939
I	613217	STR_283	1	All	9691	0.00303644	0.0160939
I	629401	STR_289	0	All	9691	0.724242	0.408536
I	629401	STR_289	5	All	9691	0.258586	0.408536
I	629401	STR_289	2	All	9691	0.0020202	0.408536
I	629401	STR_289	4	All	9691	0.0040404	0.408536
I	629401	STR_289	3	All	9691	0.00606061	0.408536
I	654615	STR_296	0	All	9691	0.998124	0.00374531
I	654615	STR_296	1	All	9691	0.00187617	0.00374531
I	681783	STR_315	0	All	9691	0.175595	0.632986
I	681783	STR_315	2	All	9691	0.53373	0.632986
I	681783	STR_315	4	All	9691	0.0734127	0.632986
I	681783	STR_315	3	All	9691	0.214286	0.632986
I	681783	STR_315	5	All	9691	0.00198413	0.632986
I	681783	STR_315	1	All	9691	0.000992063	0.632986
I	685351	STR_320	0	All	9691	0.501008	0.626427
I	685351	STR_320	2	All	9691	0.202621	0.626427
I	685351	STR_320	1	All	9691	0.285282	0.626427
I	685351	STR_320	3	All	9691	0.0110887	0.626427
I	734237	STR_356	0	All	9691	0.991071	0.0177371
I	734237	STR_356	2	All	9691	0.00595238	0.0177371
I	754804	STR_369	0	All	9691	0.97332	0.0520337
I	754804	STR_369	1	All	9691	0.0247036	0.0520337
I	757170	STR_371	0	All	9691	0.979371	0.0406417
I	757170	STR_371	1	All	9691	0.0117878	0.0406417
I	757170	STR_371	3	All	9691	0.00687623	0.0406417
I	757170	STR_371	2	All	9691	0.00196464	0.0406417
I	757298	STR_372	0	All	9691	0.774951	0.348804
I	757298	STR_372	1	All	9691	0.225049	0.348804
I	762708	STR_376	0	All	9691	0.977444	0.0443708
I	762708	STR_376	2	All	9691	0.0075188	0.0443708
I	762708	STR_376	3	All	9691	0.0131579	0.0443708
I	762708	STR_376	1	All	9691	0.0018797	0.0443708
I	784041	STR_385	0	All	9691	0.907298	0.168752
I	784041	STR_385	3	All	9691	0.0897436	0.168752
I	784041	STR_385	1	All	9691	0.00197239	0.168752
I	788185	STR_392	0	All	9691	0.161	0.412586
I	788185	STR_392	2	All	9691	0.744	0.412586
I	788185	STR_392	1	All	9691	0.089	0.412586
I	788185	STR_392	3	All	9691	0.006	0.412586
I	788994	STR_393	0	All	9691	0.712963	0.417731
I	788994	STR_393	1	All	9691	0.271605	0.417731
I	788994	STR_393	3	All	9691	0.0133745	0.417731
I	788994	STR_393	2	All	9691	0.00205761	0.417731
I	793081	STR_401	0	All	9691	0.748024	0.377957
I	793081	STR_401	2	All	9691	0.25	0.377957
I	794289	STR_402	0	All	9691	0.995229	0.00950374
I	794289	STR_402	2	All	9691	0.00381679	0.00950374
I	794529	STR_403	0	All	9691	0.996226	0.00752403
I	794529	STR_403	2	All	9691	0.00283019	0.00752403
I	797247	STR_407	0	All	9691	0.105469	0.450346
I	797247	STR_407	3	All	9691	0.713867	0.450346
I	797247	STR_407	1	All	9691	0.169922	0.450346
I	797247	STR_407	2	All	9691	0.00390625	0.450346
I	797247	STR_407	5	All	9691	0.00585938	0.450346
I	809163	STR_420	0	All	9691	0.747515	0.382818
I	809163	STR_420	1	All	9691	0.241551	0.382818
I	809163	STR_420	3	All	9691	0.00695825	0.382818
I	809163	STR_420	4	All	9691	0.00198807	0.382818
I	812271	STR_423	0	All	9691	0.998106	0.0037807
I	812271	STR_423	1	All	9691	0.00189394	0.0037807
I	814035	STR_425	0	All	9691	0.992157	0.0156094
I	814035	STR_425	2	All	9691	0.00196078	0.0156094
I	814035	STR_425	1	All	9691	0.00196078	0.0156094
I	814035	STR_425	4	All	9691	0.00196078	0.0156094
I	814035	STR_425	3	All	9691	0.00196078	0.0156094
I	814176	STR_426	0	All	9691	0.243381	0.652604
I	814176	STR_426	1	All	9691	0.179226	0.652604
I	814176	STR_426	4	All	9691	0.504073	0.652604
I	814176	STR_426	2	All	9691	0.0142566	0.652604
I	814176	STR_426	5	All	9691	0.0285132	0.652604
I	814176	STR_426	3	All	9691	0.0305499	0.652604
I	814232	STR_427	0	All	9691	0.827869	0.292353
I	814232	STR_427	2	All	9691	0.022541	0.292353
I	814232	STR_427	3	All	9691	0.147541	0.292353
I	814232	STR_427	1	All	9691	0.00204918	0.292353
I	815693	STR_429	0	All	9691	0.949416	0.0962392
I	815693	STR_429	2	All	9691	0.0486381	0.0962392
I	815693	STR_429	1	All	9691	0.00194553	0.0962392
I	815944	STR_430	0	All	9691	0.143275	0.248827
I	815944	STR_430	1	All	9691	0.854776	0.248827
I	815944	STR_430	2	All	9691	0.00194932	0.248827
I	819739	STR_436	0	All	9691	0.763366	0.366711
I	819739	STR_436	5	All	9691	0.224752	0.366711
I	819739	STR_436	4	All	9691	0.0019802	0.366711
I	819739	STR_436	3	All	9691	0.00594059	0.366711
I	819739	STR_436	2	All	9691	0.0019802	0.366711
I	819739	STR_436	1	All	9691	0.0019802	0.366711
I	819892	STR_437	0	All	9691	0.90099	0.179175
I	819892	STR_437	1	All	9691	0.0950495	0.179175
I	819892	STR_437	2	All	9691	0.0019802	0.179175
I	819892	STR_437	3	All	9691	0.0019802	0.179175
I	820167	STR_439	0	All	9691	0.995155	0.00965424
I	820167	STR_439	2	All	9691	0.00193798	0.00965424
I	820167	STR_439	1	All	9691	0.00290698	0.00965424
I	826283	STR_443	0	All	9691	0.971537	0.0556946
I	826283	STR_443	1	All	9691	0.0170778	0.0556946
I	826283	STR_443	2	All	9691	0.0113852	0.0556946
I	826328	STR_444	0	All	9691	0.91966	0.147771
I	826328	STR_444	1	All	9691	0.0803403	0.147771
I	826435	STR_445	0	All	9691	0.942801	0.109847
I	826435	STR_445	5	All	9691	0.00788955	0.109847
I	826435	STR_445	4	All	9691	0.0167653	0.109847
I	826435	STR_445	2	All	9691	0.030572	0.109847
I	828616	STR_447	0	All	9691	0.843058	0.277348
I	828616	STR_447	2	All	9691	0.0995976	0.277348
I	828616	STR_447	3	All	9691	0.0140845	0.277348
I	828616	STR_447	4	All	9691	0.0422535	0.277348
I	828873	STR_448	0	All	9691	0.822515	0.30822
I	828873	STR_448	1	All	9691	0.00709939	0.30822
I	828873	STR_448	4	All	9691	0.119675	0.30822
I	828873	STR_448	5	All	9691	0.0223124	0.30822
I	828873	STR_448	7	All	9691	0.0182556	0.30822
I	828873	STR_448	6	All	9691	0.0020284	0.30822
I	828873	STR_448	3	All	9691	0.00608519	0.30822
I	834509	STR_457	0	All	9691	0.174847	0.454211
I	834509	STR_457	3	All	9691	0.708589	0.454211
I	834509	STR_457	2	All	9691	0.114519	0.454211
I	834509	STR_457	1	All	9691	0.00204499	0.454211
I	834638	STR_458	0	All	9691	0.999031	0.00193611
I	838788	STR_463	0	All	9691	0.998127	0.0037383
I	838788	STR_463	1	All	9691	0.00187266	0.0037383
I	840742	STR_465	0	All	9691	0.954631	0.0871441
I	840742	STR_465	1	All	9691	0.00567108	0.0871441
I	840742	STR_465	2	All	9691	0.0387524	0.0871441
I	853740	STR_477	0	All	9691	0.999037	0.00192493
I	864638	STR_483	0	All	9691	0.993409	0.0131135
I	864638	STR_483	1	All	9691	0.0047081	0.0131135
I	864638	STR_483	2	All	9691	0.00188324	0.0131135
I	880072	STR_489	0	All	9691	0.990157	0.0195475
I	880072	STR_489	3	All	9691	0.00492126	0.0195475
I	880072	STR_489	2	All	9691	0.00393701	0.0195475
I	881322	STR_490	0	All	9691	0.987759	0.0242214
I	881322	STR_490	1	All	9691	0.0103578	0.0242214
I	881322	STR_490	2	All	9691	0.00188324	0.0242214
I	881416	STR_491	0	All	9691	0.997154	0.00568
I	881416	STR_491	2	All	9691	0.00189753	0.00568
I	881826	STR_494	0	All	9691	0.998077	0.00383876
I	881826	STR_494	1	All	9691	0.00192308	0.00383876
I	882978	STR_498	0	All	9691	0.994393	0.0111521
I	882978	STR_498	1	All	9691	0.00560748	0.0111521
I	884566	STR_499	0	All	9691	0.940341	0.112311
I	884566	STR_499	1	All	9691	0.0587121	0.112311
I	940328	STR_534	0	All	9691	0.669625	0.442455
I	940328	STR_534	1	All	9691	0.330375	0.442455
I	974788	STR_566	0	All	9691	0.807102	0.320683
I	974788	STR_566	2	All	9691	0.166027	0.320683
I	974788	STR_566	4	All	9691	0.0172745	0.320683
I	974788	STR_566	3	All	9691	0.00575816	0.320683
I	974788	STR_566	1	All	9691	0.00191939	0.320683
I	974788	STR_566	5	All	9691	0.00191939	0.320683
I	978328	STR_570	0	All	9691	0.968085	0.061961
I	978328	STR_570	2	All	9691	0.0290135	0.061961
I	978328	STR_570	1	All	9691	0.00290135	0.061961
I	992953	STR_578	0	All	9691	0.799801	0.33454
I	992953	STR_578	1	All	9691	0.156375	0.33454
I	992953	STR_578	2	All	9691	0.0059761	0.33454
I	992953	STR_578	3	All	9691	0.0358566	0.33454
I	992953	STR_578	4	All	9691	0.00199203	0.33454
I	995090	STR_579	0	All	9691	0.886756	0.208016
I	995090	STR_579	1	All	9691	0.0556622	0.208016
I	995090	STR_579	3	All	9691	0.049904	0.208016
I	995090	STR_579	2	All	9691	0.00767754	0.208016
I	995820	STR_580	0	All	9691	0.961754	0.073567
I	995820	STR_580	1	All	9691	0.0382463	0.073567
I	999081	STR_581	0	All	9691	0.780769	0.349554
I	999081	STR_581	3	All	9691	0.201923	0.349554
I	999081	STR_581	2	All	9691	0.00673077	0.349554
I	999081	STR_581	6	All	9691	0.00192308	0.349554
I	999081	STR_581	1	All	9691	0.00384615	0.349554
I	999081	STR_581	5	All	9691	0.00192308	0.349554
I	999081	STR_581	4	All	9691	0.00192308	0.349554
I	999163	STR_582	4	All	9691	0.245902	0.631968
I	999163	STR_582	0	All	9691	0.239754	0.631968
I	999163	STR_582	3	All	9691	0.5	0.631968
I	999163	STR_582	5	All	9691	0.00204918	0.631968
I	999163	STR_582	1	All	9691	0.00102459	0.631968
I	999163	STR_582	6	All	9691	0.00307377	0.631968
I	999163	STR_582	2	All	9691	0.00819672	0.631968
I	999387	STR_583	0	All	9691	0.797852	0.324495
I	999387	STR_583	2	All	9691	0.197266	0.324495
I	999387	STR_583	1	All	9691	0.00488281	0.324495
I	1006145	STR_588	0	All	9691	0.820463	0.294607
I	1006145	STR_588	1	All	9691	0.179537	0.294607
I	1060432	STR_620	0	All	9691	0.995164	0.00963938
I	1060432	STR_620	1	All	9691	0.00193424	0.00963938
I	1060432	STR_620	2	All	9691	0.00193424	0.00963938
I	1062351	STR_624	0	All	9691	0.5	0.643087
I	1062351	STR_624	1	All	9691	0.240286	0.643087
I	1062351	STR_624	2	All	9691	0.220859	0.643087
I	1062351	STR_624	6	All	9691	0.0143149	0.643087
I	1062351	STR_624	4	All	9691	0.00408998	0.643087
I	1062351	STR_624	5	All	9691	0.0102249	0.643087
I	1062351	STR_624	3	All	9691	0.00204499	0.643087
I	1062351	STR_624	7	All	9691	0.00817996	0.643087
I	1068761	STR_629	0	All	9691	0.964419	0.069071
I	1068761	STR_629	3	All	9691	0.0280899	0.069071
I	1068761	STR_629	1	All	9691	0.00187266	0.069071
I	1068761	STR_629	2	All	9691	0.00561798	0.069071
I	1069377	STR_630	0	All	9691	0.747093	0.383501
I	1069377	STR_630	2	All	9691	0.241279	0.383501
I	1069377	STR_630	1	All	9691	0.0116279	0.383501
I	1069604	STR_631	0	All	9691	0.972015	0.0544038
I	1069604	STR_631	1	All	9691	0.0279851	0.0544038
I	1069715	STR_632	0	All	9691	0.550916	0.595628
I	1069715	STR_632	4	All	9691	0.306517	0.595628
I	1069715	STR_632	6	All	9691	0.0213849	0.595628
I	1069715	STR_632	1	All	9691	0.00610998	0.595628
I	1069715	STR_632	2	All	9691	0.00305499	0.595628
I	1069715	STR_632	5	All	9691	0.0478615	0.595628
I	1069715	STR_632	3	All	9691	0.0641548	0.595628
I	1069884	STR_633	0	All	9691	0.789784	0.342123
I	1069884	STR_633	1	All	9691	0.0176817	0.342123
I	1069884	STR_633	4	All	9691	0.183694	0.342123
I	1069884	STR_633	2	All	9691	0.00785855	0.342123
I	1074358	STR_637	0	All	9691	0.808008	0.318547
I	1074358	STR_637	3	All	9691	0.168378	0.318547
I	1074358	STR_637	1	All	9691	0.00102669	0.318547
I	1074358	STR_637	5	All	9691	0.0123203	0.318547
I	1074358	STR_637	2	All	9691	0.00205339	0.318547
I	1074358	STR_637	4	All	9691	0.00821355	0.318547
I	1090216	STR_647	0	All	9691	0.108135	0.493077
I	1090216	STR_647	3	All	9691	0.695437	0.493077
I	1090216	STR_647	2	All	9691	0.00793651	0.493077
I	1090216	STR_647	11	All	9691	0.0228175	0.493077
I	1090216	STR_647	8	All	9691	0.014881	0.493077
I	1090216	STR_647	7	All	9691	0.0238095	0.493077
I	1090216	STR_647	10	All	9691	0.00992063	0.493077
I	1090216	STR_647	12	All	9691	0.000992063	0.493077
I	1090216	STR_647	9	All	9691	0.00793651	0.493077
I	1090216	STR_647	6	All	9691	0.00198413	0.493077
I	1090216	STR_647	4	All	9691	0.100198	0.493077
I	1090216	STR_647	1	All	9691	0.00396825	0.493077
I	1090216	STR_647	5	All	9691	0.00198413	0.493077
I	1100652	STR_652	0	All	9691	0.708015	0.413459
I	1100652	STR_652	1	All	9691	0.291985	0.413459
I	1103690	STR_655	0	All	9691	0.858121	0.253923
I	1103690	STR_655	1	All	9691	0.0949119	0.253923
I	1103690	STR_655	3	All	9691	0.0156556	0.253923
I	1103690	STR_655	5	All	9691	0.0176125	0.253923
I	1103690	STR_655	2	All	9691	0.00195695	0.253923
I	1103690	STR_655	4	All	9691	0.0117417	0.253923
I	1154244	STR_670	0	All	9691	0.819473	0.299032
I	1154244	STR_670	3	All	9691	0.1714	0.299032
I	1154244	STR_670	2	All	9691	0.0020284	0.299032
I	1154244	STR_670	1	All	9691	0.00709939	0.299032
I	1154504	STR_671	0	All	9691	0.988048	0.0237159
I	1154504	STR_671	2	All	9691	0.00398406	0.0237159
I	1154504	STR_671	4	All	9691	0.00498008	0.0237159
I	1154504	STR_671	1	All	9691	0.00199203	0.0237159
I	1154504	STR_671	3	All	9691	0.000996016	0.0237159
I	1189241	STR_693	0	All	9691	0.983654	0.032328
I	1189241	STR_693	1	All	9691	0.00576923	0.032328
I	1189241	STR_693	3	All	9691	0.00769231	0.032328
I	1189241	STR_693	4	All	9691	0.000961538	0.032328
I	1189241	STR_693	2	All	9691	0.00192308	0.032328
I	1219408	STR_706	0	All	9691	0.523904	0.520476
I	1219408	STR_706	2	All	9691	0.452191	0.520476
I	1219408	STR_706	1	All	9691	0.0239044	0.520476
I	1224003	STR_710	0	All	9691	0.974813	0.0491497
I	1224003	STR_710	2	All	9691	0.0242537	0.0491497
I	1224003	STR_710	1	All	9691	0.000932836	0.0491497
I	1229439	STR_713	0	All	9691	0.996226	0.00752581
I	1229439	STR_713	2	All	9691	0.00188679	0.00752581
I	1229439	STR_713	1	All	9691	0.00188679	0.00752581
I	1230911	STR_714	0	All	9691	0.293542	0.420257
I	1230911	STR_714	2	All	9691	0.702544	0.420257
I	1230911	STR_714	3	All	9691	0.00195695	0.420257
I	1230911	STR_714	1	All	9691	0.00195695	0.420257
I	1232872	STR_717	0	All	9691	0.978439	0.0424866
I	1232872	STR_717	3	All	9691	0.00205339	0.0424866
I	1232872	STR_717	5	All	9691	0.00205339	0.0424866
I	1232872	STR_717	6	All	9691	0.0123203	0.0424866
I	1232872	STR_717	2	All	9691	0.00205339	0.0424866
I	1232872	STR_717	1	All	9691	0.00205339	0.0424866
I	1235916	STR_720	0	All	9691	0.770633	0.353515
I	1235916	STR_720	1	All	9691	0.229367	0.353515
I	1256058	STR_737	0	All	9691	0.988119	0.0235742
I	1256058	STR_737	2	All	9691	0.0019802	0.0235742
I	1256058	STR_737	3	All	9691	0.00594059	0.0235742
I	1256058	STR_737	1	All	9691	0.0019802	0.0235742
I	1256058	STR_737	4	All	9691	0.0019802	0.0235742
I	1257056	STR_738	0	All	9691	0.999055	0.00188857
I	1257056	STR_738	1	All	9691	0.00094518	0.00188857
I	1261622	STR_739	0	All	9691	0.98289	0.0337651
I	1261622	STR_739	1	All	9691	0.0114068	0.0337651
I	1261622	STR_739	2	All	9691	0.00570342	0.0337651
I	1284881	STR_749	0	All	9691	0.808233	0.337585
I	1284881	STR_749	5	All	9691	0.0702811	0.337585
I	1284881	STR_749	7	All	9691	0.0271084	0.337585
I	1284881	STR_749	2	All	9691	0.0261044	0.337585
I	1284881	STR_749	8	All	9691	0.00200803	0.337585
I	1284881	STR_749	6	All	9691	0.0522088	0.337585
I	1284881	STR_749	9	All	9691	0.00903614	0.337585
I	1284881	STR_749	10	All	9691	0.00200803	0.337585
I	1284881	STR_749	4	All	9691	0.00100402	0.337585
I	1288899	STR_750	0	All	9691	0.982792	0.0339269
I	1288899	STR_750	1	All	9691	0.00382409	0.0339269
I	1288899	STR_750	2	All	9691	0.0133843	0.0339269
I	1295666	STR_754	0	All	9691	0.925926	0.139954
I	1295666	STR_754	1	All	9691	0.0497076	0.139954
I	1295666	STR_754	2	All	9691	0.00779727	0.139954
I	1295666	STR_754	3	All	9691	0.0126706	0.139954
I	1295666	STR_754	4	All	9691	0.00389864	0.139954
I	1300101	STR_759	0	All	9691	0.538845	0.504204
I	1300101	STR_759	1	All	9691	0.453187	0.504204
I	1300101	STR_759	2	All	9691	0.00796813	0.504204
I	1300188	STR_760	0	All	9691	0.845261	0.26159
I	1300188	STR_760	1	All	9691	0.154739	0.26159
I	1301412	STR_761	0	All	9691	0.653922	0.521382
I	1301412	STR_761	2	All	9691	0.158824	0.521382
I	1301412	STR_761	3	All	9691	0.0294118	0.521382
I	1301412	STR_761	1	All	9691	0.157843	0.521382
I	1301526	STR_762	0	All	9691	0.900574	0.183959
I	1301526	STR_762	2	All	9691	0.0439771	0.183959
I	1301526	STR_762	1	All	9691	0.0554493	0.183959
I	1301613	STR_763	0	All	9691	0.982692	0.0340163
I	1301613	STR_763	1	All	9691	0.0173077	0.0340163
I	1316797	STR_774	0	All	9691	0.872299	0.22674
I	1316797	STR_774	1	All	9691	0.11002	0.22674
I	1316797	STR_774	2	All	9691	0.0157171	0.22674
I	1316797	STR_774	3	All	9691	0.00196464	0.22674
I	1446595	STR_851	0	All	9691	0.961315	0.0746533
I	1446595	STR_851	3	All	9691	0.0348162	0.0746533
I	1446595	STR_851	2	All	9691	0.00193424	0.0746533
I	1446595	STR_851	1	All	9691	0.00193424	0.0746533
I	1455520	STR_854	0	All	9691	0.49311	0.550015
I	1455520	STR_854	2	All	9691	0.451772	0.550015
I	1455520	STR_854	1	All	9691	0.0521654	0.550015
I	1455520	STR_854	3	All	9691	0.00295276	0.550015
I	1456644	STR_856	0	All	9691	0.941406	0.112417
I	1456644	STR_856	3	All	9691	0.0332031	0.112417
I	1456644	STR_856	8	All	9691	0.00195312	0.112417
I	1456644	STR_856	5	All	9691	0.00195312	0.112417
I	1456644	STR_856	2	All	9691	0.0146484	0.112417
I	1456644	STR_856	1	All	9691	0.00195312	0.112417
I	1456644	STR_856	4	All	9691	0.00195312	0.112417
I	1456644	STR_856	7	All	9691	0.00195312	0.112417
I	1471301	STR_860	0	All	9691	0.989173	0.0215044
I	1471301	STR_860	2	All	9691	0.0019685	0.0215044
I	1471301	STR_860	3	All	9691	0.0019685	0.0215044
I	1471301	STR_860	1	All	9691	0.00393701	0.0215044
I	1471301	STR_860	4	All	9691	0.00295276	0.0215044
I	1471614	STR_862	0	All	9691	0.970884	0.056739
I	1471614	STR_862	2	All	9691	0.0251004	0.056739
I	1471614	STR_862	1	All	9691	0.00401606	0.056739
I	1481791	STR_873	0	All	9691	0.988417	0.022935
I	1481791	STR_873	1	All	9691	0.0019305	0.022935
I	1481791	STR_873	2	All	9691	0.00965251	0.022935
I	1499611	STR_883	0	All	9691	0.993915	0.012119
I	1499611	STR_883	1	All	9691	0.0020284	0.012119
I	1499611	STR_883	3	All	9691	0.0030426	0.012119
I	1504361	STR_884	2	All	9691	0.638402	0.523559
I	1504361	STR_884	1	All	9691	0.0292398	0.523559
I	1504361	STR_884	0	All	9691	0.255361	0.523559
I	1504361	STR_884	5	All	9691	0.037037	0.523559
I	1504361	STR_884	3	All	9691	0.0380117	0.523559
I	1504361	STR_884	4	All	9691	0.00194932	0.523559
I	1511471	STR_894	0	All	9691	0.947519	0.101722
I	1511471	STR_894	3	All	9691	0.00572519	0.101722
I	1511471	STR_894	1	All	9691	0.00763359	0.101722
I	1511471	STR_894	2	All	9691	0.00954198	0.101722
I	1511471	STR_894	7	All	9691	0.0133588	0.101722
I	1511471	STR_894	4	All	9691	0.00572519	0.101722
I	1511471	STR_894	6	All	9691	0.00954198	0.101722
I	1512022	STR_895	0	All	9691	0.928295	0.133783
I	1512022	STR_895	1	All	9691	0.00387597	0.133783
I	1512022	STR_895	2	All	9691	0.0668605	0.133783
I	1532201	STR_906	0	All	9691	0.241551	0.3754
I	1532201	STR_906	1	All	9691	0.752485	0.3754
I	1532201	STR_906	2	All	9691	0.00397614	0.3754
I	1532201	STR_906	3	All	9691	0.00198807	0.3754
I	1542406	STR_915	0	All	9691	0.560757	0.521541
I	1542406	STR_915	4	All	9691	0.404382	0.521541
I	1542406	STR_915	5	All	9691	0.0149402	0.521541
I	1542406	STR_915	1	All	9691	0.00199203	0.521541
I	1542406	STR_915	2	All	9691	0.00199203	0.521541
I	1542406	STR_915	3	All	9691	0.0159363	0.521541
I	1547177	STR_919	0	All	9691	0.994186	0.0115772
I	1547177	STR_919	3	All	9691	0.00387597	0.0115772
I	1548363	STR_922	0	All	9691	0.919715	0.151353
I	1548363	STR_922	1	All	9691	0.0050813	0.151353
I	1548363	STR_922	5	All	9691	0.00203252	0.151353
I	1548363	STR_922	3	All	9691	0.0457317	0.151353
I	1548363	STR_922	4	All	9691	0.0254065	0.151353
I	1548363	STR_922	2	All	9691	0.00203252	0.151353
I	1559275	STR_929	0	All	9691	0.994275	0.0113994
I	1559275	STR_929	2	All	9691	0.00381679	0.0113994
I	1559275	STR_929	1	All	9691	0.0019084	0.0113994
I	1562725	STR_933	0	All	9691	0.988372	0.0230887
I	1562725	STR_933	1	All	9691	0.00387597	0.0230887
I	1562725	STR_933	2	All	9691	0.00193798	0.0230887
I	1562725	STR_933	3	All	9691	0.00193798	0.0230887
I	1562725	STR_933	5	All	9691	0.00290698	0.0230887
I	1570456	STR_939	0	All	9691	0.809434	0.311969
I	1570456	STR_939	2	All	9691	0.181132	0.311969
I	1570456	STR_939	4	All	9691	0.00188679	0.311969
I	1570456	STR_939	3	All	9691	0.00188679	0.311969
I	1570456	STR_939	1	All	9691	0.00566038	0.311969
I	1623751	STR_976	0	All	9691	0.942857	0.108161
I	1623751	STR_976	2	All	9691	0.00380952	0.108161
I	1623751	STR_976	1	All	9691	0.0533333	0.108161
I	1634213	STR_984	0	All	9691	0.371926	0.549663
I	1634213	STR_984	3	All	9691	0.556352	0.549663
I	1634213	STR_984	5	All	9691	0.0112705	0.549663
I	1634213	STR_984	1	All	9691	0.0471311	0.549663
I	1634213	STR_984	4	All	9691	0.00204918	0.549663
I	1634213	STR_984	2	All	9691	0.0112705	0.549663
I	1634577	STR_985	0	All	9691	0.950605	0.0952194
I	1634577	STR_985	1	All	9691	0.0181452	0.0952194
I	1634577	STR_985	4	All	9691	0.0282258	0.0952194
I	1634577	STR_985	3	All	9691	0.00201613	0.0952194
I	1634622	STR_986	0	All	9691	0.412698	0.48592
I	1634622	STR_986	2	All	9691	0.58631	0.48592
I	1634622	STR_986	1	All	9691	0.000992063	0.48592
I	1651412	STR_992	0	All	9691	0.550584	0.550351
I	1651412	STR_992	1	All	9691	0.376459	0.550351
I	1651412	STR_992	3	All	9691	0.0690661	0.550351
I	1651412	STR_992	2	All	9691	0.00389105	0.550351
I	1670124	STR_995	0	All	9691	0.998138	0.00371746
I	1672507	STR_997	0	All	9691	0.97318	0.0527003
I	1672507	STR_997	3	All	9691	0.00957854	0.0527003
I	1672507	STR_997	1	All	9691	0.00957854	0.0527003
I	1672507	STR_997	4	All	9691	0.00191571	0.0527003
I	1672507	STR_997	2	All	9691	0.00574713	0.0527003
I	1676445	STR_999	0	All	9691	0.898798	0.181921
I	1676445	STR_999	1	All	9691	0.101202	0.181921
I	1676835	STR_1000	0	All	9691	0.312625	0.44342
I	1676835	STR_1000	3	All	9691	0.677355	0.44342
I	1676835	STR_1000	1	All	9691	0.00400802	0.44342
I	1676835	STR_1000	2	All	9691	0.00400802	0.44342
I	1676835	STR_1000	4	All	9691	0.00200401	0.44342
I	1680039	STR_1003	0	All	9691	0.997154	0.00568
I	1680039	STR_1003	1	All	9691	0.00189753	0.00568
I	1686340	STR_1008	0	All	9691	0.899408	0.18342
I	1686340	STR_1008	1	All	9691	0.00394477	0.18342
I	1686340	STR_1008	3	All	9691	0.00986193	0.18342
I	1686340	STR_1008	2	All	9691	0.086785	0.18342
I	1689074	STR_1009	0	All	9691	0.984023	0.0315221
I	1689074	STR_1009	3	All	9691	0.0131579	0.0315221
I	1689074	STR_1009	2	All	9691	0.0018797	0.0315221
I	1693130	STR_1011	0	All	9691	0.944444	0.107094
I	1693130	STR_1011	3	All	9691	0.0210728	0.107094
I	1693130	STR_1011	2	All	9691	0.00383142	0.107094
I	1693130	STR_1011	4	All	9691	0.0143678	0.107094
I	1693130	STR_1011	1	All	9691	0.0162835	0.107094
I	1695206	STR_1012	0	All	9691	0.97541	0.0480634
I	1695206	STR_1012	2	All	9691	0.022541	0.0480634
I	1695206	STR_1012	1	All	9691	0.00204918	0.0480634
I	1698108	STR_1015	0	All	9691	0.761711	0.390315
I	1698108	STR_1015	2	All	9691	0.155804	0.390315
I	1698108	STR_1015	1	All	9691	0.0712831	0.390315
I	1698108	STR_1015	3	All	9691	0.0112016	0.390315
I	1702399	STR_1017	0	All	9691	0.998095	0.00380227
I	1702399	STR_1017	1	All	9691	0.00190476	0.00380227
I	1703936	STR_1018	0	All	9691	0.920543	0.147903
I	1703936	STR_1018	1	All	9691	0.00193798	0.147903
I	1703936	STR_1018	3	All	9691	0.0678295	0.147903
I	1703936	STR_1018	2	All	9691	0.00968992	0.147903
I	1704192	STR_1019	0	All	9691	0.875	0.226358
I	1704192	STR_1019	3	All	9691	0.0467557	0.226358
I	1704192	STR_1019	1	All	9691	0.0763359	0.226358
I	1704192	STR_1019	2	All	9691	0.0019084	0.226358
I	1707814	STR_1021	0	All	9691	0.998099	0.00379505
I	1707814	STR_1021	1	All	9691	0.00190114	0.00379505
I	1715230	STR_1029	0	All	9691	0.228831	0.480467
I	1715230	STR_1029	4	All	9691	0.679435	0.480467
I	1715230	STR_1029	2	All	9691	0.0725806	0.480467
I	1715230	STR_1029	3	All	9691	0.016129	0.480467
I	1715230	STR_1029	1	All	9691	0.00302419	0.480467
I	1719330	STR_1032	0	All	9691	0.860672	0.241675
I	1719330	STR_1032	2	All	9691	0.132411	0.241675
I	1719330	STR_1032	3	All	9691	0.00592885	0.241675
I	1720716	STR_1034	0	All	9691	0.973214	0.0522841
I	1720716	STR_1034	2	All	9691	0.0238095	0.0522841
I	1722197	STR_1035	0	All	9691	0.428161	0.614981
I	1722197	STR_1035	2	All	9691	0.43295	0.614981
I	1722197	STR_1035	1	All	9691	0.117816	0.614981
I	1722197	STR_1035	4	All	9691	0.00191571	0.614981
I	1722197	STR_1035	3	All	9691	0.0191571	0.614981
I	1722593	STR_1036	0	All	9691	0.465235	0.6307
I	1722593	STR_1036	6	All	9691	0.378323	0.6307
I	1722593	STR_1036	7	All	9691	0.0899796	0.6307
I	1722593	STR_1036	4	All	9691	0.0337423	0.6307
I	1722593	STR_1036	2	All	9691	0.00817996	0.6307
I	1722593	STR_1036	5	All	9691	0.0204499	0.6307
I	1722593	STR_1036	1	All	9691	0.00204499	0.6307
I	1722593	STR_1036	3	All	9691	0.00204499	0.6307
I	1777434	STR_1067	0	All	9691	0.951076	0.0938798
I	1777434	STR_1067	4	All	9691	0.00587084	0.0938798
I	1777434	STR_1067	2	All	9691	0.0391389	0.0938798
I	1777434	STR_1067	1	All	9691	0.00195695	0.0938798
I	1777434	STR_1067	3	All	9691	0.00195695	0.0938798
I	1778833	STR_1068	0	All	9691	0.795547	0.341884
I	1778833	STR_1068	2	All	9691	0.15587	0.341884
I	1778833	STR_1068	4	All	9691	0.00809717	0.341884
I	1778833	STR_1068	5	All	9691	0.0283401	0.341884
I	1778833	STR_1068	3	All	9691	0.00607287	0.341884
I	1778833	STR_1068	6	All	9691	0.00202429	0.341884
I	1778833	STR_1068	1	All	9691	0.00404858	0.341884
I	1780131	STR_1071	0	All	9691	0.977358	0.0443361
I	1780131	STR_1071	1	All	9691	0.0207547	0.0443361
I	1780131	STR_1071	2	All	9691	0.00188679	0.0443361
I	1836423	STR_1081	0	All	9691	0.208087	0.364469
I	1836423	STR_1081	2	All	9691	0.769231	0.364469
I	1836423	STR_1081	1	All	9691	0.0226824	0.364469
I	1836995	STR_1085	0	All	9691	0.138462	0.254963
I	1836995	STR_1085	2	All	9691	0.851923	0.254963
I	1836995	STR_1085	1	All	9691	0.00961538	0.254963
I	1837036	STR_1086	0	All	9691	0.952885	0.0912777
I	1837036	STR_1086	1	All	9691	0.0134615	0.0912777
I	1837036	STR_1086	4	All	9691	0.0134615	0.0912777
I	1837036	STR_1086	2	All	9691	0.0192308	0.0912777
I	1837197	STR_1087	0	All	9691	0.81992	0.312839
I	1837197	STR_1087	2	All	9691	0.056338	0.312839
I	1837197	STR_1087	5	All	9691	0.107646	0.312839
I	1837197	STR_1087	6	All	9691	0.0110664	0.312839
I	1837197	STR_1087	3	All	9691	0.00201207	0.312839
I	1837197	STR_1087	4	All	9691	0.00201207	0.312839
I	1837272	STR_1088	0	All	9691	0.99802	0.00395255
I	1837272	STR_1088	1	All	9691	0.0019802	0.00395255
I	1839431	STR_1090	0	All	9691	0.998054	0.00388348
I	1839431	STR_1090	1	All	9691	0.00194553	0.00388348
I	1839841	STR_1091	0	All	9691	0.989899	0.019998
I	1839841	STR_1091	1	All	9691	0.010101	0.019998
I	1847054	STR_1098	0	All	9691	0.121857	0.214016
I	1847054	STR_1098	1	All	9691	0.878143	0.214016
I	1861318	STR_1102	0	All	9691	0.894231	0.192707
I	1861318	STR_1102	4	All	9691	0.00961538	0.192707
I	1861318	STR_1102	2	All	9691	0.00192308	0.192707
I	1861318	STR_1102	1	All	9691	0.0865385	0.192707
I	1861318	STR_1102	3	All	9691	0.00769231	0.192707
I	1873931	STR_1115	0	All	9691	0.829243	0.283888
I	1873931	STR_1115	2	All	9691	0.168712	0.283888
I	1873931	STR_1115	1	All	9691	0.00204499	0.283888
I	1882253	STR_1121	0	All	9691	0.256436	0.424317
I	1882253	STR_1121	1	All	9691	0.713861	0.424317
I	1882253	STR_1121	4	All	9691	0.00990099	0.424317
I	1882253	STR_1121	3	All	9691	0.0138614	0.424317
I	1882253	STR_1121	2	All	9691	0.00594059	0.424317
I	1891728	STR_1122	0	All	9691	0.961464	0.0749774
I	1891728	STR_1122	4	All	9691	0.00192678	0.0749774
I	1891728	STR_1122	1	All	9691	0.0231214	0.0749774
I	1891728	STR_1122	2	All	9691	0.00578035	0.0749774
I	1891728	STR_1122	3	All	9691	0.00192678	0.0749774
I	1891728	STR_1122	5	All	9691	0.00578035	0.0749774
I	1892891	STR_1123	0	All	9691	0.992453	0.0149804
I	1892891	STR_1123	1	All	9691	0.00754717	0.0149804
I	1893657	STR_1124	0	All	9691	0.99522	0.00952184
I	1893657	STR_1124	2	All	9691	0.00382409	0.00952184
I	1911786	STR_1140	0	All	9691	0.43633	0.531309
I	1911786	STR_1140	2	All	9691	0.526217	0.531309
I	1911786	STR_1140	1	All	9691	0.0374532	0.531309
I	1917731	STR_1142	0	All	9691	0.905325	0.17406
I	1917731	STR_1142	2	All	9691	0.0788955	0.17406
I	1917731	STR_1142	4	All	9691	0.00591716	0.17406
I	1917731	STR_1142	1	All	9691	0.00197239	0.17406
I	1917731	STR_1142	3	All	9691	0.00788955	0.17406
I	1942523	STR_1159	0	All	9691	0.355556	0.518729
I	1942523	STR_1159	3	All	9691	0.594949	0.518729
I	1942523	STR_1159	5	All	9691	0.0040404	0.518729
I	1942523	STR_1159	2	All	9691	0.0222222	0.518729
I	1942523	STR_1159	6	All	9691	0.0020202	0.518729
I	1942523	STR_1159	4	All	9691	0.0191919	0.518729
I	1942523	STR_1159	1	All	9691	0.0020202	0.518729
I	1967896	STR_1185	0	All	9691	0.985915	0.027918
I	1967896	STR_1185	5	All	9691	0.00603622	0.027918
I	1967896	STR_1185	3	All	9691	0.00201207	0.027918
I	1967896	STR_1185	1	All	9691	0.00201207	0.027918
I	1967896	STR_1185	4	All	9691	0.00201207	0.027918
I	1973743	STR_1189	0	All	9691	0.968868	0.0604361
I	1973743	STR_1189	2	All	9691	0.0292453	0.0604361
I	1973803	STR_1190	0	All	9691	0.99503	0.00989886
I	1973803	STR_1190	2	All	9691	0.00397614	0.00989886
I	1994233	STR_1203	0	All	9691	0.37963	0.47736
I	1994233	STR_1203	3	All	9691	0.615226	0.47736
I	1994233	STR_1203	1	All	9691	0.00411523	0.47736
I	1994233	STR_1203	2	All	9691	0.00102881	0.47736
I	2019631	STR_1213	0	All	9691	0.98419	0.0312222
I	2019631	STR_1213	3	All	9691	0.0118577	0.0312222
I	2019631	STR_1213	2	All	9691	0.00197628	0.0312222
I	2021274	STR_1214	0	All	9691	0.940952	0.112508
I	2021274	STR_1214	1	All	9691	0.0133333	0.112508
I	2021274	STR_1214	2	All	9691	0.0438095	0.112508
I	2021274	STR_1214	3	All	9691	0.00190476	0.112508
I	2026183	STR_1221	0	All	9691	0.943359	0.107277
I	2026183	STR_1221	1	All	9691	0.0527344	0.107277
I	2026183	STR_1221	2	All	9691	0.00390625	0.107277
I	2031812	STR_1227	0	All	9691	0.892655	0.197148
I	2031812	STR_1227	3	All	9691	0.0376648	0.197148
I	2031812	STR_1227	2	All	9691	0.0677966	0.197148
I	2031812	STR_1227	1	All	9691	0.00188324	0.197148
I	2034134	STR_1231	0	All	9691	0.838028	0.276879
I	2034134	STR_1231	2	All	9691	0.143863	0.276879
I	2034134	STR_1231	1	All	9691	0.0100604	0.276879
I	2034134	STR_1231	3	All	9691	0.00402414	0.276879
I	2034134	STR_1231	4	All	9691	0.00402414	0.276879
I	2084601	STR_1244	0	All	9691	0.922414	0.144465
I	2084601	STR_1244	2	All	9691	0.00766284	0.144465
I	2084601	STR_1244	1	All	9691	0.00191571	0.144465
I	2084601	STR_1244	3	All	9691	0.0680077	0.144465
I	2084914	STR_1245	0	All	9691	0.475564	0.530683
I	2084914	STR_1245	4	All	9691	0.492481	0.530683
I	2084914	STR_1245	3	All	9691	0.0244361	0.530683
I	2084914	STR_1245	1	All	9691	0.0037594	0.530683
I	2084914	STR_1245	5	All	9691	0.0018797	0.530683
I	2084914	STR_1245	2	All	9691	0.0018797	0.530683
I	2107479	STR_1250	0	All	9691	0.411885	0.67236
I	2107479	STR_1250	5	All	9691	0.389344	0.67236
I	2107479	STR_1250	10	All	9691	0.0389344	0.67236
I	2107479	STR_1250	3	All	9691	0.0286885	0.67236
I	2107479	STR_1250	11	All	9691	0.00204918	0.67236
I	2107479	STR_1250	8	All	9691	0.0266393	0.67236
I	2107479	STR_1250	4	All	9691	0.0153689	0.67236
I	2107479	STR_1250	6	All	9691	0.0512295	0.67236
I	2107479	STR_1250	1	All	9691	0.0204918	0.67236
I	2107479	STR_1250	12	All	9691	0.00409836	0.67236
I	2107479	STR_1250	2	All	9691	0.00307377	0.67236
I	2107479	STR_1250	9	All	9691	0.00614754	0.67236
I	2107479	STR_1250	7	All	9691	0.00204918	0.67236
I	2107635	STR_1251	0	All	9691	0.99811	0.00377357
I	2107635	STR_1251	1	All	9691	0.00189036	0.00377357
I	2117090	STR_1258	0	All	9691	0.670297	0.442649
I	2117090	STR_1258	1	All	9691	0.328713	0.442649
I	2128775	STR_1272	0	All	9691	0.999049	0.00189933
I	2130217	STR_1273	0	All	9691	0.925662	0.140258
I	2130217	STR_1273	1	All	9691	0.0478615	0.140258
I	2130217	STR_1273	3	All	9691	0.0244399	0.140258
I	2130217	STR_1273	2	All	9691	0.00203666	0.140258
I	2152075	STR_1289	0	All	9691	0.969349	0.0597099
I	2152075	STR_1289	2	All	9691	0.0249042	0.0597099
I	2152075	STR_1289	1	All	9691	0.00574713	0.0597099
I	2155991	STR_1295	0	All	9691	0.986965	0.0257725
I	2155991	STR_1295	2	All	9691	0.0018622	0.0257725
I	2155991	STR_1295	1	All	9691	0.0111732	0.0257725
I	2157143	STR_1297	0	All	9691	0.927903	0.136765
I	2157143	STR_1297	2	All	9691	0.0421348	0.136765
I	2157143	STR_1297	1	All	9691	0.0131086	0.136765
I	2157143	STR_1297	3	All	9691	0.0168539	0.136765
I	2173000	STR_1321	0	All	9691	0.92278	0.142805
I	2173000	STR_1321	2	All	9691	0.0752896	0.142805
I	2173000	STR_1321	1	All	9691	0.0019305	0.142805
I	2173129	STR_1322	0	All	9691	0.190184	0.314627
I	2173129	STR_1322	3	All	9691	0.805726	0.314627
I	2173129	STR_1322	2	All	9691	0.00204499	0.314627
I	2173129	STR_1322	1	All	9691	0.00204499	0.314627
I	2186285	STR_1332	0	All	9691	0.895792	0.193407
I	2186285	STR_1332	7	All	9691	0.0621242	0.193407
I	2186285	STR_1332	4	All	9691	0.01002	0.193407
I	2186285	STR_1332	2	All	9691	0.00601202	0.193407
I	2186285	STR_1332	9	All	9691	0.00200401	0.193407
I	2186285	STR_1332	10	All	9691	0.00601202	0.193407
I	2186285	STR_1332	1	All	9691	0.00200401	0.193407
I	2186285	STR_1332	8	All	9691	0.01002	0.193407
I	2186285	STR_1332	11	All	9691	0.00200401	0.193407
I	2186285	STR_1332	6	All	9691	0.00200401	0.193407
I	2187265	STR_1335	0	All	9691	0.969246	0.0599667
I	2187265	STR_1335	1	All	9691	0.0238095	0.0599667
I	2187265	STR_1335	2	All	9691	0.00198413	0.0599667
I	2187265	STR_1335	3	All	9691	0.00496032	0.0599667
I	2190601	STR_1341	0	All	9691	0.133981	0.632618
I	2190601	STR_1341	2	All	9691	0.427184	0.632618
I	2190601	STR_1341	4	All	9691	0.407767	0.632618
I	2190601	STR_1341	3	All	9691	0.0252427	0.632618
I	2190601	STR_1341	1	All	9691	0.00582524	0.632618
I	2191399	STR_1345	0	All	9691	0.959245	0.0784814
I	2191399	STR_1345	1	All	9691	0.00397614	0.0784814
I	2191399	STR_1345	2	All	9691	0.0367793	0.0784814
I	2191504	STR_1346	0	All	9691	0.43014	0.68174
I	2191504	STR_1346	3	All	9691	0.163673	0.68174
I	2191504	STR_1346	7	All	9691	0.321357	0.68174
I	2191504	STR_1346	6	All	9691	0.0528942	0.68174
I	2191504	STR_1346	8	All	9691	0.0179641	0.68174
I	2191504	STR_1346	1	All	9691	0.00399202	0.68174
I	2191504	STR_1346	2	All	9691	0.00598802	0.68174
I	2191504	STR_1346	5	All	9691	0.00199601	0.68174
I	2191504	STR_1346	4	All	9691	0.00199601	0.68174
I	2193909	STR_1347	0	All	9691	0.746109	0.429607
I	2193909	STR_1347	6	All	9691	0.07393	0.429607
I	2193909	STR_1347	9	All	9691	0.0330739	0.429607
I	2193909	STR_1347	8	All	9691	0.0700389	0.429607
I	2193909	STR_1347	7	All	9691	0.0447471	0.429607
I	2193909	STR_1347	4	All	9691	0.0077821	0.429607
I	2193909	STR_1347	3	All	9691	0.0107004	0.429607
I	2193909	STR_1347	10	All	9691	0.0077821	0.429607
I	2193909	STR_1347	5	All	9691	0.00194553	0.429607
I	2193909	STR_1347	1	All	9691	0.00194553	0.429607
I	2193909	STR_1347	2	All	9691	0.00194553	0.429607
I	2196580	STR_1351	0	All	9691	0.803774	0.315443
I	2196580	STR_1351	1	All	9691	0.196226	0.315443
I	2209513	STR_1359	0	All	9691	0.913442	0.160803
I	2209513	STR_1359	2	All	9691	0.0672098	0.160803
I	2209513	STR_1359	3	All	9691	0.0173116	0.160803
I	2212244	STR_1362	0	All	9691	0.376908	0.492751
I	2212244	STR_1362	2	All	9691	0.604008	0.492751
I	2212244	STR_1362	1	All	9691	0.019084	0.492751
I	2215898	STR_1365	0	All	9691	0.854617	0.265394
I	2215898	STR_1365	4	All	9691	0.0520629	0.265394
I	2215898	STR_1365	9	All	9691	0.0206287	0.265394
I	2215898	STR_1365	1	All	9691	0.00785855	0.265394
I	2215898	STR_1365	2	All	9691	0.00982318	0.265394
I	2215898	STR_1365	5	All	9691	0.0235756	0.265394
I	2215898	STR_1365	7	All	9691	0.0137525	0.265394
I	2215898	STR_1365	3	All	9691	0.0137525	0.265394
I	2215898	STR_1365	8	All	9691	0.00196464	0.265394
I	2215898	STR_1365	6	All	9691	0.00196464	0.265394
I	2217100	STR_1366	0	All	9691	0.986564	0.0265104
I	2217100	STR_1366	1	All	9691	0.0134357	0.0265104
I	2217475	STR_1367	0	All	9691	0.996234	0.00750458
I	2217475	STR_1367	1	All	9691	0.00376648	0.00750458
I	2234246	STR_1372	0	All	9691	0.960076	0.0768046
I	2234246	STR_1372	2	All	9691	0.00190114	0.0768046
I	2234246	STR_1372	1	All	9691	0.0380228	0.0768046
I	2237603	STR_1373	0	All	9691	0.682432	0.496692
I	2237603	STR_1373	2	All	9691	0.160232	0.496692
I	2237603	STR_1373	5	All	9691	0.102317	0.496692
I	2237603	STR_1373	1	All	9691	0.0337838	0.496692
I	2237603	STR_1373	3	All	9691	0.0173745	0.496692
I	2237603	STR_1373	6	All	9691	0.0019305	0.496692
I	2237603	STR_1373	4	All	9691	0.0019305	0.496692
I	2248961	STR_1377	0	All	9691	0.133595	0.27454
I	2248961	STR_1377	3	All	9691	0.840864	0.27454
I	2248961	STR_1377	2	All	9691	0.0235756	0.27454
I	2248961	STR_1377	1	All	9691	0.00196464	0.27454
I	2260280	STR_1382	0	All	9691	0.573964	0.600654
I	2260280	STR_1382	1	All	9691	0.00197239	0.600654
I	2260280	STR_1382	7	All	9691	0.0502959	0.600654
I	2260280	STR_1382	6	All	9691	0.177515	0.600654
I	2260280	STR_1382	3	All	9691	0.189349	0.600654
I	2260280	STR_1382	8	All	9691	0.000986193	0.600654
I	2260280	STR_1382	5	All	9691	0.00197239	0.600654
I	2260280	STR_1382	4	All	9691	0.00197239	0.600654
I	2260280	STR_1382	2	All	9691	0.00197239	0.600654
I	2277306	STR_1388	0	All	9691	0.81543	0.30847
I	2277306	STR_1388	1	All	9691	0.0175781	0.30847
I	2277306	STR_1388	2	All	9691	0.162109	0.30847
I	2277306	STR_1388	3	All	9691	0.00390625	0.30847
I	2293062	STR_1396	0	All	9691	0.361217	0.61696
I	2293062	STR_1396	4	All	9691	0.48289	0.61696
I	2293062	STR_1396	5	All	9691	0.138783	0.61696
I	2293062	STR_1396	3	All	9691	0.0095057	0.61696
I	2293062	STR_1396	1	All	9691	0.00380228	0.61696
I	2293062	STR_1396	2	All	9691	0.00380228	0.61696
I	2299643	STR_1399	0	All	9691	0.768797	0.382125
I	2299643	STR_1399	3	All	9691	0.0798872	0.382125
I	2299643	STR_1399	4	All	9691	0.142857	0.382125
I	2299643	STR_1399	5	All	9691	0.0056391	0.382125
I	2299643	STR_1399	2	All	9691	0.00093985	0.382125
I	2299812	STR_1400	0	All	9691	0.656064	0.519999
I	2299812	STR_1400	3	All	9691	0.206759	0.519999
I	2299812	STR_1400	2	All	9691	0.0685885	0.519999
I	2299812	STR_1400	4	All	9691	0.028827	0.519999
I	2299812	STR_1400	5	All	9691	0.00397614	0.519999
I	2299812	STR_1400	1	All	9691	0.0357853	0.519999
I	2304433	STR_1401	0	All	9691	0.945507	0.105007
I	2304433	STR_1401	3	All	9691	0.0124283	0.105007
I	2304433	STR_1401	2	All	9691	0.0152964	0.105007
I	2304433	STR_1401	1	All	9691	0.0248566	0.105007
I	2304433	STR_1401	4	All	9691	0.00191205	0.105007
I	2327619	STR_1404	0	All	9691	0.461538	0.520828
I	2327619	STR_1404	1	All	9691	0.515385	0.520828
I	2327619	STR_1404	2	All	9691	0.0230769	0.520828
I	2371467	STR_1420	0	All	9691	0.986767	0.0261863
I	2371467	STR_1420	1	All	9691	0.00378072	0.0261863
I	2371467	STR_1420	2	All	9691	0.0094518	0.0261863
I	2377191	STR_1427	0	All	9691	0.999065	0.00186741
I	2377357	STR_1428	0	All	9691	0.905642	0.173453
I	2377357	STR_1428	2	All	9691	0.0116732	0.173453
I	2377357	STR_1428	3	All	9691	0.0787938	0.173453
I	2377357	STR_1428	1	All	9691	0.00389105	0.173453
I	2384727	STR_1435	0	All	9691	0.677291	0.491121
I	2384727	STR_1435	1	All	9691	0.212151	0.491121
I	2384727	STR_1435	4	All	9691	0.0657371	0.491121
I	2384727	STR_1435	5	All	9691	0.00199203	0.491121
I	2384727	STR_1435	6	All	9691	0.0249004	0.491121
I	2384727	STR_1435	3	All	9691	0.0139442	0.491121
I	2384727	STR_1435	7	All	9691	0.00199203	0.491121
I	2384727	STR_1435	2	All	9691	0.00199203	0.491121
I	2390711	STR_1439	0	All	9691	0.986653	0.0264811
I	2390711	STR_1439	4	All	9691	0.00205339	0.0264811
I	2390711	STR_1439	1	All	9691	0.00205339	0.0264811
I	2390711	STR_1439	5	All	9691	0.00205339	0.0264811
I	2390711	STR_1439	6	All	9691	0.00410678	0.0264811
I	2390711	STR_1439	2	All	9691	0.00205339	0.0264811
I	2390969	STR_1440	0	All	9691	0.975564	0.0479323
I	2390969	STR_1440	2	All	9691	0.0169173	0.0479323
I	2390969	STR_1440	1	All	9691	0.0075188	0.0479323
I	2391513	STR_1441	0	All	9691	0.853167	0.257546
I	2391513	STR_1441	3	All	9691	0.0191939	0.257546
I	2391513	STR_1441	5	All	9691	0.119002	0.257546
I	2391513	STR_1441	1	All	9691	0.00191939	0.257546
I	2391513	STR_1441	2	All	9691	0.00479846	0.257546
I	2391513	STR_1441	4	All	9691	0.00191939	0.257546
I	2400773	STR_1450	0	All	9691	0.99498	0.00998976
I	2400773	STR_1450	1	All	9691	0.00502008	0.00998976
I	2415451	STR_1457	0	All	9691	0.464066	0.53169
I	2415451	STR_1457	3	All	9691	0.502053	0.53169
I	2415451	STR_1457	4	All	9691	0.0297741	0.53169
I	2415451	STR_1457	2	All	9691	0.00205339	0.53169
I	2415451	STR_1457	1	All	9691	0.00205339	0.53169
I	2420372	STR_1461	0	All	9691	0.980431	0.0386487
I	2420372	STR_1461	4	All	9691	0.00587084	0.0386487
I	2420372	STR_1461	3	All	9691	0.00587084	0.0386487
I	2420372	STR_1461	2	All	9691	0.00587084	0.0386487
I	2420372	STR_1461	1	All	9691	0.00195695	0.0386487
I	2450895	STR_1464	0	All	9691	0.943182	0.10718
I	2450895	STR_1464	1	All	9691	0.0568182	0.10718
I	2464611	STR_1473	0	All	9691	0.850095	0.265163
I	2464611	STR_1473	5	All	9691	0.0104364	0.265163
I	2464611	STR_1473	4	All	9691	0.0275142	0.265163
I	2464611	STR_1473	1	All	9691	0.00379507	0.265163
I	2464611	STR_1473	2	All	9691	0.106262	0.265163
I	2464611	STR_1473	3	All	9691	0.00189753	0.265163
I	2496671	STR_1502	0	All	9691	0.988462	0.0228772
I	2496671	STR_1502	1	All	9691	0.00769231	0.0228772
I	2496671	STR_1502	3	All	9691	0.00192308	0.0228772
I	2496671	STR_1502	2	All	9691	0.00192308	0.0228772
I	2540182	STR_1517	0	All	9691	0.744856	0.382672
I	2540182	STR_1517	1	All	9691	0.25	0.382672
I	2540182	STR_1517	2	All	9691	0.00411523	0.382672
I	2559910	STR_1523	0	All	9691	0.814286	0.302449
I	2559910	STR_1523	1	All	9691	0.185714	0.302449
I	2580385	STR_1531	3	All	9691	0.625	0.475945
I	2580385	STR_1531	0	All	9691	0.365234	0.475945
I	2580385	STR_1531	2	All	9691	0.00390625	0.475945
I	2580385	STR_1531	1	All	9691	0.00390625	0.475945
I	2580385	STR_1531	4	All	9691	0.00195312	0.475945
I	2591860	STR_1538	4	All	9691	0.328571	0.741143
I	2591860	STR_1538	0	All	9691	0.316327	0.741143
I	2591860	STR_1538	7	All	9691	0.172449	0.741143
I	2591860	STR_1538	1	All	9691	0.143878	0.741143
I	2591860	STR_1538	6	All	9691	0.0102041	0.741143
I	2591860	STR_1538	8	All	9691	0.0142857	0.741143
I	2591860	STR_1538	3	All	9691	0.00408163	0.741143
I	2591860	STR_1538	2	All	9691	0.00816327	0.741143
I	2591860	STR_1538	5	All	9691	0.00204082	0.741143
I	2603836	STR_1542	0	All	9691	0.984344	0.0308746
I	2603836	STR_1542	1	All	9691	0.0136986	0.0308746
I	2603836	STR_1542	2	All	9691	0.00195695	0.0308746
I	2605362	STR_1544	0	All	9691	0.988722	0.022302
I	2605362	STR_1544	1	All	9691	0.0112782	0.022302
I	2605717	STR_1545	0	All	9691	0.987976	0.0237991
I	2605717	STR_1545	2	All	9691	0.01002	0.0237991
I	2607188	STR_1547	0	All	9691	0.911985	0.160537
I	2607188	STR_1547	1	All	9691	0.088015	0.160537
I	2613175	STR_1549	0	All	9691	0.950192	0.0951616
I	2613175	STR_1549	1	All	9691	0.0440613	0.0951616
I	2613175	STR_1549	2	All	9691	0.00574713	0.0951616
I	2617211	STR_1550	0	All	9691	0.972672	0.0531622
I	2617211	STR_1550	1	All	9691	0.0273279	0.0531622
I	2622201	STR_1553	3	All	9691	0.262097	0.617616
I	2622201	STR_1553	0	All	9691	0.532258	0.617616
I	2622201	STR_1553	2	All	9691	0.172379	0.617616
I	2622201	STR_1553	5	All	9691	0.0252016	0.617616
I	2622201	STR_1553	4	All	9691	0.00604839	0.617616
I	2622201	STR_1553	1	All	9691	0.00201613	0.617616
I	2634444	STR_1560	0	All	9691	0.958171	0.0805936
I	2634444	STR_1560	3	All	9691	0.0359922	0.0805936
I	2634444	STR_1560	1	All	9691	0.00389105	0.0805936
I	2634444	STR_1560	2	All	9691	0.00194553	0.0805936
I	2649610	STR_1561	0	All	9691	0.923156	0.144793
I	2649610	STR_1561	2	All	9691	0.0471311	0.144793
I	2649610	STR_1561	1	All	9691	0.00204918	0.144793
I	2649610	STR_1561	3	All	9691	0.0276639	0.144793
I	2653034	STR_1563	0	All	9691	0.99906	0.00187793
I	2654760	STR_1565	0	All	9691	0.875752	0.228013
I	2654760	STR_1565	1	All	9691	0.0631263	0.228013
I	2654760	STR_1565	5	All	9691	0.0210421	0.228013
I	2654760	STR_1565	4	All	9691	0.00801603	0.228013
I	2654760	STR_1565	6	All	9691	0.00801603	0.228013
I	2654760	STR_1565	3	All	9691	0.00200401	0.228013
I	2654760	STR_1565	2	All	9691	0.0220441	0.228013
I	2661216	STR_1572	0	All	9691	0.932099	0.127995
I	2661216	STR_1572	1	All	9691	0.0555556	0.127995
I	2661216	STR_1572	2	All	9691	0.00205761	0.127995
I	2661216	STR_1572	3	All	9691	0.0102881	0.127995
I	2668070	STR_1575	0	All	9691	0.995902	0.00816313
I	2668070	STR_1575	1	All	9691	0.00409836	0.00816313
I	2676850	STR_1579	0	All	9691	0.841556	0.28034
I	2676850	STR_1579	5	All	9691	0.097723	0.28034
I	2676850	STR_1579	4	All	9691	0.00759013	0.28034
I	2676850	STR_1579	2	All	9691	0.0417457	0.28034
I	2676850	STR_1579	1	All	9691	0.00189753	0.28034
I	2676850	STR_1579	3	All	9691	0.00948767	0.28034
I	2682957	STR_1582	0	All	9691	0.712008	0.415396
I	2682957	STR_1582	1	All	9691	0.00375235	0.415396
I	2682957	STR_1582	4	All	9691	0.278612	0.415396
I	2682957	STR_1582	5	All	9691	0.00187617	0.415396
I	2682957	STR_1582	2	All	9691	0.00187617	0.415396
I	2682957	STR_1582	3	All	9691	0.00187617	0.415396
I	2683025	STR_1583	0	All	9691	0.731827	0.412915
I	2683025	STR_1583	2	All	9691	0.223969	0.412915
I	2683025	STR_1583	1	All	9691	0.00392927	0.412915
I	2683025	STR_1583	4	All	9691	0.0363458	0.412915
I	2683025	STR_1583	3	All	9691	0.00392927	0.412915
I	2694867	STR_1589	0	All	9691	0.998051	0.00389104
I	2697292	STR_1592	0	All	9691	0.988679	0.0224493
I	2697292	STR_1592	2	All	9691	0.00754717	0.0224493
I	2697292	STR_1592	3	All	9691	0.00188679	0.0224493
I	2697292	STR_1592	1	All	9691	0.00188679	0.0224493
I	2703446	STR_1595	1	All	9691	0.270038	0.416109
I	2703446	STR_1595	0	All	9691	0.714695	0.416109
I	2703446	STR_1595	3	All	9691	0.0133588	0.416109
I	2703446	STR_1595	2	All	9691	0.0019084	0.416109
I	2709669	STR_1597	0	All	9691	0.99812	0.00375233
I	2709669	STR_1597	1	All	9691	0.0018797	0.00375233
I	2728792	STR_1601	0	All	9691	0.687755	0.44737
I	2728792	STR_1601	1	All	9691	0.280612	0.44737
I	2728792	STR_1601	2	All	9691	0.0295918	0.44737
I	2728792	STR_1601	3	All	9691	0.00204082	0.44737
I	2728877	STR_1602	0	All	9691	0.969981	0.0586735
I	2728877	STR_1602	3	All	9691	0.00844278	0.0586735
I	2728877	STR_1602	1	All	9691	0.0196998	0.0586735
I	2728877	STR_1602	2	All	9691	0.00187617	0.0586735
I	2728975	STR_1603	0	All	9691	0.628759	0.470965
I	2728975	STR_1603	1	All	9691	0.365602	0.470965
I	2728975	STR_1603	2	All	9691	0.0056391	0.470965
I	2729036	STR_1604	0	All	9691	0.983146	0.0333011
I	2729036	STR_1604	3	All	9691	0.0093633	0.0333011
I	2729036	STR_1604	1	All	9691	0.00561798	0.0333011
I	2729036	STR_1604	2	All	9691	0.00187266	0.0333011
I	2739891	STR_1606	0	All	9691	0.994208	0.0115308
I	2739891	STR_1606	1	All	9691	0.003861	0.0115308
I	2739891	STR_1606	2	All	9691	0.0019305	0.0115308
I	2741373	STR_1608	0	All	9691	0.938433	0.116862
I	2741373	STR_1608	1	All	9691	0.0485075	0.116862
I	2741373	STR_1608	3	All	9691	0.011194	0.116862
I	2741373	STR_1608	2	All	9691	0.00186567	0.116862
I	2744600	STR_1610	3	All	9691	0.722555	0.418429
I	2744600	STR_1610	0	All	9691	0.241517	0.418429
I	2744600	STR_1610	2	All	9691	0.0339321	0.418429
I	2744600	STR_1610	1	All	9691	0.00199601	0.418429
I	2750383	STR_1611	0	All	9691	0.996176	0.00762625
I	2750383	STR_1611	2	All	9691	0.00191205	0.00762625
I	2750383	STR_1611	1	All	9691	0.00191205	0.00762625
I	2750932	STR_1613	0	All	9691	0.971899	0.0547236
I	2750932	STR_1613	2	All	9691	0.0261628	0.0547236
I	2750932	STR_1613	1	All	9691	0.00193798	0.0547236
I	2753752	STR_1614	0	All	9691	0.954637	0.0876264
I	2753752	STR_1614	2	All	9691	0.0252016	0.0876264
I	2753752	STR_1614	1	All	9691	0.0201613	0.0876264
I	2757849	STR_1617	0	All	9691	0.90081	0.185719
I	2757849	STR_1617	6	All	9691	0.00607287	0.185719
I	2757849	STR_1617	5	All	9691	0.0263158	0.185719
I	2757849	STR_1617	1	All	9691	0.0161943	0.185719
I	2757849	STR_1617	3	All	9691	0.0425101	0.185719
I	2757849	STR_1617	7	All	9691	0.00202429	0.185719
I	2757849	STR_1617	2	All	9691	0.00202429	0.185719
I	2757849	STR_1617	4	All	9691	0.00404858	0.185719
I	2759261	STR_1618	0	All	9691	0.983654	0.0322356
I	2759261	STR_1618	1	All	9691	0.00288462	0.0322356
I	2759261	STR_1618	2	All	9691	0.0134615	0.0322356
I	2759974	STR_1619	1	All	9691	0.549808	0.517843
I	2759974	STR_1619	0	All	9691	0.423372	0.517843
I	2759974	STR_1619	3	All	9691	0.0249042	0.517843
I	2759974	STR_1619	2	All	9691	0.00191571	0.517843
I	2760156	STR_1620	5	All	9691	0.25504	0.544349
I	2760156	STR_1620	4	All	9691	0.110887	0.544349
I	2760156	STR_1620	0	All	9691	0.614919	0.544349
I	2760156	STR_1620	1	All	9691	0.0131048	0.544349
I	2760156	STR_1620	2	All	9691	0.00201613	0.544349
I	2760156	STR_1620	3	All	9691	0.00201613	0.544349
I	2760156	STR_1620	6	All	9691	0.00201613	0.544349
I	2761092	STR_1621	0	All	9691	0.992467	0.0149808
I	2761092	STR_1621	1	All	9691	0.00376648	0.0149808
I	2761092	STR_1621	2	All	9691	0.00376648	0.0149808
I	2765347	STR_1628	0	All	9691	0.998141	0.00371056
I	2765347	STR_1628	1	All	9691	0.00185874	0.00371056
I	2765797	STR_1629	0	All	9691	0.994413	0.0111108
I	2765797	STR_1629	1	All	9691	0.00558659	0.0111108
I	2767469	STR_1630	0	All	9691	0.990329	0.0192002
I	2767469	STR_1630	2	All	9691	0.00386847	0.0192002
I	2767469	STR_1630	1	All	9691	0.00580271	0.0192002
I	2768766	STR_1634	0	All	9691	0.922787	0.142786
I	2768766	STR_1634	1	All	9691	0.0753296	0.142786
I	2768766	STR_1634	2	All	9691	0.00188324	0.142786
I	2789058	STR_1637	0	All	9691	0.960526	0.0764387
I	2789058	STR_1637	1	All	9691	0.0300752	0.0764387
I	2789058	STR_1637	2	All	9691	0.0056391	0.0764387
I	2789058	STR_1637	3	All	9691	0.0037594	0.0764387
I	2790151	STR_1638	0	All	9691	0.992467	0.0149737
I	2790151	STR_1638	1	All	9691	0.00564972	0.0149737
I	2790151	STR_1638	2	All	9691	0.00188324	0.0149737
I	2803727	STR_1644	0	All	9691	0.897959	0.189888
I	2803727	STR_1644	2	All	9691	0.0367347	0.189888
I	2803727	STR_1644	1	All	9691	0.044898	0.189888
I	2803727	STR_1644	3	All	9691	0.0204082	0.189888
I	2826987	STR_1655	0	All	9691	0.856719	0.255431
I	2826987	STR_1655	3	All	9691	0.0948617	0.255431
I	2826987	STR_1655	5	All	9691	0.0395257	0.255431
I	2826987	STR_1655	4	All	9691	0.00592885	0.255431
I	2826987	STR_1655	1	All	9691	0.00197628	0.255431
I	2833510	STR_1658	0	All	9691	0.998081	0.0038314
I	2833510	STR_1658	1	All	9691	0.00191939	0.0038314
I	2835899	STR_1660	0	All	9691	0.983051	0.0334656
I	2835899	STR_1660	1	All	9691	0.0112994	0.0334656
I	2835899	STR_1660	3	All	9691	0.00376648	0.0334656
I	2835899	STR_1660	2	All	9691	0.00188324	0.0334656
I	2840162	STR_1662	4	All	9691	0.464143	0.541896
I	2840162	STR_1662	1	All	9691	0.0159363	0.541896
I	2840162	STR_1662	0	All	9691	0.492032	0.541896
I	2840162	STR_1662	2	All	9691	0.0159363	0.541896
I	2840162	STR_1662	3	All	9691	0.00796813	0.541896
I	2840162	STR_1662	5	All	9691	0.00199203	0.541896
I	2840162	STR_1662	6	All	9691	0.00199203	0.541896
I	2845907	STR_1667	0	All	9691	0.997959	0.0040733
I	2845907	STR_1667	1	All	9691	0.00204082	0.0040733
I	2846148	STR_1668	2	All	9691	0.647228	0.45799
I	2846148	STR_1668	0	All	9691	0.35086	0.45799
I	2846148	STR_1668	1	All	9691	0.00191205	0.45799
I	2852492	STR_1670	2	All	9691	0.490196	0.501799
I	2852492	STR_1670	0	All	9691	0.507843	0.501799
I	2852492	STR_1670	1	All	9691	0.00196078	0.501799
I	2864252	STR_1679	2	All	9691	0.523256	0.518478
I	2864252	STR_1679	0	All	9691	0.455426	0.518478
I	2864252	STR_1679	3	All	9691	0.0174419	0.518478
I	2864252	STR_1679	4	All	9691	0.00193798	0.518478
I	2864252	STR_1679	1	All	9691	0.00193798	0.518478
I	2869358	STR_1684	0	All	9691	0.867284	0.236039
I	2869358	STR_1684	2	All	9691	0.106996	0.236039
I	2869358	STR_1684	1	All	9691	0.0133745	0.236039
I	2869358	STR_1684	3	All	9691	0.0123457	0.236039
I	2878354	STR_1687	0	All	9691	0.926758	0.138628
I	2878354	STR_1687	3	All	9691	0.0410156	0.138628
I	2878354	STR_1687	4	All	9691	0.0283203	0.138628
I	2878354	STR_1687	1	All	9691	0.00195312	0.138628
I	2878354	STR_1687	2	All	9691	0.00195312	0.138628
I	2880684	STR_1688	0	All	9691	0.861386	0.247452
I	2880684	STR_1688	3	All	9691	0.0990099	0.247452
I	2880684	STR_1688	4	All	9691	0.0237624	0.247452
I	2880684	STR_1688	1	All	9691	0.000990099	0.247452
I	2880684	STR_1688	2	All	9691	0.0138614	0.247452
I	2889654	STR_1695	0	All	9691	0.982318	0.0348926
I	2889654	STR_1695	1	All	9691	0.00392927	0.0348926
I	2889654	STR_1695	3	All	9691	0.0117878	0.0348926
I	2889654	STR_1695	2	All	9691	0.00196464	0.0348926
I	2903888	STR_1703	3	All	9691	0.45499	0.620837
I	2903888	STR_1703	2	All	9691	0.386497	0.620837
I	2903888	STR_1703	0	All	9691	0.150685	0.620837
I	2903888	STR_1703	1	All	9691	0.00782779	0.620837
I	2935926	STR_1718	0	All	9691	0.942748	0.109966
I	2935926	STR_1718	1	All	9691	0.0152672	0.109966
I	2935926	STR_1718	3	All	9691	0.0305344	0.109966
I	2935926	STR_1718	4	All	9691	0.0019084	0.109966
I	2935926	STR_1718	2	All	9691	0.00954198	0.109966
I	2940419	STR_1719	0	All	9691	0.998127	0.0037383
I	2940419	STR_1719	1	All	9691	0.00187266	0.0037383
I	2945812	STR_1721	0	All	9691	0.889764	0.198145
I	2945812	STR_1721	2	All	9691	0.100394	0.198145
I	2945812	STR_1721	1	All	9691	0.00984252	0.198145
I	2960699	STR_1725	0	All	9691	0.998028	0.00393699
I	2960699	STR_1725	1	All	9691	0.00197239	0.00393699
I	2963449	STR_1727	0	All	9691	0.977358	0.0445497
I	2963449	STR_1727	1	All	9691	0.00188679	0.0445497
I	2963449	STR_1727	3	All	9691	0.0113208	0.0445497
I	2963449	STR_1727	2	All	9691	0.00943396	0.0445497
I	2975648	STR_1733	0	All	9691	0.953216	0.0891898
I	2975648	STR_1733	1	All	9691	0.0467836	0.0891898
I	2978545	STR_1734	0	All	9691	0.738776	0.417128
I	2978545	STR_1734	7	All	9691	0.189796	0.417128
I	2978545	STR_1734	3	All	9691	0.0132653	0.417128
I	2978545	STR_1734	1	All	9691	0.0255102	0.417128
I	2978545	STR_1734	4	All	9691	0.00816327	0.417128
I	2978545	STR_1734	8	All	9691	0.0102041	0.417128
I	2978545	STR_1734	2	All	9691	0.00204082	0.417128
I	2978545	STR_1734	6	All	9691	0.00612245	0.417128
I	2978545	STR_1734	5	All	9691	0.00408163	0.417128
I	2978545	STR_1734	9	All	9691	0.00204082	0.417128
I	2980729	STR_1736	0	All	9691	0.524857	0.504171
I	2980729	STR_1736	3	All	9691	0.469407	0.504171
I	2980729	STR_1736	4	All	9691	0.00191205	0.504171
I	2980729	STR_1736	2	All	9691	0.00191205	0.504171
I	2980729	STR_1736	1	All	9691	0.00191205	0.504171
I	2987415	STR_1745	0	All	9691	0.973425	0.0519154
I	2987415	STR_1745	1	All	9691	0.0226378	0.0519154
I	2987415	STR_1745	2	All	9691	0.00393701	0.0519154
I	3001153	STR_1752	0	All	9691	0.801136	0.319751
I	3001153	STR_1752	3	All	9691	0.196023	0.319751
I	3001153	STR_1752	2	All	9691	0.00094697	0.319751
I	3001153	STR_1752	1	All	9691	0.00189394	0.319751
I	3011446	STR_1759	0	All	9691	0.826336	0.295394
I	3011446	STR_1759	4	All	9691	0.0019084	0.295394
I	3011446	STR_1759	5	All	9691	0.146947	0.295394
I	3011446	STR_1759	2	All	9691	0.0019084	0.295394
I	3011446	STR_1759	1	All	9691	0.00572519	0.295394
I	3011446	STR_1759	3	All	9691	0.0114504	0.295394
I	3011446	STR_1759	8	All	9691	0.0019084	0.295394
I	3011446	STR_1759	6	All	9691	0.0019084	0.295394
I	3011446	STR_1759	7	All	9691	0.0019084	0.295394
I	3024904	STR_1772	0	All	9691	0.965714	0.0662204
I	3024904	STR_1772	1	All	9691	0.0342857	0.0662204
I	3033502	STR_1781	0	All	9691	0.849328	0.260548
I	3033502	STR_1781	2	All	9691	0.133397	0.260548
I	3033502	STR_1781	1	All	9691	0.0172745	0.260548
I	3058476	STR_1792	0	All	9691	0.763692	0.389512
I	3058476	STR_1792	1	All	9691	0.121704	0.389512
I	3058476	STR_1792	2	All	9691	0.111562	0.389512
I	3058476	STR_1792	3	All	9691	0.0020284	0.389512
I	3069801	STR_1802	0	All	9691	0.964078	0.0699123
I	3069801	STR_1802	2	All	9691	0.00194175	0.0699123
I	3069801	STR_1802	1	All	9691	0.00582524	0.0699123
I	3069801	STR_1802	4	All	9691	0.0038835	0.0699123
I	3069801	STR_1802	3	All	9691	0.0242718	0.0699123
I	3071382	STR_1804	0	All	9691	0.832692	0.283935
I	3071382	STR_1804	4	All	9691	0.15	0.283935
I	3071382	STR_1804	3	All	9691	0.00192308	0.283935
I	3071382	STR_1804	1	All	9691	0.00192308	0.283935
I	3071382	STR_1804	2	All	9691	0.0134615	0.283935
I	3073045	STR_1806	0	All	9691	0.99812	0.00375233
I	3073045	STR_1806	1	All	9691	0.0018797	0.00375233
I	3075008	STR_1809	0	All	9691	0.973425	0.0521905
I	3075008	STR_1809	4	All	9691	0.00393701	0.0521905
I	3075008	STR_1809	2	All	9691	0.011811	0.0521905
I	3075008	STR_1809	1	All	9691	0.00984252	0.0521905
I	3075075	STR_1810	0	All	9691	0.962818	0.0717369
I	3075075	STR_1810	2	All	9691	0.035225	0.0717369
I	3075075	STR_1810	1	All	9691	0.00195695	0.0717369
I	3075192	STR_1811	0	All	9691	0.909263	0.165666
I	3075192	STR_1811	1	All	9691	0.0869565	0.165666
I	3075192	STR_1811	2	All	9691	0.00378072	0.165666
I	3075288	STR_1812	0	All	9691	0.855131	0.25892
I	3075288	STR_1812	6	All	9691	0.0955734	0.25892
I	3075288	STR_1812	4	All	9691	0.0201207	0.25892
I	3075288	STR_1812	3	All	9691	0.00201207	0.25892
I	3075288	STR_1812	5	All	9691	0.0130785	0.25892
I	3075288	STR_1812	1	All	9691	0.00402414	0.25892
I	3075288	STR_1812	2	All	9691	0.0100604	0.25892
I	3076863	STR_1816	0	All	9691	0.96673	0.0643261
I	3076863	STR_1816	1	All	9691	0.03327	0.0643261
I	3100808	STR_1835	0	All	9691	0.980732	0.0379119
I	3100808	STR_1835	2	All	9691	0.00385356	0.0379119
I	3100808	STR_1835	1	All	9691	0.0154143	0.0379119
I	3123681	STR_1845	0	All	9691	0.891837	0.19903
I	3123681	STR_1845	1	All	9691	0.0214286	0.19903
I	3123681	STR_1845	2	All	9691	0.0704082	0.19903
I	3123681	STR_1845	3	All	9691	0.0132653	0.19903
I	3123681	STR_1845	5	All	9691	0.00204082	0.19903
I	3128168	STR_1850	0	All	9691	0.932879	0.127434
I	3128168	STR_1850	4	All	9691	0.0194553	0.127434
I	3128168	STR_1850	1	All	9691	0.00194553	0.127434
I	3128168	STR_1850	2	All	9691	0.0437743	0.127434
I	3128168	STR_1850	3	All	9691	0.00194553	0.127434
I	3140577	STR_1857	0	All	9691	0.78932	0.345286
I	3140577	STR_1857	4	All	9691	0.0194175	0.345286
I	3140577	STR_1857	1	All	9691	0.176699	0.345286
I	3140577	STR_1857	2	All	9691	0.00776699	0.345286
I	3140577	STR_1857	5	All	9691	0.00485437	0.345286
I	3140577	STR_1857	3	All	9691	0.00194175	0.345286
I	3140678	STR_1858	0	All	9691	0.976054	0.0471129
I	3140678	STR_1858	3	All	9691	0.00957854	0.0471129
I	3140678	STR_1858	1	All	9691	0.00478927	0.0471129
I	3140678	STR_1858	2	All	9691	0.00957854	0.0471129
I	3206512	STR_1884	0	All	9691	0.963878	0.070494
I	3206512	STR_1884	5	All	9691	0.00380228	0.070494
I	3206512	STR_1884	3	All	9691	0.0190114	0.070494
I	3206512	STR_1884	4	All	9691	0.00760456	0.070494
I	3206512	STR_1884	1	All	9691	0.00190114	0.070494
I	3206512	STR_1884	2	All	9691	0.00190114	0.070494
I	3206512	STR_1884	6	All	9691	0.00190114	0.070494
I	3227846	STR_1888	0	All	9691	0.995164	0.00962441
I	3227846	STR_1888	1	All	9691	0.00483559	0.00962441
I	3233360	STR_1896	0	All	9691	0.632438	0.476411
I	3233360	STR_1896	3	All	9691	0.351248	0.476411
I	3233360	STR_1896	1	All	9691	0.0153551	0.476411
I	3246474	STR_1901	0	All	9691	0.98972	0.0203494
I	3246474	STR_1901	1	All	9691	0.0102804	0.0203494
I	3246589	STR_1902	0	All	9691	0.717694	0.40744
I	3246589	STR_1902	2	All	9691	0.27833	0.40744
I	3246589	STR_1902	1	All	9691	0.00198807	0.40744
I	3246589	STR_1902	3	All	9691	0.00198807	0.40744
I	3247472	STR_1903	0	All	9691	0.998124	0.00374531
I	3247472	STR_1903	1	All	9691	0.00187617	0.00374531
I	3249005	STR_1906	0	All	9691	0.907787	0.171226
I	3249005	STR_1906	1	All	9691	0.0655738	0.171226
I	3249005	STR_1906	5	All	9691	0.0194672	0.171226
I	3249005	STR_1906	4	All	9691	0.00204918	0.171226
I	3249005	STR_1906	3	All	9691	0.00307377	0.171226
I	3249005	STR_1906	2	All	9691	0.00204918	0.171226
I	3250712	STR_1908	0	All	9691	0.998039	0.00391388
I	3250712	STR_1908	1	All	9691	0.00196078	0.00391388
I	3250815	STR_1909	0	All	9691	0.628083	0.469983
I	3250815	STR_1909	2	All	9691	0.368121	0.469983
I	3250815	STR_1909	1	All	9691	0.00379507	0.469983
I	3259883	STR_1913	0	All	9691	0.982726	0.0341363
I	3259883	STR_1913	1	All	9691	0.00959693	0.0341363
I	3259883	STR_1913	4	All	9691	0.00191939	0.0341363
I	3259883	STR_1913	3	All	9691	0.00191939	0.0341363
I	3259883	STR_1913	2	All	9691	0.00383877	0.0341363
I	3268735	STR_1917	0	All	9691	0.994424	0.0110902
I	3268735	STR_1917	1	All	9691	0.00557621	0.0110902
I	3279407	STR_1923	0	All	9691	0.999023	0.00195122
I	3280637	STR_1926	0	All	9691	0.884615	0.204142
I	3280637	STR_1926	1	All	9691	0.115385	0.204142
I	3281898	STR_1928	0	All	9691	0.636905	0.521684
I	3281898	STR_1928	2	All	9691	0.105159	0.521684
I	3281898	STR_1928	3	All	9691	0.248016	0.521684
I	3281898	STR_1928	1	All	9691	0.00992063	0.521684
I	3297340	STR_1931	0	All	9691	0.765049	0.397498
I	3297340	STR_1931	3	All	9691	0.0631068	0.397498
I	3297340	STR_1931	4	All	9691	0.102913	0.397498
I	3297340	STR_1931	1	All	9691	0.0213592	0.397498
I	3297340	STR_1931	2	All	9691	0.0466019	0.397498
I	3305123	STR_1933	0	All	9691	0.964775	0.0683132
I	3305123	STR_1933	1	All	9691	0.0293542	0.0683132
I	3305123	STR_1933	2	All	9691	0.00587084	0.0683132
I	3316822	STR_1939	0	All	9691	0.917614	0.153224
I	3316822	STR_1939	3	All	9691	0.0681818	0.153224
I	3316822	STR_1939	2	All	9691	0.0094697	0.153224
I	3316822	STR_1939	1	All	9691	0.00473485	0.153224
I	3318901	STR_1940	0	All	9691	0.998073	0.00384614
I	3318901	STR_1940	1	All	9691	0.00192678	0.00384614
I	3332667	STR_1949	0	All	9691	0.597303	0.50359
I	3332667	STR_1949	2	All	9691	0.372832	0.50359
I	3332667	STR_1949	1	All	9691	0.00192678	0.50359
I	3332667	STR_1949	4	All	9691	0.00192678	0.50359
I	3332667	STR_1949	3	All	9691	0.0250482	0.50359
I	3332782	STR_1950	0	All	9691	0.961924	0.0736543
I	3332782	STR_1950	2	All	9691	0.0320641	0.0736543
I	3332782	STR_1950	1	All	9691	0.00200401	0.0736543
I	3332782	STR_1950	3	All	9691	0.00400802	0.0736543
I	3333030	STR_1952	0	All	9691	0.544291	0.562595
I	3333030	STR_1952	3	All	9691	0.369094	0.562595
I	3333030	STR_1952	4	All	9691	0.0688976	0.562595
I	3333030	STR_1952	2	All	9691	0.011811	0.562595
I	3333030	STR_1952	1	All	9691	0.00590551	0.562595
I	3334778	STR_1953	0	All	9691	0.994106	0.0117183
I	3334778	STR_1953	1	All	9691	0.00589391	0.0117183
I	3336318	STR_1955	0	All	9691	0.976048	0.0469161
I	3336318	STR_1955	2	All	9691	0.0199601	0.0469161
I	3336318	STR_1955	1	All	9691	0.00399202	0.0469161
I	3346343	STR_1957	0	All	9691	0.850913	0.265381
I	3346343	STR_1957	3	All	9691	0.0446247	0.265381
I	3346343	STR_1957	2	All	9691	0.0922921	0.265381
I	3346343	STR_1957	1	All	9691	0.00608519	0.265381
I	3346343	STR_1957	5	All	9691	0.0020284	0.265381
I	3346343	STR_1957	4	All	9691	0.0040568	0.265381
I	3351512	STR_1958	0	All	9691	0.65239	0.514347
I	3351512	STR_1958	1	All	9691	0.160359	0.514347
I	3351512	STR_1958	3	All	9691	0.185259	0.514347
I	3351512	STR_1958	2	All	9691	0.00199203	0.514347
I	3351698	STR_1959	0	All	9691	0.963783	0.0705177
I	3351698	STR_1959	3	All	9691	0.00704225	0.0705177
I	3351698	STR_1959	4	All	9691	0.0231388	0.0705177
I	3351698	STR_1959	1	All	9691	0.00402414	0.0705177
I	3351698	STR_1959	2	All	9691	0.00201207	0.0705177
I	3374844	STR_1965	0	All	9691	0.962598	0.0728211
I	3374844	STR_1965	1	All	9691	0.0187008	0.0728211
I	3374844	STR_1965	2	All	9691	0.0147638	0.0728211
I	3374844	STR_1965	3	All	9691	0.00393701	0.0728211
I	3374955	STR_1966	0	All	9691	0.990602	0.0186203
I	3374955	STR_1966	1	All	9691	0.0093985	0.0186203
I	3376565	STR_1967	0	All	9691	0.925234	0.138353
I	3376565	STR_1967	1	All	9691	0.0747664	0.138353
I	3386626	STR_1974	0	All	9691	0.998008	0.00397613
I	3386626	STR_1974	1	All	9691	0.00199203	0.00397613
I	3386666	STR_1975	0	All	9691	0.94466	0.105995
I	3386666	STR_1975	5	All	9691	0.038835	0.105995
I	3386666	STR_1975	3	All	9691	0.00970874	0.105995
I	3386666	STR_1975	1	All	9691	0.00194175	0.105995
I	3386666	STR_1975	4	All	9691	0.0038835	0.105995
I	3397345	STR_1977	0	All	9691	0.6423	0.475746
I	3397345	STR_1977	1	All	9691	0.333333	0.475746
I	3397345	STR_1977	2	All	9691	0.0243665	0.475746
I	3401857	STR_1981	0	All	9691	0.998081	0.0038314
I	3401857	STR_1981	1	All	9691	0.00191939	0.0038314
I	3425914	STR_1991	0	All	9691	0.994275	0.0113848
I	3425914	STR_1991	1	All	9691	0.00572519	0.0113848
I	3426811	STR_1992	0	All	9691	0.933735	0.125562
I	3426811	STR_1992	2	All	9691	0.0502008	0.125562
I	3426811	STR_1992	3	All	9691	0.00401606	0.125562
I	3426811	STR_1992	1	All	9691	0.00200803	0.125562
I	3426811	STR_1992	6	All	9691	0.00401606	0.125562
I	3426811	STR_1992	4	All	9691	0.00401606	0.125562
I	3426811	STR_1992	5	All	9691	0.00200803	0.125562
I	3456992	STR_2000	0	All	9691	0.592402	0.551583
I	3456992	STR_2000	2	All	9691	0.299795	0.551583
I	3456992	STR_2000	3	All	9691	0.0841889	0.551583
I	3456992	STR_2000	1	All	9691	0.0225873	0.551583
I	3472762	STR_2011	0	All	9691	0.989583	0.0206845
I	3472762	STR_2011	1	All	9691	0.00473485	0.0206845
I	3472762	STR_2011	3	All	9691	0.00189394	0.0206845
I	3472762	STR_2011	2	All	9691	0.00378788	0.0206845
I	3476423	STR_2013	0	All	9691	0.96139	0.0752598
I	3476423	STR_2013	2	All	9691	0.00579151	0.0752598
I	3476423	STR_2013	4	All	9691	0.003861	0.0752598
I	3476423	STR_2013	1	All	9691	0.015444	0.0752598
I	3476423	STR_2013	3	All	9691	0.0135135	0.0752598
I	3480266	STR_2014	0	All	9691	0.794872	0.343831
I	3480266	STR_2014	1	All	9691	0.150888	0.343831
I	3480266	STR_2014	3	All	9691	0.0345168	0.343831
I	3480266	STR_2014	2	All	9691	0.0197239	0.343831
I	3502810	STR_2020	0	All	9691	0.840551	0.26805
I	3502810	STR_2020	1	All	9691	0.159449	0.26805
I	3508639	STR_2022	0	All	9691	0.854086	0.258658
I	3508639	STR_2022	1	All	9691	0.0223735	0.258658
I	3508639	STR_2022	2	All	9691	0.105058	0.258658
I	3508639	STR_2022	3	All	9691	0.0184825	0.258658
I	3514538	STR_2024	0	All	9691	0.797732	0.324213
I	3514538	STR_2024	1	All	9691	0.198488	0.324213
I	3514538	STR_2024	2	All	9691	0.00378072	0.324213
I	3527197	STR_2029	0	All	9691	0.745681	0.410515
I	3527197	STR_2029	1	All	9691	0.103647	0.410515
I	3527197	STR_2029	2	All	9691	0.150672	0.410515
I	3530946	STR_2031	0	All	9691	0.999051	0.00189573
I	3533886	STR_2032	0	All	9691	0.723124	0.412816
I	3533886	STR_2032	2	All	9691	0.252535	0.412816
I	3533886	STR_2032	3	All	9691	0.0223124	0.412816
I	3533886	STR_2032	1	All	9691	0.0020284	0.412816
I	3535639	STR_2034	0	All	9691	0.594595	0.482104
I	3535639	STR_2034	1	All	9691	0.405405	0.482104
I	3538958	STR_2035	0	All	9691	0.99211	0.0156935
I	3538958	STR_2035	3	All	9691	0.00197239	0.0156935
I	3538958	STR_2035	1	All	9691	0.00394477	0.0156935
I	3538958	STR_2035	2	All	9691	0.00197239	0.0156935
I	3551397	STR_2040	0	All	9691	0.573386	0.615224
I	3551397	STR_2040	6	All	9691	0.0342466	0.615224
I	3551397	STR_2040	4	All	9691	0.132094	0.615224
I	3551397	STR_2040	5	All	9691	0.188845	0.615224
I	3551397	STR_2040	2	All	9691	0.0303327	0.615224
I	3551397	STR_2040	9	All	9691	0.0273973	0.615224
I	3551397	STR_2040	3	All	9691	0.00195695	0.615224
I	3551397	STR_2040	7	All	9691	0.00587084	0.615224
I	3551397	STR_2040	8	All	9691	0.00195695	0.615224
I	3551397	STR_2040	1	All	9691	0.00195695	0.615224
I	3551397	STR_2040	10	All	9691	0.00195695	0.615224
I	3580420	STR_2059	0	All	9691	0.992551	0.0147866
I	3580420	STR_2059	1	All	9691	0.00744879	0.0147866
I	3580875	STR_2060	0	All	9691	0.990494	0.0188741
I	3580875	STR_2060	1	All	9691	0.00570342	0.0188741
I	3580875	STR_2060	2	All	9691	0.00380228	0.0188741
I	3582651	STR_2062	0	All	9691	0.994071	0.0117874
I	3582651	STR_2062	1	All	9691	0.00592885	0.0117874
I	3582674	STR_2063	0	All	9691	0.975	0.049082
I	3582674	STR_2063	3	All	9691	0.015	0.049082
I	3582674	STR_2063	2	All	9691	0.008	0.049082
I	3582674	STR_2063	1	All	9691	0.002	0.049082
I	3593558	STR_2074	0	All	9691	0.740246	0.440814
I	3593558	STR_2074	3	All	9691	0.0770021	0.440814
I	3593558	STR_2074	2	All	9691	0.036961	0.440814
I	3593558	STR_2074	4	All	9691	0.0246407	0.440814
I	3593558	STR_2074	7	All	9691	0.0143737	0.440814
I	3593558	STR_2074	6	All	9691	0.0431211	0.440814
I	3593558	STR_2074	8	All	9691	0.0287474	0.440814
I	3593558	STR_2074	5	All	9691	0.0184805	0.440814
I	3593558	STR_2074	9	All	9691	0.00616016	0.440814
I	3593558	STR_2074	11	All	9691	0.00616016	0.440814
I	3593558	STR_2074	10	All	9691	0.00205339	0.440814
I	3593558	STR_2074	1	All	9691	0.00205339	0.440814
I	3602113	STR_2082	0	All	9691	0.990512	0.0188457
I	3602113	STR_2082	1	All	9691	0.0056926	0.0188457
I	3602113	STR_2082	2	All	9691	0.00189753	0.0188457
I	3602113	STR_2082	3	All	9691	0.00189753	0.0188457
I	3620485	STR_2089	0	All	9691	0.975096	0.048568
I	3620485	STR_2089	1	All	9691	0.0249042	0.048568
I	3622189	STR_2091	0	All	9691	0.980769	0.0378402
I	3622189	STR_2091	1	All	9691	0.0153846	0.0378402
I	3622189	STR_2091	2	All	9691	0.00384615	0.0378402
I	3627770	STR_2098	0	All	9691	0.866472	0.239795
I	3627770	STR_2098	1	All	9691	0.0506823	0.239795
I	3627770	STR_2098	2	All	9691	0.082846	0.239795
I	3628049	STR_2099	0	All	9691	0.996269	0.0074418
I	3628049	STR_2099	1	All	9691	0.00186567	0.0074418
I	3628049	STR_2099	2	All	9691	0.00186567	0.0074418
I	3647992	STR_2105	0	All	9691	0.928429	0.134586
I	3647992	STR_2105	1	All	9691	0.05666	0.134586
I	3647992	STR_2105	2	All	9691	0.0149105	0.134586
I	3650676	STR_2109	0	All	9691	0.913534	0.158601
I	3650676	STR_2109	1	All	9691	0.0827068	0.158601
I	3650676	STR_2109	2	All	9691	0.0037594	0.158601
I	3654288	STR_2110	0	All	9691	0.998054	0.00388537
I	3660404	STR_2114	0	All	9691	0.90619	0.174409
I	3660404	STR_2114	1	All	9691	0.049323	0.174409
I	3660404	STR_2114	2	All	9691	0.0444874	0.174409
I	3675288	STR_2116	0	All	9691	0.980658	0.038116
I	3675288	STR_2116	1	All	9691	0.00773694	0.038116
I	3675288	STR_2116	2	All	9691	0.0116054	0.038116
I	3676140	STR_2118	0	All	9691	0.998073	0.00384614
I	3676140	STR_2118	1	All	9691	0.00192678	0.00384614
I	3683201	STR_2120	0	All	9691	0.996183	0.00760445
I	3683201	STR_2120	1	All	9691	0.00381679	0.00760445
I	3710199	STR_2127	0	All	9691	0.825203	0.295259
I	3710199	STR_2127	3	All	9691	0.153455	0.295259
I	3710199	STR_2127	1	All	9691	0.0142276	0.295259
I	3710199	STR_2127	4	All	9691	0.0050813	0.295259
I	3710199	STR_2127	2	All	9691	0.00203252	0.295259
I	3713299	STR_2129	0	All	9691	0.904713	0.173351
I	3713299	STR_2129	2	All	9691	0.0901639	0.173351
I	3713299	STR_2129	3	All	9691	0.00204918	0.173351
I	3713299	STR_2129	1	All	9691	0.00307377	0.173351
I	3713593	STR_2131	0	All	9691	0.998117	0.00375939
I	3713593	STR_2131	1	All	9691	0.00188324	0.00375939
I	3721733	STR_2132	0	All	9691	0.79023	0.331533
I	3721733	STR_2132	1	All	9691	0.20977	0.331533
I	3722548	STR_2134	0	All	9691	0.604839	0.535382
I	3722548	STR_2134	3	All	9691	0.303427	0.535382
I	3722548	STR_2134	2	All	9691	0.0816532	0.535382
I	3722548	STR_2134	1	All	9691	0.00403226	0.535382
I	3722548	STR_2134	4	All	9691	0.00604839	0.535382
I	3724843	STR_2137	0	All	9691	0.99384	0.0122444
I	3724843	STR_2137	1	All	9691	0.00616016	0.0122444
I	3726277	STR_2139	0	All	9691	0.988764	0.0222755
I	3726277	STR_2139	1	All	9691	0.00374532	0.0222755
I	3726277	STR_2139	2	All	9691	0.00749064	0.0222755
I	3733558	STR_2141	0	All	9691	0.98249	0.0344063
I	3733558	STR_2141	1	All	9691	0.0175097	0.0344063
I	3735600	STR_2142	0	All	9691	0.996248	0.00747653
I	3735600	STR_2142	1	All	9691	0.00375235	0.00747653
I	3738534	STR_2144	0	All	9691	0.992481	0.0149599
I	3738534	STR_2144	3	All	9691	0.0037594	0.0149599
I	3738534	STR_2144	1	All	9691	0.0018797	0.0149599
I	3738534	STR_2144	2	All	9691	0.0018797	0.0149599
I	3740528	STR_2145	0	All	9691	0.925049	0.139234
I	3740528	STR_2145	3	All	9691	0.0710059	0.139234
I	3740528	STR_2145	1	All	9691	0.00197239	0.139234
I	3740528	STR_2145	2	All	9691	0.00197239	0.139234
I	3748005	STR_2147	0	All	9691	0.998077	0.00383876
I	3748005	STR_2147	1	All	9691	0.00192308	0.00383876
I	3755875	STR_2149	0	All	9691	0.998117	0.00375939
I	3755875	STR_2149	1	All	9691	0.00188324	0.00375939
I	3775099	STR_2154	0	All	9691	0.998077	0.00383876
I	3775099	STR_2154	1	All	9691	0.00192308	0.00383876
I	3808511	STR_2162	0	All	9691	0.910577	0.16319
I	3808511	STR_2162	1	All	9691	0.0875	0.16319
I	3808511	STR_2162	2	All	9691	0.00192308	0.16319
I	3817041	STR_2163	0	All	9691	0.971537	0.0557522
I	3817041	STR_2163	1	All	9691	0.0151803	0.0557522
I	3817041	STR_2163	3	All	9691	0.0113852	0.0557522
I	3817041	STR_2163	2	All	9691	0.00189753	0.0557522
I	3820867	STR_2164	0	All	9691	0.998077	0.00383876
I	3820867	STR_2164	1	All	9691	0.00192308	0.00383876
I	3822488	STR_2166	0	All	9691	0.935361	0.120921
I	3822488	STR_2166	1	All	9691	0.0646388	0.120921
I	3822744	STR_2167	0	All	9691	0.996226	0.00751869
I	3822744	STR_2167	1	All	9691	0.00377358	0.00751869
I	3822826	STR_2169	0	All	9691	0.930041	0.130129
I	3822826	STR_2169	1	All	9691	0.0699588	0.130129
I	3823728	STR_2171	0	All	9691	0.913793	0.158903
I	3823728	STR_2171	2	All	9691	0.0775862	0.158903
I	3823728	STR_2171	1	All	9691	0.00766284	0.158903
I	3824290	STR_2173	0	All	9691	0.988258	0.0232076
I	3824290	STR_2173	1	All	9691	0.0117417	0.0232076
I	3824513	STR_2175	0	All	9691	0.97451	0.0497732
I	3824513	STR_2175	2	All	9691	0.0235294	0.0497732
I	3824513	STR_2175	1	All	9691	0.00196078	0.0497732
I	3824833	STR_2176	0	All	9691	0.983779	0.0320804
I	3824833	STR_2176	2	All	9691	0.00763359	0.0320804
I	3824833	STR_2176	3	All	9691	0.00572519	0.0320804
I	3824833	STR_2176	1	All	9691	0.0028626	0.0320804
I	3827503	STR_2178	0	All	9691	0.996154	0.00767012
I	3827503	STR_2178	1	All	9691	0.00192308	0.00767012
I	3827503	STR_2178	2	All	9691	0.00192308	0.00767012
I	3831083	STR_2179	0	All	9691	0.998141	0.00371056
I	3831083	STR_2179	1	All	9691	0.00185874	0.00371056
I	3834066	STR_2181	0	All	9691	0.994197	0.011553
I	3834066	STR_2181	2	All	9691	0.00386847	0.011553
I	3834066	STR_2181	1	All	9691	0.00193424	0.011553
I	3853538	STR_2186	0	All	9691	0.877953	0.222216
I	3853538	STR_2186	3	All	9691	0.0767717	0.222216
I	3853538	STR_2186	2	All	9691	0.00590551	0.222216
I	3853538	STR_2186	1	All	9691	0.0314961	0.222216
I	3853538	STR_2186	4	All	9691	0.00787402	0.222216
I	3858169	STR_2191	0	All	9691	0.767276	0.389982
I	3858169	STR_2191	1	All	9691	0.0884146	0.389982
I	3858169	STR_2191	5	All	9691	0.0223577	0.389982
I	3858169	STR_2191	3	All	9691	0.113821	0.389982
I	3858169	STR_2191	4	All	9691	0.00406504	0.389982
I	3858169	STR_2191	2	All	9691	0.00406504	0.389982
I	3858277	STR_2192	0	All	9691	0.998124	0.00374531
I	3858277	STR_2192	1	All	9691	0.00187617	0.00374531
I	3862663	STR_2194	0	All	9691	0.967583	0.0629629
I	3862663	STR_2194	1	All	9691	0.0284872	0.0629629
I	3862663	STR_2194	3	All	9691	0.00196464	0.0629629
I	3862663	STR_2194	2	All	9691	0.00196464	0.0629629
I	3878542	STR_2196	0	All	9691	0.744253	0.386296
I	3878542	STR_2196	2	All	9691	0.244253	0.386296
I	3878542	STR_2196	1	All	9691	0.0114943	0.386296
I	3897431	STR_2199	0	All	9691	0.998134	0.00372438
I	3897431	STR_2199	1	All	9691	0.00186567	0.00372438
I	3911889	STR_2200	0	All	9691	0.815637	0.318855
I	3911889	STR_2200	3	All	9691	0.003861	0.318855
I	3911889	STR_2200	2	All	9691	0.102317	0.318855
I	3911889	STR_2200	4	All	9691	0.0733591	0.318855
I	3911889	STR_2200	5	All	9691	0.003861	0.318855
I	3914289	STR_2202	0	All	9691	0.964912	0.0678423
I	3914289	STR_2202	2	All	9691	0.0331384	0.0678423
I	3914289	STR_2202	1	All	9691	0.00194932	0.0678423
I	3915876	STR_2203	0	All	9691	0.996226	0.00751869
I	3915876	STR_2203	1	All	9691	0.00377358	0.00751869
I	3918205	STR_2205	0	All	9691	0.817289	0.320072
I	3918205	STR_2205	2	All	9691	0.0776031	0.320072
I	3918205	STR_2205	3	All	9691	0.0736739	0.320072
I	3918205	STR_2205	1	All	9691	0.021611	0.320072
I	3918205	STR_2205	4	All	9691	0.00589391	0.320072
I	3918205	STR_2205	5	All	9691	0.00392927	0.320072
I	3952578	STR_2211	0	All	9691	0.90381	0.173876
I	3952578	STR_2211	1	All	9691	0.0961905	0.173876
I	3955157	STR_2214	0	All	9691	0.808383	0.310933
I	3955157	STR_2214	1	All	9691	0.00199601	0.310933
I	3955157	STR_2214	2	All	9691	0.188623	0.310933
I	3977347	STR_2219	0	All	9691	0.918406	0.149873
I	3977347	STR_2219	1	All	9691	0.0815939	0.149873
I	3995280	STR_2221	0	All	9691	0.998117	0.00375939
I	3995280	STR_2221	1	All	9691	0.00188324	0.00375939
I	4004968	STR_2228	0	All	9691	0.820641	0.299435
I	4004968	STR_2228	4	All	9691	0.164329	0.299435
I	4004968	STR_2228	5	All	9691	0.00200401	0.299435
I	4004968	STR_2228	2	All	9691	0.00200401	0.299435
I	4004968	STR_2228	3	All	9691	0.01002	0.299435
I	4005511	STR_2229	0	All	9691	0.905894	0.173165
I	4005511	STR_2229	1	All	9691	0.00760456	0.173165
I	4005511	STR_2229	2	All	9691	0.0779468	0.173165
I	4005511	STR_2229	3	All	9691	0.00760456	0.173165
I	4005562	STR_2230	0	All	9691	0.812144	0.310375
I	4005562	STR_2230	2	All	9691	0.172676	0.310375
I	4005562	STR_2230	1	All	9691	0.0151803	0.310375
I	4005777	STR_2231	0	All	9691	0.990079	0.0197015
I	4005777	STR_2231	4	All	9691	0.00595238	0.0197015
I	4005777	STR_2231	3	All	9691	0.00198413	0.0197015
I	4006485	STR_2233	0	All	9691	0.835564	0.276022
I	4006485	STR_2233	1	All	9691	0.160612	0.276022
I	4006485	STR_2233	2	All	9691	0.00382409	0.276022
I	4006714	STR_2234	0	All	9691	0.824811	0.290295
I	4006714	STR_2234	1	All	9691	0.171402	0.290295
I	4006714	STR_2234	2	All	9691	0.00378788	0.290295
I	4008346	STR_2235	0	All	9691	0.987782	0.0241375
I	4008346	STR_2235	1	All	9691	0.012218	0.0241375
I	4012395	STR_2239	0	All	9691	0.992467	0.0149524
I	4012395	STR_2239	1	All	9691	0.00753296	0.0149524
I	4018069	STR_2242	0	All	9691	0.818	0.315928
I	4018069	STR_2242	3	All	9691	0.078	0.315928
I	4018069	STR_2242	4	All	9691	0.094	0.315928
I	4018069	STR_2242	5	All	9691	0.002	0.315928
I	4018069	STR_2242	6	All	9691	0.002	0.315928
I	4018069	STR_2242	1	All	9691	0.004	0.315928
I	4018069	STR_2242	2	All	9691	0.002	0.315928
I	4019631	STR_2244	0	All	9691	0.810139	0.313963
I	4019631	STR_2244	4	All	9691	0.171968	0.313963
I	4019631	STR_2244	2	All	9691	0.00596421	0.313963
I	4019631	STR_2244	1	All	9691	0.00198807	0.313963
I	4019631	STR_2244	3	All	9691	0.00994036	0.313963
I	4019826	STR_2245	0	All	9691	0.994318	0.0113134
I	4019826	STR_2245	2	All	9691	0.00378788	0.0113134
I	4019826	STR_2245	1	All	9691	0.00189394	0.0113134
I	4020633	STR_2247	0	All	9691	0.61194	0.474939
I	4020633	STR_2247	1	All	9691	0.38806	0.474939
I	4030472	STR_2251	0	All	9691	0.998051	0.00389104
I	4030472	STR_2251	1	All	9691	0.00194932	0.00389104
I	4073170	STR_2256	0	All	9691	0.709486	0.447312
I	4073170	STR_2256	3	All	9691	0.20751	0.447312
I	4073170	STR_2256	1	All	9691	0.0790514	0.447312
I	4073170	STR_2256	4	All	9691	0.00197628	0.447312
I	4073170	STR_2256	2	All	9691	0.00197628	0.447312
I	4097649	STR_2262	0	All	9691	0.996212	0.00754706
I	4097649	STR_2262	1	All	9691	0.00378788	0.00754706
I	4099347	STR_2263	0	All	9691	0.926782	0.135989
I	4099347	STR_2263	2	All	9691	0.0712909	0.135989
I	4099347	STR_2263	1	All	9691	0.00192678	0.135989
I	4103275	STR_2266	0	All	9691	0.923077	0.142012
I	4103275	STR_2266	1	All	9691	0.0769231	0.142012
I	4108512	STR_2267	0	All	9691	0.996161	0.00764807
I	4108512	STR_2267	1	All	9691	0.00383877	0.00764807
I	4123972	STR_2270	0	All	9691	0.997988	0.00401605
I	4123972	STR_2270	1	All	9691	0.00201207	0.00401605
I	4124624	STR_2271	0	All	9691	0.628937	0.548323
I	4124624	STR_2271	1	All	9691	0.208661	0.548323
I	4124624	STR_2271	4	All	9691	0.0816929	0.548323
I	4124624	STR_2271	3	All	9691	0.0767717	0.548323
I	4124624	STR_2271	5	All	9691	0.0019685	0.548323
I	4124624	STR_2271	2	All	9691	0.0019685	0.548323
I	4131060	STR_2274	0	All	9691	0.998113	0.00376646
I	4131060	STR_2274	1	All	9691	0.00188679	0.00376646
I	4139985	STR_2275	0	All	9691	0.989382	0.0210622
I	4139985	STR_2275	1	All	9691	0.00675676	0.0210622
I	4139985	STR_2275	2	All	9691	0.003861	0.0210622
I	4143876	STR_2277	0	All	9691	0.984906	0.0297828
I	4143876	STR_2277	1	All	9691	0.00188679	0.0297828
I	4143876	STR_2277	2	All	9691	0.0132075	0.0297828
I	4148991	STR_2279	0	All	9691	0.999037	0.00192493
I	4150490	STR_2280	0	All	9691	0.996212	0.00755424
I	4150490	STR_2280	2	All	9691	0.00189394	0.00755424
I	4150490	STR_2280	1	All	9691	0.00189394	0.00755424
I	4150640	STR_2281	0	All	9691	0.99812	0.00375233
I	4150640	STR_2281	1	All	9691	0.0018797	0.00375233
I	4157813	STR_2283	0	All	9691	0.99619	0.00759546
I	4157813	STR_2283	2	All	9691	0.00285714	0.00759546
I	4159697	STR_2284	0	All	9691	0.640974	0.5282
I	4159697	STR_2284	8	All	9691	0.237323	0.5282
I	4159697	STR_2284	2	All	9691	0.0628803	0.5282
I	4159697	STR_2284	10	All	9691	0.015213	0.5282
I	4159697	STR_2284	6	All	9691	0.0030426	0.5282
I	4159697	STR_2284	4	All	9691	0.0182556	0.5282
I	4159697	STR_2284	3	All	9691	0.00608519	0.5282
I	4159697	STR_2284	5	All	9691	0.0040568	0.5282
I	4159697	STR_2284	7	All	9691	0.0020284	0.5282
I	4159697	STR_2284	9	All	9691	0.0020284	0.5282
I	4159697	STR_2284	1	All	9691	0.00608519	0.5282
I	4162248	STR_2287	0	All	9691	0.834615	0.281361
I	4162248	STR_2287	3	All	9691	0.148077	0.281361
I	4162248	STR_2287	1	All	9691	0.00961538	0.281361
I	4162248	STR_2287	2	All	9691	0.00576923	0.281361
I	4162248	STR_2287	4	All	9691	0.00192308	0.281361
I	4164773	STR_2289	0	All	9691	0.951402	0.0924727
I	4164773	STR_2289	1	All	9691	0.0485981	0.0924727
I	4172512	STR_2290	0	All	9691	0.732353	0.393066
I	4172512	STR_2290	2	All	9691	0.265686	0.393066
I	4172512	STR_2290	1	All	9691	0.00196078	0.393066
I	4200139	STR_2296	0	All	9691	0.998138	0.00371746
I	4200139	STR_2296	1	All	9691	0.0018622	0.00371746
I	4202470	STR_2299	0	All	9691	0.998092	0.00380951
I	4202470	STR_2299	1	All	9691	0.0019084	0.00380951
I	4207598	STR_2300	0	All	9691	0.968566	0.0612646
I	4207598	STR_2300	3	All	9691	0.024558	0.0612646
I	4207598	STR_2300	2	All	9691	0.00196464	0.0612646
I	4207598	STR_2300	5	All	9691	0.00196464	0.0612646
I	4207598	STR_2300	1	All	9691	0.000982318	0.0612646
I	4209436	STR_2301	0	All	9691	0.725743	0.400222
I	4209436	STR_2301	2	All	9691	0.270297	0.400222
I	4209436	STR_2301	1	All	9691	0.0039604	0.400222
I	4218480	STR_2303	0	All	9691	0.939689	0.113794
I	4218480	STR_2303	3	All	9691	0.0564202	0.113794
I	4218480	STR_2303	1	All	9691	0.00194553	0.113794
I	4218480	STR_2303	2	All	9691	0.00194553	0.113794
I	4230886	STR_2307	0	All	9691	0.998131	0.00373133
I	4230886	STR_2307	1	All	9691	0.00186916	0.00373133
I	4234617	STR_2309	0	All	9691	0.992248	0.0154062
I	4234617	STR_2309	2	All	9691	0.00581395	0.0154062
I	4234617	STR_2309	1	All	9691	0.00193798	0.0154062
I	4251217	STR_2313	0	All	9691	0.670757	0.448252
I	4251217	STR_2313	3	All	9691	0.319018	0.448252
I	4251217	STR_2313	1	All	9691	0.00715746	0.448252
I	4251217	STR_2313	2	All	9691	0.00306748	0.448252
I	4258743	STR_2316	0	All	9691	0.995256	0.00944986
I	4258743	STR_2316	1	All	9691	0.00379507	0.00944986
I	4261699	STR_2320	0	All	9691	0.626506	0.550761
I	4261699	STR_2320	6	All	9691	0.218876	0.550761
I	4261699	STR_2320	5	All	9691	0.0552209	0.550761
I	4261699	STR_2320	4	All	9691	0.0753012	0.550761
I	4261699	STR_2320	3	All	9691	0.00301205	0.550761
I	4261699	STR_2320	10	All	9691	0.00401606	0.550761
I	4261699	STR_2320	8	All	9691	0.00702811	0.550761
I	4261699	STR_2320	1	All	9691	0.00200803	0.550761
I	4261699	STR_2320	2	All	9691	0.00200803	0.550761
I	4261699	STR_2320	7	All	9691	0.00200803	0.550761
I	4261699	STR_2320	9	All	9691	0.00401606	0.550761
I	4303912	STR_2329	0	All	9691	0.820236	0.295599
I	4303912	STR_2329	1	All	9691	0.1778	0.295599
I	4313827	STR_2331	0	All	9691	0.957786	0.0811524
I	4313827	STR_2331	1	All	9691	0.0384615	0.0811524
I	4313827	STR_2331	2	All	9691	0.00375235	0.0811524
I	4326724	STR_2333	0	All	9691	0.990946	0.0180054
I	4326724	STR_2333	2	All	9691	0.00201207	0.0180054
I	4326724	STR_2333	3	All	9691	0.00201207	0.0180054
I	4326724	STR_2333	1	All	9691	0.00201207	0.0180054
I	4370656	STR_2337	0	All	9691	0.996226	0.00751869
I	4370656	STR_2337	1	All	9691	0.00377358	0.00751869
I	4379820	STR_2340	0	All	9691	0.708098	0.413391
I	4379820	STR_2340	1	All	9691	0.291902	0.413391
I	4407985	STR_2342	0	All	9691	0.998008	0.00397613
I	4407985	STR_2342	1	All	9691	0.00199203	0.00397613
I	4420728	STR_2343	0	All	9691	0.817719	0.307334
I	4420728	STR_2343	3	All	9691	0.153768	0.307334
I	4420728	STR_2343	4	All	9691	0.01222	0.307334
I	4420728	STR_2343	1	All	9691	0.00203666	0.307334
I	4420728	STR_2343	2	All	9691	0.0142566	0.307334
I	4420936	STR_2344	0	All	9691	0.92381	0.140771
I	4420936	STR_2344	1	All	9691	0.0761905	0.140771
I	4422257	STR_2346	0	All	9691	0.976923	0.0451701
I	4422257	STR_2346	1	All	9691	0.00192308	0.0451701
I	4422257	STR_2346	2	All	9691	0.0211538	0.0451701
I	4422304	STR_2347	0	All	9691	0.999058	0.00188147
I	4422815	STR_2348	0	All	9691	0.974719	0.0492836
I	4422815	STR_2348	1	All	9691	0.0252809	0.0492836
I	4430945	STR_2351	0	All	9691	0.851607	0.253846
I	4430945	STR_2351	2	All	9691	0.144612	0.253846
I	4430945	STR_2351	1	All	9691	0.00189036	0.253846
I	4430945	STR_2351	3	All	9691	0.00189036	0.253846
I	4431969	STR_2352	0	All	9691	0.909867	0.166131
I	4431969	STR_2352	1	All	9691	0.0768501	0.166131
I	4431969	STR_2352	3	All	9691	0.00948767	0.166131
I	4431969	STR_2352	2	All	9691	0.00379507	0.166131
I	4435047	STR_2355	0	All	9691	0.955912	0.0842888
I	4435047	STR_2355	1	All	9691	0.0440882	0.0842888
I	4436730	STR_2359	0	All	9691	0.944444	0.104938
I	4436730	STR_2359	1	All	9691	0.0555556	0.104938
I	4440338	STR_2361	0	All	9691	0.994318	0.0112991
I	4440338	STR_2361	1	All	9691	0.00568182	0.0112991
I	4441769	STR_2363	0	All	9691	0.848126	0.261987
I	4441769	STR_2363	3	All	9691	0.00295858	0.261987
I	4441769	STR_2363	2	All	9691	0.136095	0.261987
I	4441769	STR_2363	1	All	9691	0.0128205	0.261987
I	4450140	STR_2364	0	All	9691	0.927203	0.135267
I	4450140	STR_2364	1	All	9691	0.00191571	0.135267
I	4450140	STR_2364	2	All	9691	0.0708812	0.135267
I	4453722	STR_2368	0	All	9691	0.997047	0.00589195
I	4453722	STR_2368	1	All	9691	0.0019685	0.00589195
I	4475229	STR_2375	0	All	9691	0.918762	0.153938
I	4475229	STR_2375	7	All	9691	0.00580271	0.153938
I	4475229	STR_2375	6	All	9691	0.0348162	0.153938
I	4475229	STR_2375	4	All	9691	0.0251451	0.153938
I	4475229	STR_2375	2	All	9691	0.00386847	0.153938
I	4475229	STR_2375	3	All	9691	0.00580271	0.153938
I	4475229	STR_2375	5	All	9691	0.00193424	0.153938
I	4475229	STR_2375	1	All	9691	0.00193424	0.153938
I	4475229	STR_2375	8	All	9691	0.00193424	0.153938
I	4478748	STR_2378	0	All	9691	0.983235	0.0331201
I	4478748	STR_2378	2	All	9691	0.00197239	0.0331201
I	4478748	STR_2378	1	All	9691	0.0108481	0.0331201
I	4478748	STR_2378	3	All	9691	0.00197239	0.0331201
I	4479324	STR_2379	0	All	9691	0.995108	0.00973687
I	4479324	STR_2379	1	All	9691	0.00489237	0.00973687
I	4479962	STR_2380	0	All	9691	0.927451	0.137455
I	4479962	STR_2380	4	All	9691	0.0372549	0.137455
I	4479962	STR_2380	2	All	9691	0.0313725	0.137455
I	4479962	STR_2380	3	All	9691	0.00196078	0.137455
I	4479962	STR_2380	1	All	9691	0.00196078	0.137455
I	4487354	STR_2387	0	All	9691	0.998113	0.00376646
I	4487354	STR_2387	1	All	9691	0.00188679	0.00376646
I	4488230	STR_2388	0	All	9691	0.996964	0.00605853
I	4488230	STR_2388	2	All	9691	0.00202429	0.00605853
I	4488304	STR_2389	0	All	9691	0.967262	0.0637263
I	4488304	STR_2389	2	All	9691	0.0248016	0.0637263
I	4488304	STR_2389	1	All	9691	0.00793651	0.0637263
I	4490274	STR_2390	0	All	9691	0.998066	0.00386099
[truncated: 90,196 more rows]

## Sheet: SNVs
Chr	start	He	n_st	type
I	10000101	0.00558655	Swept	SNVs
I	10000236	0.0111417	Swept	SNVs
I	10000653	0.00558655	Swept	SNVs
I	10001677	0.00558655	Swept	SNVs
I	10002183	0.00558655	Swept	SNVs
I	10002327	0.0166655	Swept	SNVs
I	10002347	0.00558655	Swept	SNVs
I	10002737	0.0111417	Swept	SNVs
I	10003627	0.0544532	Swept	SNVs
I	10006782	0.0111417	Swept	SNVs
I	10007160	0.00558655	Swept	SNVs
I	10007812	0.0957559	Swept	SNVs
I	10009505	0.00558655	Swept	SNVs
I	10010095	0.00558655	Swept	SNVs
I	10010190	0.00558655	Swept	SNVs
I	10011147	0.00558655	Swept	SNVs
I	10012735	0.00558655	Swept	SNVs
I	10013172	0.0111417	Swept	SNVs
I	10013226	0.00558655	Swept	SNVs
I	10013929	0.00558655	Swept	SNVs
I	10014301	0.00558655	Swept	SNVs
I	10014390	0.0111417	Swept	SNVs
I	100149	0.00558655	Swept	SNVs
I	10015365	0.00558655	Swept	SNVs
I	10015389	0.00558655	Swept	SNVs
I	10015462	0.00558655	Swept	SNVs
I	10016571	0.0384468	Swept	SNVs
I	10016621	0.00558655	Swept	SNVs
I	10018525	0.00558655	Swept	SNVs
I	10019371	0.00558655	Swept	SNVs
I	10020314	0.0166655	Swept	SNVs
I	10020446	0.00558655	Swept	SNVs
I	10020499	0.00558655	Swept	SNVs
I	10020695	0.00558655	Swept	SNVs
I	10020982	0.00558655	Swept	SNVs
I	10023938	0.0111417	Swept	SNVs
I	10024062	0.0957559	Swept	SNVs
I	10030023	0.00558655	Swept	SNVs
I	10030056	0.00558655	Swept	SNVs
I	10031558	0.00558655	Swept	SNVs
I	10031603	0.00558655	Swept	SNVs
I	10032121	0.00558655	Swept	SNVs
I	10032542	0.00558655	Swept	SNVs
I	10032575	0.00558655	Swept	SNVs
I	10032886	0.00558655	Swept	SNVs
I	10033227	0.00558655	Swept	SNVs
I	10034984	0.00558655	Swept	SNVs
I	10035488	0.00558655	Swept	SNVs
I	10035807	0.00558655	Swept	SNVs
I	1003641	0.00558655	Swept	SNVs
I	1003648	0.260653	Swept	SNVs
I	10037498	0.00558655	Swept	SNVs
I	10038037	0.00558655	Swept	SNVs
I	10038596	0.00558655	Swept	SNVs
I	10038951	0.00558655	Swept	SNVs
I	10039060	0.00558655	Swept	SNVs
I	10039265	0.00558655	Swept	SNVs
I	10039275	0.0111417	Swept	SNVs
I	10039870	0.00558655	Swept	SNVs
I	10040194	0.00558655	Swept	SNVs
I	10040409	0.00558655	Swept	SNVs
I	10040820	0.00558655	Swept	SNVs
I	10041133	0.0111417	Swept	SNVs
I	10044588	0.00558655	Swept	SNVs
I	10044615	0.0330485	Swept	SNVs
I	10044621	0.00558655	Swept	SNVs
I	1004482	0.00558655	Swept	SNVs
I	10045502	0.00558655	Swept	SNVs
I	10045947	0.00558655	Swept	SNVs
I	10046403	0.0111417	Swept	SNVs
I	10047561	0.00558655	Swept	SNVs
I	1004793	0.00558655	Swept	SNVs
I	10048333	0.0544532	Swept	SNVs
I	10049909	0.00558655	Swept	SNVs
I	10050497	0.00558655	Swept	SNVs
I	10050761	0.00558655	Swept	SNVs
I	1005089	0.0438136	Swept	SNVs
I	10051363	0.00558655	Swept	SNVs
I	10052542	0.00558655	Swept	SNVs
I	10052694	0.00558655	Swept	SNVs
I	10052801	0.00558655	Swept	SNVs
I	10052806	0.00558655	Swept	SNVs
I	10053092	0.0166655	Swept	SNVs
I	10054404	0.00558655	Swept	SNVs
I	10054723	0.0111417	Swept	SNVs
I	10055020	0.00558655	Swept	SNVs
I	10057652	0.00558655	Swept	SNVs
I	10058462	0.0111417	Swept	SNVs
I	10058494	0.00558655	Swept	SNVs
I	10058572	0.00558655	Swept	SNVs
I	10058620	0.00558655	Swept	SNVs
I	10058979	0.00558655	Swept	SNVs
I	10059788	0.00558655	Swept	SNVs
I	10062114	0.00558655	Swept	SNVs
I	10063269	0.0111417	Swept	SNVs
I	1006347	0.0111417	Swept	SNVs
I	10063536	0.00558655	Swept	SNVs
I	10063567	0.0544532	Swept	SNVs
I	10065008	0.0221579	Swept	SNVs
I	10065158	0.0111417	Swept	SNVs
I	10065282	0.00558655	Swept	SNVs
I	10065302	0.00558655	Swept	SNVs
I	10065404	0.00558655	Swept	SNVs
I	10065718	0.0111417	Swept	SNVs
I	10066321	0.00558655	Swept	SNVs
I	10066621	0.00558655	Swept	SNVs
I	10066858	0.00558655	Swept	SNVs
I	10067140	0.00558655	Swept	SNVs
I	1006805	0.00558655	Swept	SNVs
I	10069124	0.00558655	Swept	SNVs
I	10069563	0.00558655	Swept	SNVs
I	1006973	0.0221579	Swept	SNVs
I	1006998	0.0166655	Swept	SNVs
I	10070180	0.00558655	Swept	SNVs
I	10070359	0.00558655	Swept	SNVs
I	10070988	0.0384468	Swept	SNVs
I	1007105	0.0276189	Swept	SNVs
I	10071508	0.00558655	Swept	SNVs
I	10071554	0.0221579	Swept	SNVs
I	1007182	0.00558655	Swept	SNVs
I	10072050	0.00558655	Swept	SNVs
I	10072146	0.00558655	Swept	SNVs
I	10073478	0.00558655	Swept	SNVs
I	10073813	0.00558655	Swept	SNVs
I	10074016	0.0221579	Swept	SNVs
I	10074295	0.00558655	Swept	SNVs
I	10074506	0.0166655	Swept	SNVs
I	10074852	0.00558655	Swept	SNVs
I	10075494	0.00558655	Swept	SNVs
I	10075523	0.0111417	Swept	SNVs
I	10078057	0.00558655	Swept	SNVs
I	10078267	0.00558655	Swept	SNVs
I	10079640	0.00558655	Swept	SNVs
I	10080236	0.0111417	Swept	SNVs
I	10080380	0.0276189	Swept	SNVs
I	10080597	0.00558655	Swept	SNVs
I	10080990	0.0166655	Swept	SNVs
I	10082232	0.00558655	Swept	SNVs
I	10082626	0.00558655	Swept	SNVs
I	10082666	0.00558655	Swept	SNVs
I	10082837	0.0276189	Swept	SNVs
I	10083435	0.00558655	Swept	SNVs
I	10083841	0.00558655	Swept	SNVs
I	10084554	0.00558655	Swept	SNVs
I	10085383	0.00558655	Swept	SNVs
I	10085863	0.00558655	Swept	SNVs
I	10085878	0.00558655	Swept	SNVs
I	10086876	0.00558655	Swept	SNVs
I	10090398	0.00558655	Swept	SNVs
I	10094247	0.00558655	Swept	SNVs
I	1009596	0.00558655	Swept	SNVs
I	1009624	0.00558655	Swept	SNVs
I	10097150	0.00558655	Swept	SNVs
I	10097249	0.00558655	Swept	SNVs
I	10097273	0.0221579	Swept	SNVs
I	1009750	0.224498	Swept	SNVs
I	10097524	0.0166655	Swept	SNVs
I	1009766	0.00558655	Swept	SNVs
I	10097706	0.00558655	Swept	SNVs
I	10098413	0.00558655	Swept	SNVs
I	10098576	0.0111417	Swept	SNVs
I	10099094	0.0384468	Swept	SNVs
I	1009932	0.00558655	Swept	SNVs
I	10099333	0.00558655	Swept	SNVs
I	10099480	0.00558655	Swept	SNVs
I	10099556	0.0111417	Swept	SNVs
I	10099747	0.00558655	Swept	SNVs
I	10100282	0.00558655	Swept	SNVs
I	1010124	0.00558655	Swept	SNVs
I	10101953	0.00558655	Swept	SNVs
I	10101983	0.00558655	Swept	SNVs
I	10102689	0.00558655	Swept	SNVs
I	10105045	0.00558655	Swept	SNVs
I	1010519	0.00558655	Swept	SNVs
I	1010552	0.0438136	Swept	SNVs
I	10105597	0.0166655	Swept	SNVs
I	10106740	0.0384468	Swept	SNVs
I	10107826	0.00558655	Swept	SNVs
I	10108145	0.0649672	Swept	SNVs
I	10108240	0.00558655	Swept	SNVs
I	10108417	0.00558655	Swept	SNVs
I	10108936	0.00558655	Swept	SNVs
I	10109805	0.00558655	Swept	SNVs
I	10110304	0.0649672	Swept	SNVs
I	10112659	0.00558655	Swept	SNVs
I	10112683	0.00558655	Swept	SNVs
I	10113748	0.00558655	Swept	SNVs
I	10113939	0.00558655	Swept	SNVs
I	10115444	0.00558655	Swept	SNVs
I	10115462	0.00558655	Swept	SNVs
I	10116014	0.00558655	Swept	SNVs
I	10116387	0.00558655	Swept	SNVs
I	10116389	0.00558655	Swept	SNVs
I	10116893	0.00558655	Swept	SNVs
I	10117131	0.0111417	Swept	SNVs
I	10117371	0.00558655	Swept	SNVs
I	10117524	0.0111417	Swept	SNVs
I	10117543	0.0166655	Swept	SNVs
I	10117621	0.00558655	Swept	SNVs
I	10118428	0.00558655	Swept	SNVs
I	10118616	0.00558655	Swept	SNVs
I	10119014	0.0166655	Swept	SNVs
I	10119228	0.0111417	Swept	SNVs
I	1012012	0.00558655	Swept	SNVs
I	10120732	0.00558655	Swept	SNVs
I	10121055	0.00558655	Swept	SNVs
I	10121244	0.00558655	Swept	SNVs
I	10121974	0.00558655	Swept	SNVs
I	10122590	0.00558655	Swept	SNVs
I	10122886	0.0111417	Swept	SNVs
I	10124296	0.00558655	Swept	SNVs
I	10124537	0.00558655	Swept	SNVs
I	10125138	0.00558655	Swept	SNVs
I	10125950	0.00558655	Swept	SNVs
I	10126982	0.00558655	Swept	SNVs
I	10127037	0.00558655	Swept	SNVs
I	10127258	0.00558655	Swept	SNVs
I	10128015	0.00558655	Swept	SNVs
I	10128139	0.00558655	Swept	SNVs
I	10128533	0.00558655	Swept	SNVs
I	10130142	0.00558655	Swept	SNVs
I	10130412	0.00558655	Swept	SNVs
I	10130524	0.00558655	Swept	SNVs
I	10133491	0.0111417	Swept	SNVs
I	10133779	0.00558655	Swept	SNVs
I	10133847	0.00558655	Swept	SNVs
I	10134554	0.00558655	Swept	SNVs
I	10135861	0.00558655	Swept	SNVs
I	10135916	0.0111417	Swept	SNVs
I	10136608	0.00558655	Swept	SNVs
I	10137957	0.00558655	Swept	SNVs
I	10138193	0.0166655	Swept	SNVs
I	10138404	0.00558655	Swept	SNVs
I	10138839	0.00558655	Swept	SNVs
I	10139063	0.00558655	Swept	SNVs
I	10139084	0.0166655	Swept	SNVs
I	10140468	0.00558655	Swept	SNVs
I	10140528	0.00558655	Swept	SNVs
I	10142909	0.00558655	Swept	SNVs
I	10142948	0.00558655	Swept	SNVs
I	10143826	0.00558655	Swept	SNVs
I	10144121	0.00558655	Swept	SNVs
I	10145376	0.00558655	Swept	SNVs
I	10146161	0.0276189	Swept	SNVs
I	1014680	0.00558655	Swept	SNVs
I	10147110	0.00558655	Swept	SNVs
I	10147266	0.00558655	Swept	SNVs
I	10148482	0.105768	Swept	SNVs
I	10148780	0.00558655	Swept	SNVs
I	1014936	0.0111417	Swept	SNVs
I	10149798	0.00558655	Swept	SNVs
I	10150127	0.00558655	Swept	SNVs
I	10150901	0.00558655	Swept	SNVs
I	10151582	0.00558655	Swept	SNVs
I	10152154	0.0111417	Swept	SNVs
I	10153408	0.0111417	Swept	SNVs
I	10154222	0.00558655	Swept	SNVs
I	10154862	0.0166655	Swept	SNVs
I	10155083	0.0111417	Swept	SNVs
I	10155477	0.00558655	Swept	SNVs
I	10155800	0.00558655	Swept	SNVs
I	10155999	0.00558655	Swept	SNVs
I	10156683	0.00558655	Swept	SNVs
I	10156966	0.00558655	Swept	SNVs
I	10157458	0.00558655	Swept	SNVs
I	10159288	0.0111417	Swept	SNVs
I	10159520	0.0276189	Swept	SNVs
I	10160131	0.00558655	Swept	SNVs
I	1016031	0.00558655	Swept	SNVs
I	10160942	0.00558655	Swept	SNVs
I	1016104	0.0166655	Swept	SNVs
I	10161733	0.0111417	Swept	SNVs
I	10161781	0.00558655	Swept	SNVs
I	10161989	0.00558655	Swept	SNVs
I	10162190	0.00558655	Swept	SNVs
I	10162350	0.0330485	Swept	SNVs
I	10162363	0.00558655	Swept	SNVs
I	1016288	0.00558655	Swept	SNVs
I	10163647	0.00558655	Swept	SNVs
I	10165195	0.00558655	Swept	SNVs
I	10165248	0.00558655	Swept	SNVs
I	10168230	0.00558655	Swept	SNVs
I	10168847	0.0276189	Swept	SNVs
I	10169887	0.00558655	Swept	SNVs
I	10170746	0.00558655	Swept	SNVs
I	10171157	0.0166655	Swept	SNVs
I	1017177	0.00558655	Swept	SNVs
I	10172735	0.00558655	Swept	SNVs
I	10172757	0.00558655	Swept	SNVs
I	10172923	0.00558655	Swept	SNVs
I	1017479	0.0111417	Swept	SNVs
I	10174828	0.00558655	Swept	SNVs
I	10175017	0.0111417	Swept	SNVs
I	10175449	0.00558655	Swept	SNVs
I	10175693	0.00558655	Swept	SNVs
I	10175996	0.00558655	Swept	SNVs
I	10177804	0.00558655	Swept	SNVs
I	1017876	0.0221579	Swept	SNVs
I	10179106	0.00558655	Swept	SNVs
I	10179912	0.0111417	Swept	SNVs
I	10180916	0.00558655	Swept	SNVs
I	10181436	0.00558655	Swept	SNVs
I	10181701	0.00558655	Swept	SNVs
I	10182707	0.00558655	Swept	SNVs
I	1018300	0.00558655	Swept	SNVs
I	10184553	0.00558655	Swept	SNVs
I	10185100	0.00558655	Swept	SNVs
I	10185776	0.00558655	Swept	SNVs
I	10187688	0.00558655	Swept	SNVs
I	10187837	0.00558655	Swept	SNVs
I	10188907	0.00558655	Swept	SNVs
I	1018894	0.0276189	Swept	SNVs
I	1018935	0.00558655	Swept	SNVs
I	10192236	0.00558655	Swept	SNVs
I	10192967	0.00558655	Swept	SNVs
I	10194010	0.00558655	Swept	SNVs
I	101948	0.0221579	Swept	SNVs
I	10196150	0.0166655	Swept	SNVs
I	10197200	0.00558655	Swept	SNVs
I	10198013	0.00558655	Swept	SNVs
I	10198139	0.0276189	Swept	SNVs
I	10198175	0.00558655	Swept	SNVs
I	10198403	0.00558655	Swept	SNVs
I	1020194	0.0221579	Swept	SNVs
I	10202209	0.0111417	Swept	SNVs
I	10220134	0.00558655	Swept	SNVs
I	102208	0.00558655	Swept	SNVs
I	10233378	0.00558655	Swept	SNVs
I	10233436	0.0111417	Swept	SNVs
I	10234121	0.00558655	Swept	SNVs
I	10234458	0.00558655	Swept	SNVs
I	10234769	0.00558655	Swept	SNVs
I	10235113	0.00558655	Swept	SNVs
I	10235136	0.00558655	Swept	SNVs
I	10237087	0.00558655	Swept	SNVs
I	10237562	0.0111417	Swept	SNVs
I	10237603	0.00558655	Swept	SNVs
I	10237810	0.00558655	Swept	SNVs
I	10237953	0.00558655	Swept	SNVs
I	10238770	0.00558655	Swept	SNVs
I	10241767	0.00558655	Swept	SNVs
I	1024224	0.0221579	Swept	SNVs
I	10243843	0.00558655	Swept	SNVs
I	10243844	0.0111417	Swept	SNVs
I	10243905	0.00558655	Swept	SNVs
I	10244446	0.0111417	Swept	SNVs
I	10244952	0.0166655	Swept	SNVs
I	10245606	0.00558655	Swept	SNVs
I	10246932	0.00558655	Swept	SNVs
I	10248233	0.00558655	Swept	SNVs
I	10248650	0.00558655	Swept	SNVs
I	10248727	0.00558655	Swept	SNVs
I	10249091	0.00558655	Swept	SNVs
I	10250855	0.00558655	Swept	SNVs
I	10250988	0.00558655	Swept	SNVs
I	10251352	0.00558655	Swept	SNVs
I	10252947	0.00558655	Swept	SNVs
I	10254176	0.00558655	Swept	SNVs
I	10254991	0.00558655	Swept	SNVs
I	10258784	0.00558655	Swept	SNVs
I	10259955	0.00558655	Swept	SNVs
I	10262740	0.0276189	Swept	SNVs
I	10263328	0.0111417	Swept	SNVs
I	10264920	0.00558655	Swept	SNVs
I	10265043	0.0111417	Swept	SNVs
I	10265116	0.00558655	Swept	SNVs
I	10265291	0.00558655	Swept	SNVs
I	10266607	0.00558655	Swept	SNVs
I	10277264	0.00558655	Swept	SNVs
I	10277277	0.00558655	Swept	SNVs
I	10277309	0.0166655	Swept	SNVs
I	10278851	0.00558655	Swept	SNVs
I	10279046	0.00558655	Swept	SNVs
I	10280543	0.00558655	Swept	SNVs
I	10280896	0.00558655	Swept	SNVs
I	10281247	0.00558655	Swept	SNVs
I	10282195	0.00558655	Swept	SNVs
I	10282360	0.00558655	Swept	SNVs
I	10284414	0.00558655	Swept	SNVs
I	10284999	0.00558655	Swept	SNVs
I	10286529	0.0111417	Swept	SNVs
I	10287107	0.00558655	Swept	SNVs
I	10287510	0.0166655	Swept	SNVs
I	10288113	0.0111417	Swept	SNVs
I	10288336	0.0111417	Swept	SNVs
I	10288528	0.0111417	Swept	SNVs
I	10289078	0.00558655	Swept	SNVs
I	10289395	0.00558655	Swept	SNVs
I	10289784	0.00558655	Swept	SNVs
I	10289982	0.00558655	Swept	SNVs
I	10290890	0.00558655	Swept	SNVs
I	10293460	0.00558655	Swept	SNVs
I	10293614	0.00558655	Swept	SNVs
I	10294013	0.00558655	Swept	SNVs
I	10295812	0.00558655	Swept	SNVs
I	10296177	0.0111417	Swept	SNVs
I	10296241	0.0330485	Swept	SNVs
I	10296509	0.00558655	Swept	SNVs
I	10296635	0.00558655	Swept	SNVs
I	10296709	0.00558655	Swept	SNVs
I	10296781	0.00558655	Swept	SNVs
I	10297708	0.00558655	Swept	SNVs
I	10298017	0.00558655	Swept	SNVs
I	10298230	0.00558655	Swept	SNVs
I	10298750	0.0111417	Swept	SNVs
I	10299127	0.0166655	Swept	SNVs
I	10299751	0.00558655	Swept	SNVs
I	10299832	0.0330485	Swept	SNVs
I	10300142	0.00558655	Swept	SNVs
I	10300828	0.00558655	Swept	SNVs
I	10301654	0.00558655	Swept	SNVs
I	10301667	0.00558655	Swept	SNVs
I	10302153	0.00558655	Swept	SNVs
I	10302176	0.00558655	Swept	SNVs
I	10302577	0.00558655	Swept	SNVs
I	10304792	0.00558655	Swept	SNVs
I	1030812	0.00558655	Swept	SNVs
I	10309180	0.00558655	Swept	SNVs
I	10310647	0.00558655	Swept	SNVs
I	1031097	0.00558655	Swept	SNVs
I	1031138	0.00558655	Swept	SNVs
I	1031228	0.0111417	Swept	SNVs
I	10312574	0.00558655	Swept	SNVs
I	103158	0.0111417	Swept	SNVs
I	10316776	0.00558655	Swept	SNVs
I	10317175	0.00558655	Swept	SNVs
I	10320286	0.00558655	Swept	SNVs
I	10321314	0.00558655	Swept	SNVs
I	1032177	0.0166655	Swept	SNVs
I	10322813	0.0111417	Swept	SNVs
I	10323776	0.00558655	Swept	SNVs
I	10324245	0.00558655	Swept	SNVs
I	10324546	0.0111417	Swept	SNVs
I	10324611	0.0330485	Swept	SNVs
I	10324973	0.00558655	Swept	SNVs
I	10325133	0.0111417	Swept	SNVs
I	10327395	0.0111417	Swept	SNVs
I	10327413	0.00558655	Swept	SNVs
I	10328620	0.00558655	Swept	SNVs
I	1032959	0.00558655	Swept	SNVs
I	1033036	0.207612	Swept	SNVs
I	10330922	0.00558655	Swept	SNVs
I	1033117	0.00558655	Swept	SNVs
I	10331449	0.00558655	Swept	SNVs
I	10332635	0.00558655	Swept	SNVs
I	10333067	0.00558655	Swept	SNVs
I	10333235	0.00558655	Swept	SNVs
I	10334392	0.0111417	Swept	SNVs
I	10334826	0.0111417	Swept	SNVs
I	10334878	0.00558655	Swept	SNVs
I	10335925	0.0276189	Swept	SNVs
I	10336272	0.0166655	Swept	SNVs
I	10337703	0.0111417	Swept	SNVs
I	10338189	0.00558655	Swept	SNVs
I	10338463	0.00558655	Swept	SNVs
I	10338731	0.00558655	Swept	SNVs
I	10338785	0.00558655	Swept	SNVs
I	10341297	0.00558655	Swept	SNVs
I	10341693	0.00558655	Swept	SNVs
I	1034172	0.00558655	Swept	SNVs
I	10341998	0.00558655	Swept	SNVs
I	10342053	0.00558655	Swept	SNVs
I	10342275	0.00558655	Swept	SNVs
I	10342790	0.00558655	Swept	SNVs
I	10342802	0.0221579	Swept	SNVs
I	1034291	0.00558655	Swept	SNVs
I	10345451	0.00558655	Swept	SNVs
I	10345635	0.0111417	Swept	SNVs
I	10345690	0.0111417	Swept	SNVs
I	10345712	0.00558655	Swept	SNVs
I	10346845	0.0111417	Swept	SNVs
I	10347007	0.00558655	Swept	SNVs
I	10347428	0.00558655	Swept	SNVs
I	10347610	0.00558655	Swept	SNVs
I	10347960	0.00558655	Swept	SNVs
I	10349248	0.00558655	Swept	SNVs
I	10349381	0.00558655	Swept	SNVs
I	10349674	0.0111417	Swept	SNVs
I	10349710	0.00558655	Swept	SNVs
I	10350164	0.00558655	Swept	SNVs
I	10351020	0.0330485	Swept	SNVs
I	10351088	0.0276189	Swept	SNVs
I	10351886	0.00558655	Swept	SNVs
I	10351939	0.00558655	Swept	SNVs
I	10352010	0.00558655	Swept	SNVs
I	10352648	0.00558655	Swept	SNVs
I	10352681	0.0111417	Swept	SNVs
I	10352723	0.00558655	Swept	SNVs
I	10353458	0.00558655	Swept	SNVs
I	10353837	0.00558655	Swept	SNVs
I	10354260	0.0166655	Swept	SNVs
I	10354307	0.00558655	Swept	SNVs
I	10354841	0.00558655	Swept	SNVs
I	10354853	0.0111417	Swept	SNVs
I	10355219	0.00558655	Swept	SNVs
I	10355830	0.0111417	Swept	SNVs
I	10356319	0.00558655	Swept	SNVs
I	10357280	0.00558655	Swept	SNVs
I	10358020	0.00558655	Swept	SNVs
I	10358335	0.00558655	Swept	SNVs
I	10359287	0.0221579	Swept	SNVs
I	10359314	0.00558655	Swept	SNVs
I	10359847	0.00558655	Swept	SNVs
I	10359877	0.00558655	Swept	SNVs
I	10360398	0.0384468	Swept	SNVs
I	10361604	0.00558655	Swept	SNVs
I	10361612	0.00558655	Swept	SNVs
I	10364767	0.00558655	Swept	SNVs
I	10364956	0.00558655	Swept	SNVs
I	10365209	0.00558655	Swept	SNVs
I	10365526	0.00558655	Swept	SNVs
I	10367487	0.00558655	Swept	SNVs
I	10367913	0.00558655	Swept	SNVs
I	10369336	0.00558655	Swept	SNVs
I	10369704	0.00558655	Swept	SNVs
I	10369749	0.00558655	Swept	SNVs
I	10370094	0.00558655	Swept	SNVs
I	10370216	0.00558655	Swept	SNVs
I	10370927	0.00558655	Swept	SNVs
I	10371491	0.00558655	Swept	SNVs
I	10371697	0.00558655	Swept	SNVs
I	10372389	0.00558655	Swept	SNVs
I	10372743	0.0384468	Swept	SNVs
I	10372850	0.0276189	Swept	SNVs
I	10373352	0.00558655	Swept	SNVs
I	10374045	0.00558655	Swept	SNVs
I	1037421	0.00558655	Swept	SNVs
I	10375318	0.00558655	Swept	SNVs
I	10375808	0.00558655	Swept	SNVs
I	10376703	0.0597259	Swept	SNVs
I	10376803	0.00558655	Swept	SNVs
I	10377291	0.00558655	Swept	SNVs
I	10378703	0.00558655	Swept	SNVs
I	10378913	0.00558655	Swept	SNVs
I	10379826	0.00558655	Swept	SNVs
I	10380233	0.00558655	Swept	SNVs
I	10380514	0.0166655	Swept	SNVs
I	10381687	0.00558655	Swept	SNVs
I	10381767	0.0111417	Swept	SNVs
I	10382122	0.00558655	Swept	SNVs
I	10383435	0.0111417	Swept	SNVs
I	10383474	0.0805028	Swept	SNVs
I	10384520	0.00558655	Swept	SNVs
I	10385390	0.0330485	Swept	SNVs
I	10385618	0.00558655	Swept	SNVs
I	10387885	0.00558655	Swept	SNVs
I	10388626	0.00558655	Swept	SNVs
I	1038867	0.0276189	Swept	SNVs
I	10389012	0.0221579	Swept	SNVs
I	1038911	0.426367	Swept	SNVs
I	10390855	0.00558655	Swept	SNVs
I	10392401	0.00558655	Swept	SNVs
I	10392465	0.00558655	Swept	SNVs
I	10394488	0.00558655	Swept	SNVs
I	10395104	0.00558655	Swept	SNVs
I	10395613	0.0111417	Swept	SNVs
I	10395938	0.0111417	Swept	SNVs
I	10395939	0.00558655	Swept	SNVs
I	10396024	0.00558655	Swept	SNVs
I	10396575	0.00558655	Swept	SNVs
I	10397749	0.00558655	Swept	SNVs
I	10398034	0.0276189	Swept	SNVs
I	10398197	0.00558655	Swept	SNVs
I	10399201	0.00558655	Swept	SNVs
I	10399280	0.00558655	Swept	SNVs
I	10400526	0.00558655	Swept	SNVs
I	10400893	0.0111417	Swept	SNVs
I	10401037	0.00558655	Swept	SNVs
I	10401709	0.00558655	Swept	SNVs
I	10401820	0.00558655	Swept	SNVs
I	10402183	0.00558655	Swept	SNVs
I	10402262	0.0111417	Swept	SNVs
I	10403218	0.00558655	Swept	SNVs
I	10403371	0.00558655	Swept	SNVs
I	10403616	0.00558655	Swept	SNVs
I	10403912	0.0221579	Swept	SNVs
I	10404460	0.00558655	Swept	SNVs
I	10404514	0.00558655	Swept	SNVs
I	10404897	0.0221579	Swept	SNVs
I	10405136	0.0330485	Swept	SNVs
I	10405340	0.0111417	Swept	SNVs
I	10405438	0.0166655	Swept	SNVs
I	10405550	0.0276189	Swept	SNVs
I	10406678	0.00558655	Swept	SNVs
I	10406951	0.00558655	Swept	SNVs
I	10407779	0.00558655	Swept	SNVs
I	10407891	0.0330485	Swept	SNVs
I	10409511	0.00558655	Swept	SNVs
I	10410073	0.00558655	Swept	SNVs
I	10410932	0.00558655	Swept	SNVs
I	10411508	0.00558655	Swept	SNVs
I	10411727	0.00558655	Swept	SNVs
I	10411969	0.0276189	Swept	SNVs
I	10412210	0.00558655	Swept	SNVs
I	10412826	0.0384468	Swept	SNVs
I	10414088	0.00558655	Swept	SNVs
I	10414743	0.0111417	Swept	SNVs
I	10418137	0.100778	Swept	SNVs
I	10418721	0.00558655	Swept	SNVs
I	10419283	0.00558655	Swept	SNVs
I	10419565	0.00558655	Swept	SNVs
I	10419710	0.00558655	Swept	SNVs
I	10419859	0.00558655	Swept	SNVs
I	10420704	0.00558655	Swept	SNVs
I	10420749	0.00558655	Swept	SNVs
I	10420792	0.00558655	Swept	SNVs
I	10421463	0.0111417	Swept	SNVs
I	10421466	0.00558655	Swept	SNVs
I	10422440	0.00558655	Swept	SNVs
I	10422957	0.0166655	Swept	SNVs
I	10422958	0.00558655	Swept	SNVs
I	10422993	0.0330485	Swept	SNVs
I	10423017	0.00558655	Swept	SNVs
I	10423280	0.0111417	Swept	SNVs
I	10423721	0.00558655	Swept	SNVs
I	10423887	0.00558655	Swept	SNVs
I	10424892	0.00558655	Swept	SNVs
I	10425026	0.0111417	Swept	SNVs
I	10427310	0.0166655	Swept	SNVs
I	10428249	0.00558655	Swept	SNVs
I	10429779	0.00558655	Swept	SNVs
I	10429813	0.00558655	Swept	SNVs
I	10430815	0.0111417	Swept	SNVs
I	10431553	0.0111417	Swept	SNVs
I	10432137	0.00558655	Swept	SNVs
I	10432271	0.00558655	Swept	SNVs
I	10432307	0.0221579	Swept	SNVs
I	10432937	0.00558655	Swept	SNVs
I	10434148	0.00558655	Swept	SNVs
I	1043478	0.0166655	Swept	SNVs
I	10435169	0.0111417	Swept	SNVs
I	10435469	0.0276189	Swept	SNVs
I	10435677	0.0597259	Swept	SNVs
I	1043637	0.0166655	Swept	SNVs
I	10436440	0.00558655	Swept	SNVs
I	10437441	0.00558655	Swept	SNVs
I	10437495	0.00558655	Swept	SNVs
I	10437990	0.0221579	Swept	SNVs
I	10438728	0.00558655	Swept	SNVs
I	10438869	0.0491491	Swept	SNVs
I	10439054	0.00558655	Swept	SNVs
I	10439528	0.00558655	Swept	SNVs
I	10439544	0.149268	Swept	SNVs
I	10439563	0.00558655	Swept	SNVs
I	10439618	0.00558655	Swept	SNVs
I	10440522	0.0111417	Swept	SNVs
I	10441439	0.0111417	Swept	SNVs
I	10441529	0.00558655	Swept	SNVs
I	10441929	0.0330485	Swept	SNVs
I	10442524	0.00558655	Swept	SNVs
I	10442756	0.00558655	Swept	SNVs
I	10444317	0.0805028	Swept	SNVs
I	10444987	0.00558655	Swept	SNVs
I	10445394	0.00558655	Swept	SNVs
I	10445894	0.00558655	Swept	SNVs
I	10448222	0.00558655	Swept	SNVs
I	10448338	0.00558655	Swept	SNVs
I	10448758	0.00558655	Swept	SNVs
I	10448784	0.00558655	Swept	SNVs
I	10450783	0.00558655	Swept	SNVs
I	10451716	0.0491491	Swept	SNVs
I	10451759	0.00558655	Swept	SNVs
I	10452201	0.00558655	Swept	SNVs
I	10452244	0.00558655	Swept	SNVs
I	10452377	0.0111417	Swept	SNVs
I	10452483	0.00558655	Swept	SNVs
I	10452616	0.00558655	Swept	SNVs
I	104530	0.00558655	Swept	SNVs
I	10453439	0.0330485	Swept	SNVs
I	10453743	0.00558655	Swept	SNVs
I	10454105	0.0384468	Swept	SNVs
I	10454280	0.0111417	Swept	SNVs
I	10456085	0.00558655	Swept	SNVs
I	10456258	0.0753556	Swept	SNVs
I	10456346	0.0111417	Swept	SNVs
I	10456567	0.00558655	Swept	SNVs
I	10456876	0.0166655	Swept	SNVs
I	10457272	0.00558655	Swept	SNVs
I	10459235	0.0384468	Swept	SNVs
I	10459393	0.0111417	Swept	SNVs
I	10459489	0.00558655	Swept	SNVs
I	10459605	0.00558655	Swept	SNVs
I	10461898	0.0111417	Swept	SNVs
I	10461966	0.00558655	Swept	SNVs
I	10462283	0.00558655	Swept	SNVs
I	10463331	0.0330485	Swept	SNVs
I	10463580	0.00558655	Swept	SNVs
I	10464418	0.0166655	Swept	SNVs
I	10464504	0.0111417	Swept	SNVs
I	10465402	0.0753556	Swept	SNVs
I	10465499	0.0330485	Swept	SNVs
I	10465540	0.00558655	Swept	SNVs
I	10466516	0.0166655	Swept	SNVs
I	10466604	0.00558655	Swept	SNVs
I	10467951	0.0221579	Swept	SNVs
I	10468857	0.00558655	Swept	SNVs
I	10469785	0.00558655	Swept	SNVs
I	10470116	0.00558655	Swept	SNVs
I	10470955	0.00558655	Swept	SNVs
I	10471188	0.00558655	Swept	SNVs
I	10471972	0.00558655	Swept	SNVs
I	10471975	0.00558655	Swept	SNVs
I	10473239	0.00558655	Swept	SNVs
I	10473889	0.00558655	Swept	SNVs
I	10473942	0.00558655	Swept	SNVs
I	10474375	0.0111417	Swept	SNVs
I	10474539	0.00558655	Swept	SNVs
I	10474704	0.00558655	Swept	SNVs
I	10474818	0.0166655	Swept	SNVs
I	10475490	0.0111417	Swept	SNVs
I	10475518	0.0111417	Swept	SNVs
I	10475810	0.00558655	Swept	SNVs
I	10477128	0.00558655	Swept	SNVs
I	10477412	0.00558655	Swept	SNVs
I	10477436	0.0111417	Swept	SNVs
I	10478377	0.00558655	Swept	SNVs
I	10478795	0.00558655	Swept	SNVs
I	10479113	0.0438136	Swept	SNVs
I	10479229	0.0221579	Swept	SNVs
I	10479878	0.00558655	Swept	SNVs
I	10481773	0.00558655	Swept	SNVs
I	10483767	0.00558655	Swept	SNVs
I	10483897	0.00558655	Swept	SNVs
I	10485239	0.0384468	Swept	SNVs
I	10485867	0.0111417	Swept	SNVs
I	10486011	0.0221579	Swept	SNVs
I	10486040	0.00558655	Swept	SNVs
I	10486334	0.0221579	Swept	SNVs
I	10486951	0.00558655	Swept	SNVs
I	10487196	0.0166655	Swept	SNVs
I	10488637	0.00558655	Swept	SNVs
I	10489100	0.00558655	Swept	SNVs
I	10489971	0.00558655	Swept	SNVs
I	10490274	0.00558655	Swept	SNVs
I	10490387	0.00558655	Swept	SNVs
I	10491126	0.00558655	Swept	SNVs
I	10491754	0.00558655	Swept	SNVs
I	10491842	0.00558655	Swept	SNVs
I	10491956	0.0221579	Swept	SNVs
I	10492929	0.00558655	Swept	SNVs
I	10493107	0.0111417	Swept	SNVs
I	10493109	0.00558655	Swept	SNVs
I	10493362	0.00558655	Swept	SNVs
I	10493501	0.00558655	Swept	SNVs
I	10493580	0.00558655	Swept	SNVs
I	10494983	0.0221579	Swept	SNVs
I	10497045	0.0221579	Swept	SNVs
I	10497541	0.00558655	Swept	SNVs
I	10497948	0.0111417	Swept	SNVs
I	10498373	0.0111417	Swept	SNVs
I	10498735	0.0166655	Swept	SNVs
I	104988	0.00558655	Swept	SNVs
I	10500917	0.00558655	Swept	SNVs
I	10502553	0.00558655	Swept	SNVs
I	10503393	0.0221579	Swept	SNVs
I	10503785	0.00558655	Swept	SNVs
I	10504205	0.00558655	Swept	SNVs
I	10504228	0.0384468	Swept	SNVs
I	10504789	0.00558655	Swept	SNVs
I	10505495	0.00558655	Swept	SNVs
I	10505548	0.00558655	Swept	SNVs
I	10506589	0.00558655	Swept	SNVs
I	10507227	0.0111417	Swept	SNVs
I	1050825	0.00558655	Swept	SNVs
I	10508323	0.00558655	Swept	SNVs
I	10508610	0.00558655	Swept	SNVs
I	1050975	0.00558655	Swept	SNVs
I	10509911	0.0111417	Swept	SNVs
I	10509929	0.00558655	Swept	SNVs
I	10510845	0.00558655	Swept	SNVs
I	10511863	0.0166655	Swept	SNVs
I	10512127	0.00558655	Swept	SNVs
I	105133	0.0753556	Swept	SNVs
I	10513311	0.0221579	Swept	SNVs
I	10513764	0.00558655	Swept	SNVs
I	10513995	0.0111417	Swept	SNVs
I	1051416	0.00558655	Swept	SNVs
I	10514326	0.00558655	Swept	SNVs
I	10514418	0.0111417	Swept	SNVs
I	10515311	0.0111417	Swept	SNVs
I	10515461	0.00558655	Swept	SNVs
I	10515468	0.0166655	Swept	SNVs
I	10515784	0.00558655	Swept	SNVs
I	10516194	0.0111417	Swept	SNVs
I	10516427	0.00558655	Swept	SNVs
I	10516805	0.00558655	Swept	SNVs
I	1051765	0.00558655	Swept	SNVs
I	10517997	0.00558655	Swept	SNVs
I	10518268	0.00558655	Swept	SNVs
I	10518482	0.00558655	Swept	SNVs
I	10518589	0.00558655	Swept	SNVs
I	10518968	0.0276189	Swept	SNVs
I	1051922	0.0438136	Swept	SNVs
I	1051968	0.0438136	Swept	SNVs
I	10519729	0.00558655	Swept	SNVs
I	10520640	0.0384468	Swept	SNVs
I	10521097	0.00558655	Swept	SNVs
I	10522602	0.00558655	Swept	SNVs
I	10522679	0.00558655	Swept	SNVs
I	10524165	0.00558655	Swept	SNVs
I	10524791	0.0166655	Swept	SNVs
I	10524844	0.0491491	Swept	SNVs
I	10524892	0.00558655	Swept	SNVs
I	10524935	0.0221579	Swept	SNVs
I	10525010	0.00558655	Swept	SNVs
I	10525448	0.0111417	Swept	SNVs
I	10525556	0.00558655	Swept	SNVs
I	10526062	0.00558655	Swept	SNVs
I	10526140	0.0221579	Swept	SNVs
I	10526543	0.00558655	Swept	SNVs
I	10526973	0.0221579	Swept	SNVs
I	10527013	0.00558655	Swept	SNVs
I	10527208	0.00558655	Swept	SNVs
I	10527212	0.0111417	Swept	SNVs
I	10527659	0.00558655	Swept	SNVs
I	10527867	0.0166655	Swept	SNVs
I	10529922	0.00558655	Swept	SNVs
I	10530096	0.00558655	Swept	SNVs
I	10530334	0.00558655	Swept	SNVs
I	10530815	0.00558655	Swept	SNVs
I	10531426	0.00558655	Swept	SNVs
I	1053181	0.0491491	Swept	SNVs
I	10531857	0.00558655	Swept	SNVs
I	10532063	0.00558655	Swept	SNVs
I	10532285	0.00558655	Swept	SNVs
I	10532410	0.00558655	Swept	SNVs
I	10532751	0.00558655	Swept	SNVs
I	10533191	0.00558655	Swept	SNVs
I	10533230	0.00558655	Swept	SNVs
I	10533336	0.0166655	Swept	SNVs
I	10533515	0.00558655	Swept	SNVs
I	10533524	0.00558655	Swept	SNVs
I	10533665	0.0384468	Swept	SNVs
I	10533745	0.0111417	Swept	SNVs
I	10533923	0.00558655	Swept	SNVs
I	10534065	0.0111417	Swept	SNVs
I	10534160	0.00558655	Swept	SNVs
I	10534549	0.00558655	Swept	SNVs
I	10534555	0.00558655	Swept	SNVs
I	1053522	0.00558655	Swept	SNVs
I	10536342	0.00558655	Swept	SNVs
I	10536377	0.00558655	Swept	SNVs
I	10537378	0.00558655	Swept	SNVs
I	10537551	0.00558655	Swept	SNVs
I	10537824	0.0221579	Swept	SNVs
I	10537996	0.0221579	Swept	SNVs
I	10538012	0.00558655	Swept	SNVs
I	10538366	0.00558655	Swept	SNVs
I	10538585	0.00558655	Swept	SNVs
I	10539651	0.00558655	Swept	SNVs
I	1053994	0.0221579	Swept	SNVs
I	105408	0.198982	Swept	SNVs
I	10541294	0.00558655	Swept	SNVs
I	10541632	0.00558655	Swept	SNVs
I	10541852	0.0111417	Swept	SNVs
I	10541909	0.00558655	Swept	SNVs
I	10542277	0.00558655	Swept	SNVs
I	10542765	0.00558655	Swept	SNVs
I	1054290	0.00558655	Swept	SNVs
I	10542951	0.00558655	Swept	SNVs
I	10543327	0.00558655	Swept	SNVs
I	10543673	0.0166655	Swept	SNVs
I	1054416	0.00558655	Swept	SNVs
I	10544298	0.00558655	Swept	SNVs
I	10544314	0.00558655	Swept	SNVs
I	10545009	0.0111417	Swept	SNVs
I	10545370	0.00558655	Swept	SNVs
I	10545897	0.00558655	Swept	SNVs
I	10546151	0.00558655	Swept	SNVs
I	10546354	0.00558655	Swept	SNVs
I	10546638	0.00558655	Swept	SNVs
I	10546850	0.00558655	Swept	SNVs
I	10547387	0.0384468	Swept	SNVs
I	10547683	0.00558655	Swept	SNVs
I	10547772	0.00558655	Swept	SNVs
I	10547826	0.00558655	Swept	SNVs
I	10548058	0.00558655	Swept	SNVs
I	10548135	0.0221579	Swept	SNVs
I	10548411	0.00558655	Swept	SNVs
I	10549517	0.00558655	Swept	SNVs
I	10549684	0.00558655	Swept	SNVs
I	10550368	0.00558655	Swept	SNVs
I	10550456	0.0166655	Swept	SNVs
I	10550743	0.00558655	Swept	SNVs
I	10551142	0.0111417	Swept	SNVs
I	10553012	0.00558655	Swept	SNVs
I	10554048	0.00558655	Swept	SNVs
I	10554416	0.00558655	Swept	SNVs
I	10556319	0.00558655	Swept	SNVs
I	10556797	0.00558655	Swept	SNVs
I	10557465	0.00558655	Swept	SNVs
I	10557820	0.0166655	Swept	SNVs
I	10557834	0.00558655	Swept	SNVs
I	10557993	0.00558655	Swept	SNVs
I	10558037	0.00558655	Swept	SNVs
I	10558172	0.0111417	Swept	SNVs
I	10558225	0.0384468	Swept	SNVs
I	10558540	0.105768	Swept	SNVs
I	10558768	0.00558655	Swept	SNVs
I	10559968	0.00558655	Swept	SNVs
I	10560053	0.00558655	Swept	SNVs
I	10560140	0.00558655	Swept	SNVs
I	10560406	0.0221579	Swept	SNVs
I	10560737	0.0166655	Swept	SNVs
I	10560977	0.00558655	Swept	SNVs
I	10561443	0.00558655	Swept	SNVs
I	10562804	0.00558655	Swept	SNVs
I	105642	0.00558655	Swept	SNVs
I	10564493	0.00558655	Swept	SNVs
I	10565173	0.00558655	Swept	SNVs
I	10565254	0.00558655	Swept	SNVs
I	10565411	0.00558655	Swept	SNVs
I	10566267	0.00558655	Swept	SNVs
I	10566535	0.0166655	Swept	SNVs
I	10566782	0.00558655	Swept	SNVs
I	10567518	0.00558655	Swept	SNVs
I	10568854	0.0111417	Swept	SNVs
I	10569109	0.00558655	Swept	SNVs
I	10569179	0.0111417	Swept	SNVs
I	105692	0.00558655	Swept	SNVs
I	10569396	0.00558655	Swept	SNVs
I	10569616	0.00558655	Swept	SNVs
I	10569765	0.00558655	Swept	SNVs
I	10569883	0.0221579	Swept	SNVs
I	10570463	0.00558655	Swept	SNVs
I	10571968	0.00558655	Swept	SNVs
I	10572120	0.0384468	Swept	SNVs
I	10572469	0.00558655	Swept	SNVs
I	10573781	0.0276189	Swept	SNVs
I	10574837	0.00558655	Swept	SNVs
I	10574875	0.00558655	Swept	SNVs
I	10575261	0.00558655	Swept	SNVs
I	10575564	0.0276189	Swept	SNVs
I	10576081	0.00558655	Swept	SNVs
I	10576289	0.00558655	Swept	SNVs
I	10576333	0.00558655	Swept	SNVs
I	10577042	0.0111417	Swept	SNVs
I	10577417	0.00558655	Swept	SNVs
I	10578034	0.0166655	Swept	SNVs
I	10578832	0.0111417	Swept	SNVs
I	10579069	0.00558655	Swept	SNVs
I	10580415	0.0111417	Swept	SNVs
I	10580781	0.00558655	Swept	SNVs
I	10580888	0.00558655	Swept	SNVs
I	10581712	0.0166655	Swept	SNVs
I	10583594	0.00558655	Swept	SNVs
I	10583988	0.00558655	Swept	SNVs
I	10584027	0.00558655	Swept	SNVs
I	10584033	0.0276189	Swept	SNVs
I	10584521	0.00558655	Swept	SNVs
I	10584724	0.00558655	Swept	SNVs
I	10584822	0.00558655	Swept	SNVs
I	10585528	0.00558655	Swept	SNVs
I	10585662	0.00558655	Swept	SNVs
I	10586192	0.00558655	Swept	SNVs
I	10588188	0.00558655	Swept	SNVs
I	1058900	0.377092	Swept	SNVs
I	1058920	0.00558655	Swept	SNVs
I	1058933	0.00558655	Swept	SNVs
I	10589739	0.00558655	Swept	SNVs
I	10590349	0.0111417	Swept	SNVs
I	10590554	0.00558655	Swept	SNVs
I	10590959	0.00558655	Swept	SNVs
I	10591490	0.00558655	Swept	SNVs
I	10591709	0.0166655	Swept	SNVs
I	10591811	0.00558655	Swept	SNVs
I	10592274	0.00558655	Swept	SNVs
I	1059232	0.00558655	Swept	SNVs
I	1059258	0.279641	Swept	SNVs
I	1059264	0.353867	Swept	SNVs
I	10592669	0.00558655	Swept	SNVs
I	10592813	0.0166655	Swept	SNVs
I	10593097	0.00558655	Swept	SNVs
I	10593245	0.0384468	Swept	SNVs
I	10593958	0.0221579	Swept	SNVs
I	10594320	0.00558655	Swept	SNVs
I	105946	0.00558655	Swept	SNVs
I	10596620	0.00558655	Swept	SNVs
I	10596649	0.00558655	Swept	SNVs
I	10596755	0.0649672	Swept	SNVs
I	10597647	0.00558655	Swept	SNVs
I	10597689	0.00558655	Swept	SNVs
I	10598988	0.00558655	Swept	SNVs
I	10600933	0.00558655	Swept	SNVs
I	10601085	0.00558655	Swept	SNVs
I	10601103	0.00558655	Swept	SNVs
I	10601136	0.00558655	Swept	SNVs
I	10603248	0.00558655	Swept	SNVs
I	10603909	0.00558655	Swept	SNVs
I	10603937	0.0221579	Swept	SNVs
I	10604693	0.00558655	Swept	SNVs
I	10604851	0.00558655	Swept	SNVs
I	10606480	0.0111417	Swept	SNVs
I	10606962	0.00558655	Swept	SNVs
I	10606996	0.0221579	Swept	SNVs
I	10607303	0.0221579	Swept	SNVs
I	10607310	0.0276189	Swept	SNVs
I	10607632	0.00558655	Swept	SNVs
I	10608125	0.0166655	Swept	SNVs
I	10608305	0.00558655	Swept	SNVs
I	10609064	0.00558655	Swept	SNVs
I	10609202	0.00558655	Swept	SNVs
I	10610249	0.0597259	Swept	SNVs
I	10610303	0.0221579	Swept	SNVs
I	10611561	0.00558655	Swept	SNVs
I	10612562	0.00558655	Swept	SNVs
I	10613912	0.0111417	Swept	SNVs
I	10615397	0.00558655	Swept	SNVs
I	10615809	0.0221579	Swept	SNVs
I	10615980	0.00558655	Swept	SNVs
I	10617126	0.0111417	Swept	SNVs
I	10617198	0.00558655	Swept	SNVs
I	106174	0.00558655	Swept	SNVs
I	10617408	0.00558655	Swept	SNVs
I	10618079	0.00558655	Swept	SNVs
I	10619961	0.00558655	Swept	SNVs
I	10619978	0.00558655	Swept	SNVs
I	10620272	0.0384468	Swept	SNVs
I	10620928	0.00558655	Swept	SNVs
I	1062111	0.203313	Swept	SNVs
I	1062129	0.00558655	Swept	SNVs
I	10621940	0.0330485	Swept	SNVs
I	10622128	0.0166655	Swept	SNVs
I	10622330	0.0221579	Swept	SNVs
I	10622352	0.0221579	Swept	SNVs
I	10622498	0.0111417	Swept	SNVs
I	10622642	0.0111417	Swept	SNVs
I	1062313	0.0438136	Swept	SNVs
I	10623198	0.00558655	Swept	SNVs
I	10623662	0.0111417	Swept	SNVs
I	10623990	0.00558655	Swept	SNVs
I	10624048	0.0221579	Swept	SNVs
I	10624877	0.0166655	Swept	SNVs
I	10625421	0.0597259	Swept	SNVs
I	10625692	0.00558655	Swept	SNVs
I	10625760	0.0111417	Swept	SNVs
I	10626273	0.00558655	Swept	SNVs
I	10626352	0.00558655	Swept	SNVs
I	10629257	0.00558655	Swept	SNVs
I	10629545	0.00558655	Swept	SNVs
I	10629871	0.00558655	Swept	SNVs
I	10630066	0.00558655	Swept	SNVs
I	10631166	0.0330485	Swept	SNVs
I	10632284	0.00558655	Swept	SNVs
I	10632351	0.00558655	Swept	SNVs
I	10632711	0.00558655	Swept	SNVs
I	10632768	0.00558655	Swept	SNVs
I	10632910	0.0111417	Swept	SNVs
I	10633118	0.00558655	Swept	SNVs
I	1063314	0.00558655	Swept	SNVs
I	10633553	0.00558655	Swept	SNVs
I	1063378	0.00558655	Swept	SNVs
I	10633857	0.0166655	Swept	SNVs
I	10634211	0.00558655	Swept	SNVs
I	10634434	0.00558655	Swept	SNVs
I	10634911	0.0166655	Swept	SNVs
I	10637246	0.00558655	Swept	SNVs
I	1063734	0.00558655	Swept	SNVs
I	10638043	0.0111417	Swept	SNVs
I	10639190	0.00558655	Swept	SNVs
I	10641926	0.00558655	Swept	SNVs
I	10641995	0.00558655	Swept	SNVs
I	10642100	0.00558655	Swept	SNVs
I	10642243	0.00558655	Swept	SNVs
I	10642592	0.00558655	Swept	SNVs
I	10643400	0.0166655	Swept	SNVs
I	10644030	0.0166655	Swept	SNVs
I	10644098	0.00558655	Swept	SNVs
I	10644136	0.00558655	Swept	SNVs
I	10644257	0.00558655	Swept	SNVs
I	10644317	0.0649672	Swept	SNVs
I	1064437	0.0111417	Swept	SNVs
I	10644375	0.00558655	Swept	SNVs
I	1064448	0.464594	Swept	SNVs
I	10645122	0.00558655	Swept	SNVs
I	10645140	0.00558655	Swept	SNVs
I	10645296	0.0111417	Swept	SNVs
I	10646422	0.00558655	Swept	SNVs
I	10646527	0.0166655	Swept	SNVs
I	10646529	0.0111417	Swept	SNVs
I	10646536	0.0166655	Swept	SNVs
I	10647182	0.00558655	Swept	SNVs
I	10647204	0.0166655	Swept	SNVs
I	10647355	0.00558655	Swept	SNVs
I	10647691	0.00558655	Swept	SNVs
I	10648708	0.00558655	Swept	SNVs
I	10648841	0.0111417	Swept	SNVs
I	10648908	0.00558655	Swept	SNVs
I	10649215	0.0166655	Swept	SNVs
I	10649368	0.0597259	Swept	SNVs
I	10649908	0.00558655	Swept	SNVs
I	1065006	0.0221579	Swept	SNVs
I	10650287	0.00558655	Swept	SNVs
I	10650553	0.00558655	Swept	SNVs
I	10651013	0.00558655	Swept	SNVs
I	10651265	0.00558655	Swept	SNVs
I	10651556	0.00558655	Swept	SNVs
I	1065232	0.00558655	Swept	SNVs
I	10652364	0.00558655	Swept	SNVs
I	1065326	0.0111417	Swept	SNVs
I	10653805	0.00558655	Swept	SNVs
I	10653886	0.0111417	Swept	SNVs
I	10654182	0.00558655	Swept	SNVs
I	10654277	0.0111417	Swept	SNVs
I	1065475	0.00558655	Swept	SNVs
I	10655189	0.00558655	Swept	SNVs
I	10655996	0.00558655	Swept	SNVs
I	10656129	0.0221579	Swept	SNVs
I	10656160	0.0221579	Swept	SNVs
I	10656330	0.0111417	Swept	SNVs
I	10656556	0.00558655	Swept	SNVs
I	10656738	0.00558655	Swept	SNVs
I	10656939	0.0166655	Swept	SNVs
I	10657672	0.0330485	Swept	SNVs
I	10658649	0.00558655	Swept	SNVs
I	10658726	0.00558655	Swept	SNVs
I	10659667	0.00558655	Swept	SNVs
I	10660195	0.00558655	Swept	SNVs
I	10660217	0.00558655	Swept	SNVs
I	10660568	0.0384468	Swept	SNVs
I	10660822	0.00558655	Swept	SNVs
I	10661722	0.00558655	Swept	SNVs
I	10661995	0.00558655	Swept	SNVs
I	10662118	0.00558655	Swept	SNVs
I	10663245	0.0166655	Swept	SNVs
I	10664058	0.00558655	Swept	SNVs
I	10665334	0.0649672	Swept	SNVs
I	10665891	0.00558655	Swept	SNVs
I	10666584	0.00558655	Swept	SNVs
I	10666915	0.00558655	Swept	SNVs
I	10667225	0.00558655	Swept	SNVs
I	10667558	0.00558655	Swept	SNVs
I	10667623	0.0166655	Swept	SNVs
I	10668576	0.0111417	Swept	SNVs
I	10668610	0.0166655	Swept	SNVs
I	10668922	0.0111417	Swept	SNVs
I	10668945	0.00558655	Swept	SNVs
I	10669043	0.00558655	Swept	SNVs
I	10669239	0.0276189	Swept	SNVs
I	10670062	0.0166655	Swept	SNVs
I	10670181	0.00558655	Swept	SNVs
I	10670268	0.00558655	Swept	SNVs
I	10670653	0.00558655	Swept	SNVs
I	10670672	0.00558655	Swept	SNVs
I	10671318	0.00558655	Swept	SNVs
I	10671828	0.00558655	Swept	SNVs
I	10672183	0.00558655	Swept	SNVs
I	10672652	0.0907029	Swept	SNVs
I	10672825	0.0221579	Swept	SNVs
I	10673539	0.00558655	Swept	SNVs
I	10674336	0.0221579	Swept	SNVs
I	10674402	0.0111417	Swept	SNVs
I	10674590	0.00558655	Swept	SNVs
I	10674637	0.00558655	Swept	SNVs
I	10674946	0.0597259	Swept	SNVs
I	10675117	0.0221579	Swept	SNVs
I	10675142	0.00558655	Swept	SNVs
I	10675522	0.0221579	Swept	SNVs
I	10675693	0.00558655	Swept	SNVs
I	10676652	0.0111417	Swept	SNVs
I	10677908	0.00558655	Swept	SNVs
I	10678605	0.00558655	Swept	SNVs
I	10678775	0.0166655	Swept	SNVs
I	10678838	0.00558655	Swept	SNVs
I	10678977	0.00558655	Swept	SNVs
I	10680886	0.0856186	Swept	SNVs
I	10680892	0.00558655	Swept	SNVs
I	10681184	0.00558655	Swept	SNVs
I	10681287	0.0166655	Swept	SNVs
I	10681345	0.00558655	Swept	SNVs
I	10683165	0.00558655	Swept	SNVs
I	10683192	0.00558655	Swept	SNVs
I	10683375	0.00558655	Swept	SNVs
I	10683416	0.00558655	Swept	SNVs
I	10683461	0.0221579	Swept	SNVs
I	10683856	0.00558655	Swept	SNVs
I	10685226	0.00558655	Swept	SNVs
I	10685249	0.00558655	Swept	SNVs
I	10685318	0.0221579	Swept	SNVs
I	10685557	0.00558655	Swept	SNVs
I	10685606	0.00558655	Swept	SNVs
I	10685678	0.00558655	Swept	SNVs
I	10685686	0.00558655	Swept	SNVs
I	1068572	0.275906	Swept	SNVs
I	10685884	0.00558655	Swept	SNVs
I	10685978	0.0111417	Swept	SNVs
I	10686590	0.0649672	Swept	SNVs
I	10686810	0.00558655	Swept	SNVs
I	10688098	0.00558655	Swept	SNVs
I	10688389	0.0221579	Swept	SNVs
I	10688420	0.00558655	Swept	SNVs
I	10688455	0.00558655	Swept	SNVs
I	10689009	0.00558655	Swept	SNVs
I	10690531	0.0166655	Swept	SNVs
I	10690684	0.0753556	Swept	SNVs
I	10690704	0.00558655	Swept	SNVs
I	10691255	0.0111417	Swept	SNVs
I	10691706	0.00558655	Swept	SNVs
I	10692058	0.00558655	Swept	SNVs
I	1069264	0.0166655	Swept	SNVs
I	10692916	0.00558655	Swept	SNVs
I	10693531	0.00558655	Swept	SNVs
I	10693718	0.00558655	Swept	SNVs
I	10693760	0.00558655	Swept	SNVs
I	10693877	0.110727	Swept	SNVs
I	10694101	0.0111417	Swept	SNVs
I	10694622	0.0111417	Swept	SNVs
I	10694693	0.00558655	Swept	SNVs
I	10695186	0.0221579	Swept	SNVs
I	1069626	0.0111417	Swept	SNVs
I	10697037	0.00558655	Swept	SNVs
I	10697072	0.0166655	Swept	SNVs
I	10697089	0.00558655	Swept	SNVs
I	10698320	0.00558655	Swept	SNVs
I	10698350	0.00558655	Swept	SNVs
I	10698376	0.0221579	Swept	SNVs
I	1069900	0.0438136	Swept	SNVs
I	10699345	0.0166655	Swept	SNVs
I	10699974	0.00558655	Swept	SNVs
I	10701090	0.00558655	Swept	SNVs
I	10701762	0.00558655	Swept	SNVs
I	10702739	0.0166655	Swept	SNVs
I	10703711	0.00558655	Swept	SNVs
I	10704727	0.00558655	Swept	SNVs
I	10704745	0.00558655	Swept	SNVs
I	10704755	0.0166655	Swept	SNVs
I	10704859	0.00558655	Swept	SNVs
I	10705059	0.00558655	Swept	SNVs
I	10705310	0.0111417	Swept	SNVs
I	10705336	0.00558655	Swept	SNVs
I	10705377	0.0111417	Swept	SNVs
I	10705993	0.0166655	Swept	SNVs
I	10706251	0.00558655	Swept	SNVs
I	10706421	0.00558655	Swept	SNVs
I	10706497	0.00558655	Swept	SNVs
I	10706549	0.00558655	Swept	SNVs
I	10707348	0.00558655	Swept	SNVs
I	10707634	0.0221579	Swept	SNVs
I	10707708	0.00558655	Swept	SNVs
I	10707911	0.0597259	Swept	SNVs
I	10708007	0.00558655	Swept	SNVs
I	10709495	0.00558655	Swept	SNVs
I	10709765	0.00558655	Swept	SNVs
I	10710081	0.0111417	Swept	SNVs
I	10710101	0.0221579	Swept	SNVs
I	10710365	0.00558655	Swept	SNVs
I	10710852	0.00558655	Swept	SNVs
I	10711349	0.00558655	Swept	SNVs
I	10711528	0.0166655	Swept	SNVs
I	10711714	0.00558655	Swept	SNVs
I	10711907	0.00558655	Swept	SNVs
I	10712231	0.00558655	Swept	SNVs
I	10713170	0.0805028	Swept	SNVs
I	1071327	0.0907029	Swept	SNVs
I	10713519	0.00558655	Swept	SNVs
I	10713626	0.0111417	Swept	SNVs
I	10713639	0.00558655	Swept	SNVs
I	10714028	0.0111417	Swept	SNVs
I	10714112	0.0166655	Swept	SNVs
I	10714162	0.00558655	Swept	SNVs
I	1071420	0.00558655	Swept	SNVs
I	10714227	0.00558655	Swept	SNVs
I	10714304	0.00558655	Swept	SNVs
I	10714421	0.00558655	Swept	SNVs
I	10714981	0.0221579	Swept	SNVs
I	10715124	0.0221579	Swept	SNVs
I	10715872	0.0111417	Swept	SNVs
I	1071645	0.0384468	Swept	SNVs
I	10716633	0.00558655	Swept	SNVs
I	10716825	0.0221579	Swept	SNVs
I	10717009	0.0111417	Swept	SNVs
I	107191	0.00558655	Swept	SNVs
I	10719974	0.0649672	Swept	SNVs
I	1071998	0.158589	Swept	SNVs
I	10720181	0.00558655	Swept	SNVs
I	10720408	0.00558655	Swept	SNVs
I	10720635	0.00558655	Swept	SNVs
I	10721982	0.00558655	Swept	SNVs
I	10722141	0.00558655	Swept	SNVs
I	10722269	0.0221579	Swept	SNVs
I	10722336	0.00558655	Swept	SNVs
I	10722832	0.00558655	Swept	SNVs
I	10723189	0.00558655	Swept	SNVs
I	10723698	0.0166655	Swept	SNVs
I	10724577	0.149268	Swept	SNVs
I	10724977	0.00558655	Swept	SNVs
I	10725621	0.00558655	Swept	SNVs
I	10725686	0.0166655	Swept	SNVs
I	10725717	0.00558655	Swept	SNVs
I	10726173	0.0111417	Swept	SNVs
I	10726577	0.00558655	Swept	SNVs
I	10726633	0.0221579	Swept	SNVs
I	10728178	0.00558655	Swept	SNVs
I	10728373	0.0649672	Swept	SNVs
I	10728401	0.00558655	Swept	SNVs
I	10728727	0.0111417	Swept	SNVs
I	10729116	0.0111417	Swept	SNVs
I	10729135	0.0111417	Swept	SNVs
I	10729313	0.0111417	Swept	SNVs
I	1072950	0.00558655	Swept	SNVs
I	10729532	0.00558655	Swept	SNVs
I	10729555	0.00558655	Swept	SNVs
I	10729643	0.0384468	Swept	SNVs
I	10730457	0.00558655	Swept	SNVs
I	10730565	0.0276189	Swept	SNVs
I	10731486	0.00558655	Swept	SNVs
I	10732088	0.00558655	Swept	SNVs
I	10732213	0.00558655	Swept	SNVs
I	10732446	0.00558655	Swept	SNVs
I	10732649	0.0597259	Swept	SNVs
I	10732760	0.0221579	Swept	SNVs
I	10733106	0.00558655	Swept	SNVs
I	10733145	0.0111417	Swept	SNVs
I	10733842	0.00558655	Swept	SNVs
I	10733973	0.00558655	Swept	SNVs
I	10735062	0.00558655	Swept	SNVs
I	10735948	0.00558655	Swept	SNVs
I	10736485	0.0221579	Swept	SNVs
I	10736506	0.00558655	Swept	SNVs
I	10737561	0.0111417	Swept	SNVs
I	1073820	0.0384468	Swept	SNVs
I	10739043	0.0166655	Swept	SNVs
I	10739597	0.00558655	Swept	SNVs
I	10740138	0.0166655	Swept	SNVs
I	10740305	0.00558655	Swept	SNVs
I	10740915	0.0111417	Swept	SNVs
I	10741052	0.00558655	Swept	SNVs
I	10741244	0.00558655	Swept	SNVs
I	10741440	0.00558655	Swept	SNVs
I	10741877	0.00558655	Swept	SNVs
I	10742426	0.00558655	Swept	SNVs
I	10742656	0.00558655	Swept	SNVs
I	10742822	0.0166655	Swept	SNVs
I	10743030	0.00558655	Swept	SNVs
I	10743332	0.00558655	Swept	SNVs
I	10743397	0.00558655	Swept	SNVs
I	10743663	0.0221579	Swept	SNVs
I	10744035	0.00558655	Swept	SNVs
I	10744227	0.0221579	Swept	SNVs
I	10744353	0.00558655	Swept	SNVs
I	10744581	0.0330485	Swept	SNVs
I	10744608	0.00558655	Swept	SNVs
I	10745259	0.00558655	Swept	SNVs
I	10745887	0.00558655	Swept	SNVs
I	10746011	0.00558655	Swept	SNVs
I	10746823	0.0221579	Swept	SNVs
I	10747999	0.00558655	Swept	SNVs
I	10748680	0.00558655	Swept	SNVs
I	10748772	0.00558655	Swept	SNVs
I	10750062	0.0166655	Swept	SNVs
I	10750118	0.0111417	Swept	SNVs
I	10750503	0.0166655	Swept	SNVs
I	10751685	0.00558655	Swept	SNVs
I	10751974	0.00558655	Swept	SNVs
I	10752432	0.0438136	Swept	SNVs
I	10753791	0.00558655	Swept	SNVs
I	10754501	0.00558655	Swept	SNVs
I	10754539	0.00558655	Swept	SNVs
I	10756216	0.0111417	Swept	SNVs
I	10756275	0.00558655	Swept	SNVs
I	10756502	0.0111417	Swept	SNVs
I	10756683	0.00558655	Swept	SNVs
I	10757249	0.0111417	Swept	SNVs
I	10757749	0.00558655	Swept	SNVs
I	10757991	0.00558655	Swept	SNVs
I	10758216	0.0166655	Swept	SNVs
I	10759386	0.00558655	Swept	SNVs
I	10759563	0.00558655	Swept	SNVs
I	10760496	0.00558655	Swept	SNVs
I	10761589	0.00558655	Swept	SNVs
I	10762331	0.00558655	Swept	SNVs
I	10762481	0.00558655	Swept	SNVs
I	10762485	0.00558655	Swept	SNVs
I	10762774	0.00558655	Swept	SNVs
I	10763046	0.00558655	Swept	SNVs
I	10763246	0.00558655	Swept	SNVs
I	10763735	0.00558655	Swept	SNVs
I	10764227	0.00558655	Swept	SNVs
I	10764417	0.00558655	Swept	SNVs
I	10764835	0.00558655	Swept	SNVs
I	10765171	0.0221579	Swept	SNVs
I	10766810	0.00558655	Swept	SNVs
I	10767301	0.0221579	Swept	SNVs
I	10767858	0.00558655	Swept	SNVs
I	10768080	0.0221579	Swept	SNVs
I	10768198	0.00558655	Swept	SNVs
I	10768447	0.0597259	Swept	SNVs
I	10769083	0.0111417	Swept	SNVs
I	10769433	0.00558655	Swept	SNVs
I	10769444	0.00558655	Swept	SNVs
I	10769578	0.0111417	Swept	SNVs
I	10770185	0.00558655	Swept	SNVs
I	10770478	0.0166655	Swept	SNVs
I	10771240	0.00558655	Swept	SNVs
I	10772163	0.0166655	Swept	SNVs
I	10772427	0.0111417	Swept	SNVs
I	10772980	0.00558655	Swept	SNVs
I	10773254	0.00558655	Swept	SNVs
I	10773814	0.0111417	Swept	SNVs
I	10774247	0.00558655	Swept	SNVs
I	10774435	0.00558655	Swept	SNVs
I	10774790	0.00558655	Swept	SNVs
I	10777488	0.0111417	Swept	SNVs
I	10777759	0.00558655	Swept	SNVs
I	10778288	0.0276189	Swept	SNVs
I	10778721	0.00558655	Swept	SNVs
I	10779235	0.00558655	Swept	SNVs
I	10779326	0.00558655	Swept	SNVs
I	10780041	0.00558655	Swept	SNVs
I	10780210	0.00558655	Swept	SNVs
I	10780267	0.00558655	Swept	SNVs
I	10780456	0.0166655	Swept	SNVs
I	10781058	0.0111417	Swept	SNVs
I	10781539	0.0111417	Swept	SNVs
I	10781942	0.00558655	Swept	SNVs
I	1078366	0.0221579	Swept	SNVs
I	10783810	0.00558655	Swept	SNVs
I	10784059	0.00558655	Swept	SNVs
I	10784145	0.0221579	Swept	SNVs
I	10784262	0.00558655	Swept	SNVs
I	1078440	0.00558655	Swept	SNVs
I	10784404	0.00558655	Swept	SNVs
I	10784820	0.0438136	Swept	SNVs
I	10786357	0.00558655	Swept	SNVs
I	10786390	0.0221579	Swept	SNVs
I	10786592	0.00558655	Swept	SNVs
I	10787160	0.00558655	Swept	SNVs
I	10787227	0.0276189	Swept	SNVs
I	10787322	0.00558655	Swept	SNVs
I	10787637	0.00558655	Swept	SNVs
I	10787749	0.00558655	Swept	SNVs
I	10788079	0.00558655	Swept	SNVs
I	10788200	0.0111417	Swept	SNVs
I	10788219	0.00558655	Swept	SNVs
I	10788802	0.00558655	Swept	SNVs
I	10788884	0.0111417	Swept	SNVs
I	10790168	0.0111417	Swept	SNVs
I	10790590	0.00558655	Swept	SNVs
I	1079071	0.0438136	Swept	SNVs
I	10790721	0.00558655	Swept	SNVs
I	10790893	0.00558655	Swept	SNVs
I	10790911	0.00558655	Swept	SNVs
I	10791248	0.0276189	Swept	SNVs
I	10791251	0.0166655	Swept	SNVs
I	10791284	0.0111417	Swept	SNVs
I	10791602	0.0166655	Swept	SNVs
I	1079193	0.00558655	Swept	SNVs
I	10792721	0.00558655	Swept	SNVs
I	10792988	0.00558655	Swept	SNVs
I	10794064	0.0330485	Swept	SNVs
I	1079416	0.0276189	Swept	SNVs
I	10794960	0.00558655	Swept	SNVs
I	10795461	0.0221579	Swept	SNVs
I	107955	0.0221579	Swept	SNVs
I	10795610	0.00558655	Swept	SNVs
I	10795770	0.00558655	Swept	SNVs
I	10795983	0.0544532	Swept	SNVs
I	10796154	0.0221579	Swept	SNVs
I	10797314	0.0111417	Swept	SNVs
I	10797530	0.00558655	Swept	SNVs
I	10798285	0.00558655	Swept	SNVs
I	10799543	0.00558655	Swept	SNVs
I	10800507	0.0384468	Swept	SNVs
I	10800839	0.0111417	Swept	SNVs
I	10801322	0.00558655	Swept	SNVs
I	10801378	0.0111417	Swept	SNVs
I	10801476	0.00558655	Swept	SNVs
I	10801721	0.0111417	Swept	SNVs
I	10801958	0.0276189	Swept	SNVs
I	10802028	0.0221579	Swept	SNVs
I	10803427	0.00558655	Swept	SNVs
I	10804499	0.00558655	Swept	SNVs
I	10804605	0.0221579	Swept	SNVs
I	10805128	0.0166655	Swept	SNVs
I	10805417	0.00558655	Swept	SNVs
I	10805485	0.00558655	Swept	SNVs
I	10806183	0.0166655	Swept	SNVs
I	10806248	0.00558655	Swept	SNVs
I	10807243	0.00558655	Swept	SNVs
I	10807273	0.00558655	Swept	SNVs
I	10807443	0.00558655	Swept	SNVs
I	10807474	0.00558655	Swept	SNVs
I	10807481	0.00558655	Swept	SNVs
I	10808092	0.0111417	Swept	SNVs
I	10808399	0.00558655	Swept	SNVs
I	10808460	0.00558655	Swept	SNVs
I	10808878	0.0491491	Swept	SNVs
I	10810112	0.0111417	Swept	SNVs
I	10810397	0.00558655	Swept	SNVs
I	10810702	0.00558655	Swept	SNVs
I	10811113	0.00558655	Swept	SNVs
I	10811226	0.00558655	Swept	SNVs
I	10811258	0.00558655	Swept	SNVs
I	10811772	0.00558655	Swept	SNVs
I	10811936	0.0166655	Swept	SNVs
I	10812360	0.00558655	Swept	SNVs
I	10812477	0.0166655	Swept	SNVs
I	10812530	0.00558655	Swept	SNVs
I	10812779	0.0221579	Swept	SNVs
I	10812896	0.0166655	Swept	SNVs
I	10812897	0.00558655	Swept	SNVs
I	10813405	0.0111417	Swept	SNVs
I	10813846	0.00558655	Swept	SNVs
I	10813863	0.0111417	Swept	SNVs
I	10814066	0.00558655	Swept	SNVs
I	10814164	0.0166655	Swept	SNVs
I	10814316	0.00558655	Swept	SNVs
I	10814529	0.0166655	Swept	SNVs
I	10815235	0.00558655	Swept	SNVs
I	10815269	0.0438136	Swept	SNVs
I	10815322	0.00558655	Swept	SNVs
I	10815766	0.0111417	Swept	SNVs
I	10816517	0.0491491	Swept	SNVs
I	10816639	0.00558655	Swept	SNVs
I	10818136	0.00558655	Swept	SNVs
I	10818139	0.0221579	Swept	SNVs
I	10818392	0.00558655	Swept	SNVs
I	10818503	0.0166655	Swept	SNVs
I	10819946	0.0111417	Swept	SNVs
I	10820054	0.00558655	Swept	SNVs
I	10820572	0.00558655	Swept	SNVs
I	10822062	0.0221579	Swept	SNVs
I	10822063	0.00558655	Swept	SNVs
I	10822096	0.0166655	Swept	SNVs
I	10822112	0.00558655	Swept	SNVs
I	10822139	0.00558655	Swept	SNVs
I	10822691	0.00558655	Swept	SNVs
I	10823573	0.00558655	Swept	SNVs
I	10824028	0.0111417	Swept	SNVs
I	10824831	0.00558655	Swept	SNVs
I	10825133	0.0438136	Swept	SNVs
I	10825713	0.00558655	Swept	SNVs
I	10826037	0.00558655	Swept	SNVs
I	10826393	0.00558655	Swept	SNVs
I	10826462	0.0384468	Swept	SNVs
I	10826966	0.00558655	Swept	SNVs
I	10827243	0.0111417	Swept	SNVs
I	10827365	0.0544532	Swept	SNVs
I	10827644	0.00558655	Swept	SNVs
I	10828826	0.00558655	Swept	SNVs
I	10829020	0.0221579	Swept	SNVs
I	10829441	0.00558655	Swept	SNVs
I	10829450	0.0111417	Swept	SNVs
I	10829669	0.0221579	Swept	SNVs
I	10829787	0.0111417	Swept	SNVs
I	10830296	0.00558655	Swept	SNVs
I	10830986	0.00558655	Swept	SNVs
I	10831990	0.0111417	Swept	SNVs
I	10832061	0.0166655	Swept	SNVs
I	10832205	0.00558655	Swept	SNVs
I	10832665	0.00558655	Swept	SNVs
I	10833134	0.00558655	Swept	SNVs
I	10833260	0.0649672	Swept	SNVs
I	10833589	0.00558655	Swept	SNVs
I	10834475	0.0384468	Swept	SNVs
I	10835217	0.00558655	Swept	SNVs
I	10835450	0.00558655	Swept	SNVs
I	10835716	0.0221579	Swept	SNVs
I	10835808	0.00558655	Swept	SNVs
I	10836127	0.0166655	Swept	SNVs
I	10836349	0.0221579	Swept	SNVs
I	10836890	0.00558655	Swept	SNVs
I	10837101	0.0111417	Swept	SNVs
I	10837173	0.00558655	Swept	SNVs
I	10837317	0.00558655	Swept	SNVs
I	10837860	0.00558655	Swept	SNVs
I	10839219	0.0701771	Swept	SNVs
I	10839701	0.0384468	Swept	SNVs
I	10839775	0.0221579	Swept	SNVs
I	10839835	0.0111417	Swept	SNVs
I	10840043	0.00558655	Swept	SNVs
I	10840373	0.0111417	Swept	SNVs
I	10840491	0.0166655	Swept	SNVs
I	10840492	0.00558655	Swept	SNVs
I	10840890	0.00558655	Swept	SNVs
I	10841201	0.00558655	Swept	SNVs
I	10841282	0.00558655	Swept	SNVs
I	10841943	0.00558655	Swept	SNVs
I	10842480	0.00558655	Swept	SNVs
I	10842698	0.00558655	Swept	SNVs
I	10842901	0.00558655	Swept	SNVs
I	10844030	0.00558655	Swept	SNVs
I	10844210	0.0221579	Swept	SNVs
I	10844289	0.00558655	Swept	SNVs
I	10844632	0.00558655	Swept	SNVs
I	10845533	0.0111417	Swept	SNVs
I	10846062	0.0111417	Swept	SNVs
I	10846375	0.00558655	Swept	SNVs
I	10846470	0.00558655	Swept	SNVs
I	10848171	0.0111417	Swept	SNVs
I	10849115	0.0166655	Swept	SNVs
I	10849235	0.00558655	Swept	SNVs
I	10849335	0.0111417	Swept	SNVs
I	10849942	0.00558655	Swept	SNVs
I	10850432	0.00558655	Swept	SNVs
I	10850571	0.0330485	Swept	SNVs
I	10850572	0.0166655	Swept	SNVs
I	10851574	0.0753556	Swept	SNVs
I	10855488	0.0221579	Swept	SNVs
I	108557	0.00558655	Swept	SNVs
I	10855772	0.0111417	Swept	SNVs
I	10856166	0.00558655	Swept	SNVs
I	10856265	0.00558655	Swept	SNVs
I	10856962	0.00558655	Swept	SNVs
I	10857552	0.00558655	Swept	SNVs
I	10857630	0.00558655	Swept	SNVs
I	10857869	0.00558655	Swept	SNVs
I	10858432	0.0438136	Swept	SNVs
I	10860110	0.00558655	Swept	SNVs
I	10860527	0.00558655	Swept	SNVs
I	10860629	0.0166655	Swept	SNVs
I	10860751	0.00558655	Swept	SNVs
I	10861523	0.0111417	Swept	SNVs
I	10861748	0.0111417	Swept	SNVs
I	10861847	0.00558655	Swept	SNVs
I	10862281	0.00558655	Swept	SNVs
I	10863063	0.00558655	Swept	SNVs
I	10863150	0.00558655	Swept	SNVs
I	10863701	0.0166655	Swept	SNVs
I	10863872	0.0330485	Swept	SNVs
I	10864692	0.00558655	Swept	SNVs
I	10865336	0.0221579	Swept	SNVs
I	10865545	0.00558655	Swept	SNVs
I	10866612	0.00558655	Swept	SNVs
I	10866711	0.0111417	Swept	SNVs
I	10866860	0.0166655	Swept	SNVs
I	10866867	0.00558655	Swept	SNVs
I	10867270	0.00558655	Swept	SNVs
I	10867512	0.00558655	Swept	SNVs
I	1086758	0.00558655	Swept	SNVs
I	10867641	0.00558655	Swept	SNVs
I	1086795	0.0276189	Swept	SNVs
I	10868567	0.0166655	Swept	SNVs
I	10870572	0.0221579	Swept	SNVs
I	10871198	0.0166655	Swept	SNVs
I	10871321	0.0276189	Swept	SNVs
I	1087239	0.0805028	Swept	SNVs
I	10873015	0.00558655	Swept	SNVs
I	10873139	0.00558655	Swept	SNVs
I	10873793	0.0221579	Swept	SNVs
I	10874424	0.00558655	Swept	SNVs
I	10875061	0.00558655	Swept	SNVs
I	10875298	0.0330485	Swept	SNVs
I	10876212	0.00558655	Swept	SNVs
I	10876411	0.0221579	Swept	SNVs
I	10876676	0.00558655	Swept	SNVs
I	10877398	0.0701771	Swept	SNVs
I	10877593	0.00558655	Swept	SNVs
I	10877938	0.00558655	Swept	SNVs
I	10878279	0.00558655	Swept	SNVs
I	10878840	0.0111417	Swept	SNVs
I	10879776	0.00558655	Swept	SNVs
I	10879960	0.00558655	Swept	SNVs
I	10880306	0.00558655	Swept	SNVs
I	10880399	0.0111417	Swept	SNVs
I	10880776	0.00558655	Swept	SNVs
I	10882004	0.00558655	Swept	SNVs
I	10882691	0.00558655	Swept	SNVs
I	10883524	0.00558655	Swept	SNVs
I	10884329	0.0166655	Swept	SNVs
I	10884694	0.00558655	Swept	SNVs
I	10884992	0.00558655	Swept	SNVs
I	10885216	0.00558655	Swept	SNVs
I	10885445	0.00558655	Swept	SNVs
I	10885606	0.00558655	Swept	SNVs
I	1088613	0.00558655	Swept	SNVs
I	10886161	0.00558655	Swept	SNVs
I	10886378	0.00558655	Swept	SNVs
I	10886700	0.00558655	Swept	SNVs
I	10887035	0.0111417	Swept	SNVs
I	1088775	0.115654	Swept	SNVs
I	10888141	0.0221579	Swept	SNVs
I	10888376	0.00558655	Swept	SNVs
I	10888490	0.0330485	Swept	SNVs
I	1088874	0.0111417	Swept	SNVs
I	10888774	0.00558655	Swept	SNVs
I	10889177	0.0111417	Swept	SNVs
I	1088994	0.0166655	Swept	SNVs
I	1089004	0.0166655	Swept	SNVs
I	1089080	0.252838	Swept	SNVs
I	10890917	0.00558655	Swept	SNVs
I	10891285	0.00558655	Swept	SNVs
I	10891917	0.00558655	Swept	SNVs
I	10891968	0.0384468	Swept	SNVs
I	10892939	0.0111417	Swept	SNVs
I	10893841	0.00558655	Swept	SNVs
I	10893852	0.00558655	Swept	SNVs
I	10894084	0.00558655	Swept	SNVs
I	1089433	0.00558655	Swept	SNVs
I	10894933	0.00558655	Swept	SNVs
I	10894970	0.00558655	Swept	SNVs
I	10894990	0.00558655	Swept	SNVs
I	10895305	0.00558655	Swept	SNVs
I	10895361	0.00558655	Swept	SNVs
I	10895706	0.0111417	Swept	SNVs
I	10896054	0.00558655	Swept	SNVs
I	1089611	0.00558655	Swept	SNVs
I	10896384	0.00558655	Swept	SNVs
I	10896478	0.00558655	Swept	SNVs
I	10896558	0.0221579	Swept	SNVs
I	10896868	0.0111417	Swept	SNVs
I	10897132	0.0221579	Swept	SNVs
I	10897255	0.0166655	Swept	SNVs
I	10897334	0.0166655	Swept	SNVs
I	10897457	0.0330485	Swept	SNVs
I	10897526	0.00558655	Swept	SNVs
I	10897779	0.00558655	Swept	SNVs
I	10897948	0.0111417	Swept	SNVs
I	10898033	0.0111417	Swept	SNVs
I	10898912	0.00558655	Swept	SNVs
I	10899078	0.00558655	Swept	SNVs
I	10899314	0.0111417	Swept	SNVs
I	10899669	0.00558655	Swept	SNVs
I	10899689	0.00558655	Swept	SNVs
I	10899816	0.00558655	Swept	SNVs
I	10900327	0.00558655	Swept	SNVs
I	10900337	0.00558655	Swept	SNVs
I	10901014	0.00558655	Swept	SNVs
I	10902183	0.00558655	Swept	SNVs
I	10902305	0.0111417	Swept	SNVs
I	1090252	0.318653	Swept	SNVs
I	10902771	0.0111417	Swept	SNVs
I	10903632	0.00558655	Swept	SNVs
I	10903634	0.0111417	Swept	SNVs
I	10904694	0.00558655	Swept	SNVs
I	10905480	0.0221579	Swept	SNVs
I	10905561	0.00558655	Swept	SNVs
I	10905750	0.00558655	Swept	SNVs
I	1090711	0.00558655	Swept	SNVs
I	1090713	0.00558655	Swept	SNVs
I	10907378	0.00558655	Swept	SNVs
I	10907477	0.0221579	Swept	SNVs
I	10907584	0.00558655	Swept	SNVs
I	10907776	0.00558655	Swept	SNVs
I	10908578	0.0111417	Swept	SNVs
I	10909728	0.00558655	Swept	SNVs
I	10911836	0.00558655	Swept	SNVs
I	10911934	0.00558655	Swept	SNVs
I	10912432	0.00558655	Swept	SNVs
I	10912578	0.0330485	Swept	SNVs
I	1091314	0.00558655	Swept	SNVs
I	1091581	0.00558655	Swept	SNVs
I	10917082	0.00558655	Swept	SNVs
I	1091728	0.0330485	Swept	SNVs
I	10917523	0.00558655	Swept	SNVs
I	10917683	0.00558655	Swept	SNVs
I	10918071	0.0856186	Swept	SNVs
I	10918441	0.0221579	Swept	SNVs
I	10918481	0.00558655	Swept	SNVs
I	10918784	0.0221579	Swept	SNVs
I	10920965	0.00558655	Swept	SNVs
I	109219	0.0111417	Swept	SNVs
I	10922523	0.00558655	Swept	SNVs
I	10923816	0.0111417	Swept	SNVs
I	10924328	0.0166655	Swept	SNVs
I	10924405	0.00558655	Swept	SNVs
I	10925162	0.0221579	Swept	SNVs
I	10925254	0.00558655	Swept	SNVs
I	10925741	0.00558655	Swept	SNVs
I	10926421	0.00558655	Swept	SNVs
I	10927092	0.00558655	Swept	SNVs
I	10927417	0.00558655	Swept	SNVs
I	1092759	0.00558655	Swept	SNVs
I	10927655	0.00558655	Swept	SNVs
I	10927677	0.00558655	Swept	SNVs
I	10927899	0.00558655	Swept	SNVs
I	10929481	0.00558655	Swept	SNVs
I	10929640	0.0166655	Swept	SNVs
I	10929643	0.00558655	Swept	SNVs
I	10929880	0.0111417	Swept	SNVs
I	10929881	0.00558655	Swept	SNVs
I	10930393	0.0330485	Swept	SNVs
I	10931645	0.00558655	Swept	SNVs
I	10933174	0.00558655	Swept	SNVs
I	10937058	0.00558655	Swept	SNVs
I	10937242	0.00558655	Swept	SNVs
I	109538	0.00558655	Swept	SNVs
I	109547	0.0111417	Swept	SNVs
I	1096109	0.0384468	Swept	SNVs
I	1096313	0.00558655	Swept	SNVs
I	10964914	0.00558655	Swept	SNVs
I	10965230	0.00558655	Swept	SNVs
I	10965350	0.0330485	Swept	SNVs
I	10969168	0.00558655	Swept	SNVs
I	1097075	0.00558655	Swept	SNVs
I	1097096	0.00558655	Swept	SNVs
I	1097132	0.158589	Swept	SNVs
I	10972164	0.00558655	Swept	SNVs
I	1097233	0.0166655	Swept	SNVs
I	10974413	0.0111417	Swept	SNVs
I	10974683	0.0384468	Swept	SNVs
I	10976269	0.00558655	Swept	SNVs
I	10976389	0.0111417	Swept	SNVs
I	10978044	0.0111417	Swept	SNVs
I	10978247	0.0166655	Swept	SNVs
I	10978720	0.00558655	Swept	SNVs
I	10978771	0.0111417	Swept	SNVs
I	10980706	0.00558655	Swept	SNVs
I	10980769	0.0753556	Swept	SNVs
I	10981164	0.00558655	Swept	SNVs
I	10982525	0.00558655	Swept	SNVs
I	10982918	0.00558655	Swept	SNVs
I	10983561	0.00558655	Swept	SNVs
I	10990824	0.00558655	Swept	SNVs
I	10994178	0.350823	Swept	SNVs
I	10994264	0.00558655	Swept	SNVs
I	10994307	0.00558655	Swept	SNVs
I	10994718	0.0111417	Swept	SNVs
I	1099517	0.0111417	Swept	SNVs
I	10995192	0.00558655	Swept	SNVs
I	10999200	0.00558655	Swept	SNVs
I	11000073	0.00558655	Swept	SNVs
I	11000310	0.0221579	Swept	SNVs
I	11001465	0.00558655	Swept	SNVs
I	11001582	0.00558655	Swept	SNVs
I	1100247	0.00558655	Swept	SNVs
I	11002759	0.00558655	Swept	SNVs
I	11003882	0.0384468	Swept	SNVs
I	11004928	0.00558655	Swept	SNVs
I	11005057	0.00558655	Swept	SNVs
I	11006815	0.00558655	Swept	SNVs
I	11009588	0.00558655	Swept	SNVs
I	11009782	0.00558655	Swept	SNVs
I	11010585	0.00558655	Swept	SNVs
I	11010612	0.00558655	Swept	SNVs
I	11010665	0.0111417	Swept	SNVs
I	11010760	0.00558655	Swept	SNVs
I	11010881	0.00558655	Swept	SNVs
I	11010912	0.00558655	Swept	SNVs
I	11012214	0.0544532	Swept	SNVs
I	11012218	0.00558655	Swept	SNVs
I	11012511	0.0166655	Swept	SNVs
I	11012634	0.00558655	Swept	SNVs
I	11013758	0.0166655	Swept	SNVs
I	11014814	0.00558655	Swept	SNVs
I	11015066	0.00558655	Swept	SNVs
I	11015425	0.0111417	Swept	SNVs
I	11015504	0.0221579	Swept	SNVs
I	11015564	0.0856186	Swept	SNVs
I	11015644	0.0438136	Swept	SNVs
I	11015666	0.353867	Swept	SNVs
I	11016373	0.0166655	Swept	SNVs
I	11016559	0.0330485	Swept	SNVs
I	11017133	0.00558655	Swept	SNVs
I	11017279	0.00558655	Swept	SNVs
I	11017637	0.00558655	Swept	SNVs
I	11018021	0.00558655	Swept	SNVs
I	11018174	0.00558655	Swept	SNVs
I	11018660	0.00558655	Swept	SNVs
I	11018954	0.105768	Swept	SNVs
I	110191	0.0166655	Swept	SNVs
I	11019164	0.00558655	Swept	SNVs
I	11019459	0.0111417	Swept	SNVs
I	11019480	0.00558655	Swept	SNVs
I	11019916	0.00558655	Swept	SNVs
I	11020073	0.0111417	Swept	SNVs
I	11020283	0.0438136	Swept	SNVs
I	11020415	0.0166655	Swept	SNVs
I	11020956	0.00558655	Swept	SNVs
I	11020994	0.00558655	Swept	SNVs
I	11020996	0.00558655	Swept	SNVs
I	11021311	0.00558655	Swept	SNVs
I	11021313	0.0221579	Swept	SNVs
I	11021614	0.0111417	Swept	SNVs
I	11021661	0.00558655	Swept	SNVs
I	11021679	0.0111417	Swept	SNVs
I	11021723	0.0330485	Swept	SNVs
I	11022203	0.0544532	Swept	SNVs
I	11022317	0.0330485	Swept	SNVs
I	11022422	0.00558655	Swept	SNVs
I	11022834	0.00558655	Swept	SNVs
I	11023233	0.0166655	Swept	SNVs
I	11023290	0.0111417	Swept	SNVs
I	11023325	0.00558655	Swept	SNVs
I	11023346	0.00558655	Swept	SNVs
I	11023427	0.00558655	Swept	SNVs
I	11023459	0.00558655	Swept	SNVs
I	11023605	0.00558655	Swept	SNVs
I	11023819	0.00558655	Swept	SNVs
I	11024266	0.0111417	Swept	SNVs
I	11024578	0.0957559	Swept	SNVs
I	11024716	0.0438136	Swept	SNVs
I	11025058	0.00558655	Swept	SNVs
I	11025158	0.0544532	Swept	SNVs
I	11025217	0.00558655	Swept	SNVs
I	11026128	0.0111417	Swept	SNVs
I	11026532	0.00558655	Swept	SNVs
I	11027686	0.353867	Swept	SNVs
I	11027725	0.00558655	Swept	SNVs
I	11027803	0.00558655	Swept	SNVs
I	11028039	0.0111417	Swept	SNVs
I	11028423	0.00558655	Swept	SNVs
I	11028483	0.0221579	Swept	SNVs
I	11028700	0.00558655	Swept	SNVs
I	11029089	0.00558655	Swept	SNVs
I	11029416	0.00558655	Swept	SNVs
I	11029866	0.00558655	Swept	SNVs
I	11029979	0.0330485	Swept	SNVs
I	11030910	0.0544532	Swept	SNVs
I	11031644	0.0111417	Swept	SNVs
I	11031805	0.0111417	Swept	SNVs
I	11032307	0.0111417	Swept	SNVs
I	11033152	0.0438136	Swept	SNVs
I	11035995	0.0111417	Swept	SNVs
I	11036080	0.00558655	Swept	SNVs
I	11036447	0.0166655	Swept	SNVs
I	11037327	0.00558655	Swept	SNVs
I	1103768	0.0805028	Swept	SNVs
I	11038304	0.00558655	Swept	SNVs
I	11040856	0.0111417	Swept	SNVs
I	11048031	0.0438136	Swept	SNVs
I	11048307	0.00558655	Swept	SNVs
I	11049620	0.00558655	Swept	SNVs
I	11050290	0.00558655	Swept	SNVs
I	11051117	0.0111417	Swept	SNVs
I	11052690	0.353867	Swept	SNVs
I	11052701	0.105768	Swept	SNVs
I	1105430	0.00558655	Swept	SNVs
I	1106602	0.0166655	Swept	SNVs
I	1106613	0.0276189	Swept	SNVs
I	1106706	0.00558655	Swept	SNVs
I	11072569	0.0221579	Swept	SNVs
I	11073917	0.00558655	Swept	SNVs
I	11074711	0.00558655	Swept	SNVs
I	11074732	0.00558655	Swept	SNVs
I	11074893	0.0166655	Swept	SNVs
I	11074908	0.00558655	Swept	SNVs
I	11075775	0.0221579	Swept	SNVs
I	11076179	0.0111417	Swept	SNVs
I	110771	0.0111417	Swept	SNVs
I	11077806	0.0330485	Swept	SNVs
I	11078010	0.0753556	Swept	SNVs
I	1107812	0.00558655	Swept	SNVs
I	11078763	0.00558655	Swept	SNVs
I	11078886	0.00558655	Swept	SNVs
I	11079037	0.00558655	Swept	SNVs
I	11079292	0.00558655	Swept	SNVs
I	1108032	0.00558655	Swept	SNVs
I	11081418	0.0166655	Swept	SNVs
I	11082097	0.0111417	Swept	SNVs
I	11083248	0.00558655	Swept	SNVs
I	11084361	0.00558655	Swept	SNVs
I	11085406	0.00558655	Swept	SNVs
I	11086210	0.00558655	Swept	SNVs
I	11086682	0.0805028	Swept	SNVs
I	11086693	0.00558655	Swept	SNVs
I	1108739	0.0649672	Swept	SNVs
I	1108803	0.00558655	Swept	SNVs
I	11089159	0.00558655	Swept	SNVs
I	1108920	0.0276189	Swept	SNVs
I	1108940	0.0166655	Swept	SNVs
I	11089537	0.0111417	Swept	SNVs
I	11090019	0.00558655	Swept	SNVs
I	11090097	0.00558655	Swept	SNVs
I	11090841	0.0111417	Swept	SNVs
I	1109120	0.0384468	Swept	SNVs
I	11091416	0.00558655	Swept	SNVs
I	11091427	0.110727	Swept	SNVs
I	11091696	0.0330485	Swept	SNVs
I	11091787	0.00558655	Swept	SNVs
I	11091834	0.00558655	Swept	SNVs
I	11091915	0.00558655	Swept	SNVs
I	11091919	0.00558655	Swept	SNVs
I	11091981	0.00558655	Swept	SNVs
I	11092176	0.00558655	Swept	SNVs
I	11092330	0.00558655	Swept	SNVs
I	11092367	0.0438136	Swept	SNVs
I	11092392	0.0221579	Swept	SNVs
I	11092414	0.00558655	Swept	SNVs
I	11092879	0.00558655	Swept	SNVs
I	11092938	0.00558655	Swept	SNVs
I	11093674	0.00558655	Swept	SNVs
I	11094170	0.0111417	Swept	SNVs
I	11094186	0.374299	Swept	SNVs
I	11094279	0.0166655	Swept	SNVs
I	11094368	0.00558655	Swept	SNVs
I	11095642	0.0221579	Swept	SNVs
I	11095782	0.0111417	Swept	SNVs
I	11095798	0.00558655	Swept	SNVs
I	11095933	0.00558655	Swept	SNVs
I	11096077	0.0111417	Swept	SNVs
I	1109873	0.00558655	Swept	SNVs
I	11102960	0.00558655	Swept	SNVs
I	11104283	0.00558655	Swept	SNVs
I	11104450	0.00558655	Swept	SNVs
I	11105270	0.0330485	Swept	SNVs
I	11105399	0.00558655	Swept	SNVs
I	1110623	0.163203	Swept	SNVs
I	1110660	0.0544532	Swept	SNVs
I	11106807	0.0221579	Swept	SNVs
I	1110683	0.0276189	Swept	SNVs
I	11107030	0.0330485	Swept	SNVs
I	1110792	0.00558655	Swept	SNVs
I	11108002	0.00558655	Swept	SNVs
I	1110833	0.0166655	Swept	SNVs
I	11108632	0.00558655	Swept	SNVs
I	11108636	0.0438136	Swept	SNVs
I	11109164	0.00558655	Swept	SNVs
I	11109167	0.00558655	Swept	SNVs
[truncated: 193,994 more rows]

## Sheet: README
Supplemental Table S3 Allele frequency and expected heterozygosity of pSTRs in wild C. elegans strains. Expected heterozygosity of SNVs in swept strains.
